# Supplementary material for: Genetic and environmental exposures constrain epigenetic drift over the human life course
Source: HighWire-hosted journal article supplement (doi:10.1101/gr.176933.114), 2014-09-23
Supplement: Supplemental_Material.docx [file Supplemental_Material.docx]

**Figure S1. Heteroscedasticity of beta-value.** (A) Relationship between standard deviation and mean beta value for each probe. (B) Plot of the between- and within-individual variation extracted from the random effects regression by bins of probe mean beta-values.


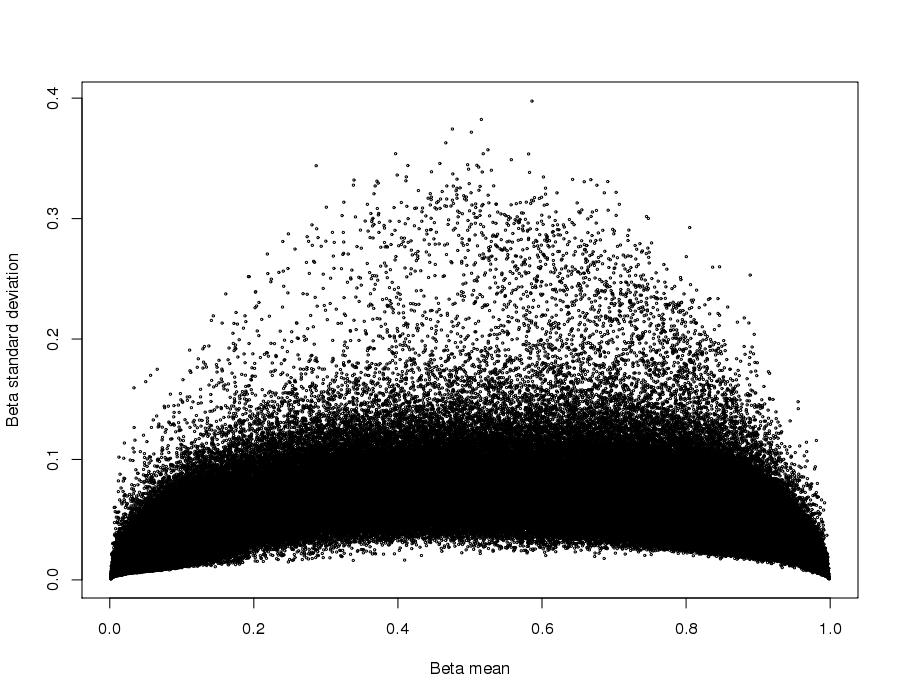


(A)

(B)

**
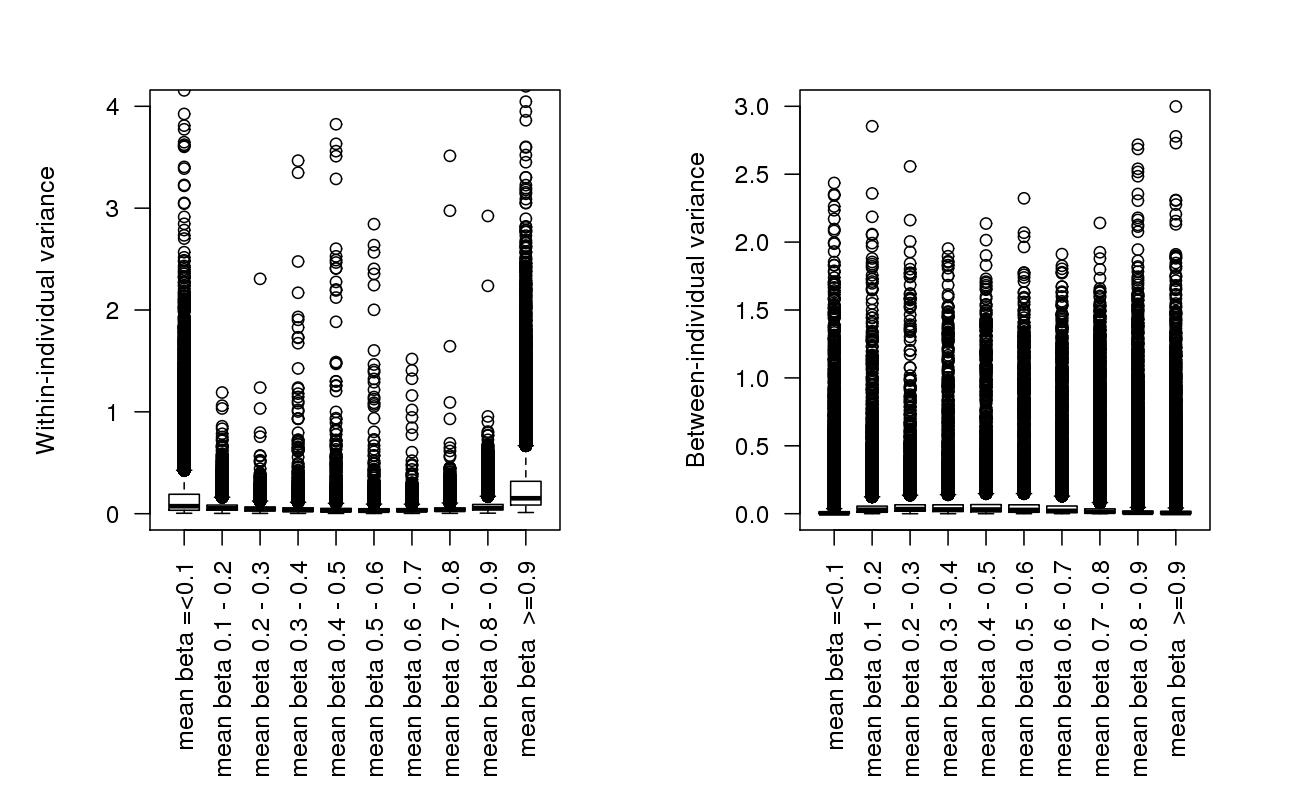
**

**Figure S2. Relationship between Rm and h2 with between- and within-individual variance.** The top two figures show the relationship between Rm (y-axis) with bins of increasing between-individual variance (top left image) and within-individual variance (top right image). The bottom two images show the relationship between h2 (y-axis) with bins of increasing between-individual variance (bottom left) and within-individual variance (bottom right).

**
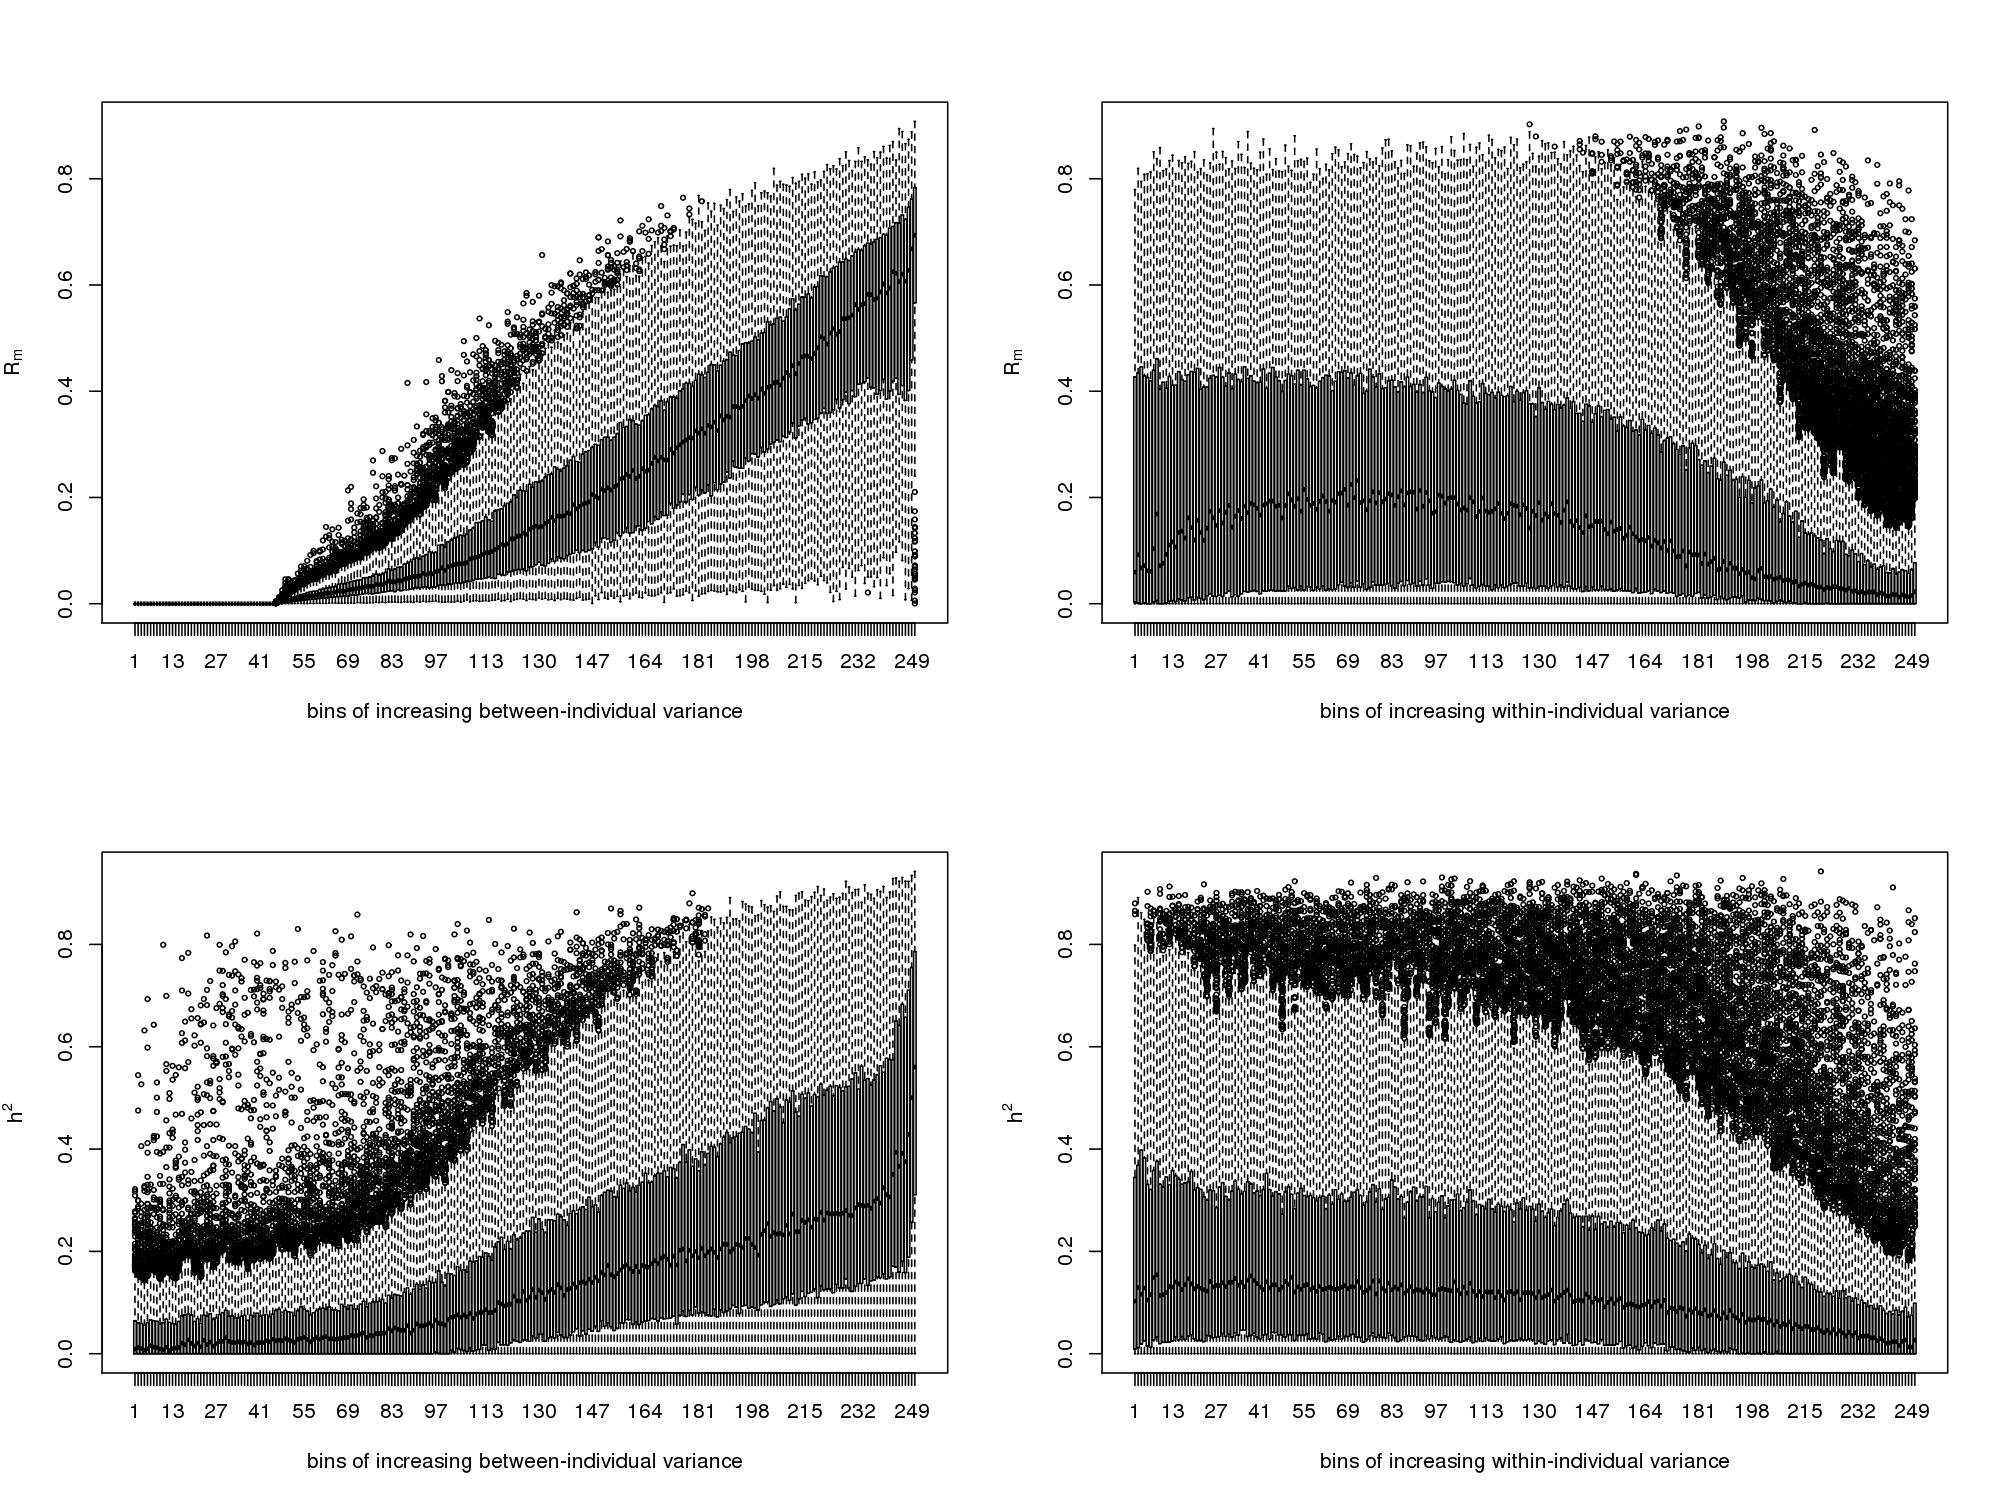
**

**Figure S3. Distribution of *Rm* and h2 by mean beta.** (A)Distribution of Rm by bins of mean beta in LBC data. The first bin is the distribution for probes that were filtered out as all samples had beta-value ≤0.1 or all samples had beta-value ≥0.9 (14,930 probes). (B) Distribution of h2 by bins of mean beta in BSGS data.

**
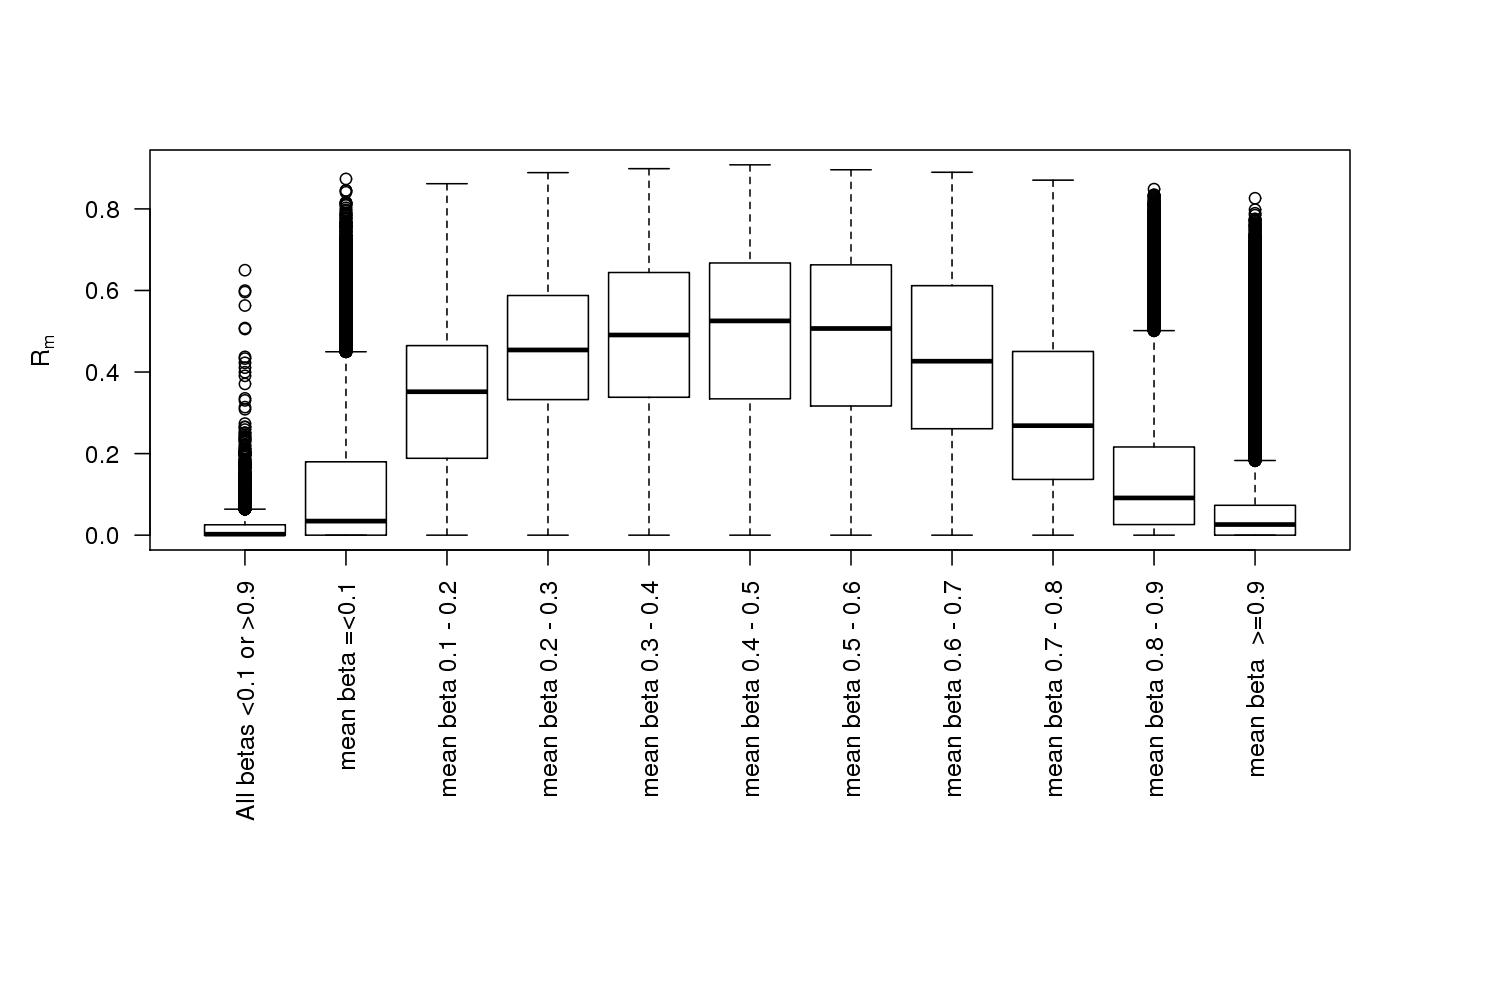
**

(A)

**
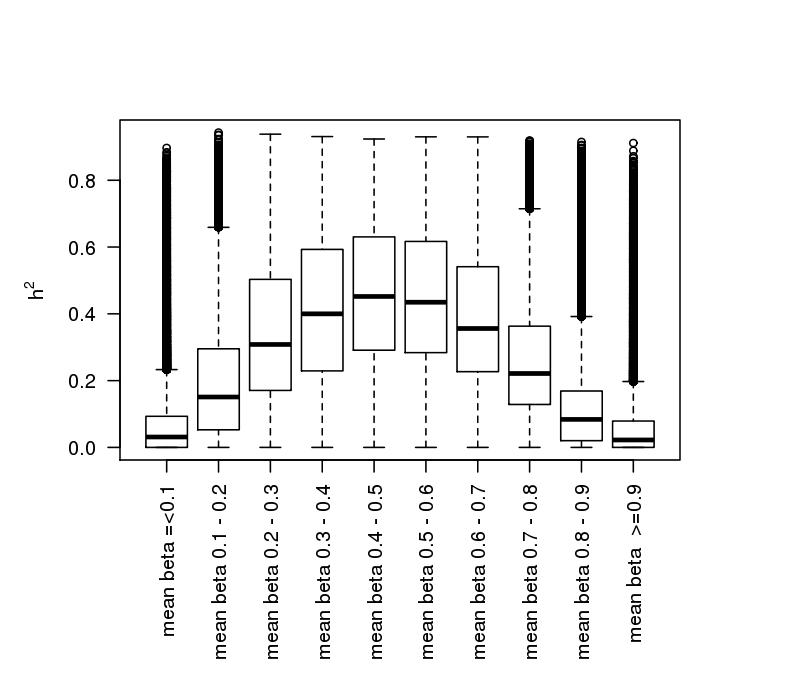
**

(B)

**Figure S4. Distribution of Rm.** Empirical distribution shown in white, null distribution derived from data permutation, shown in blue.

**
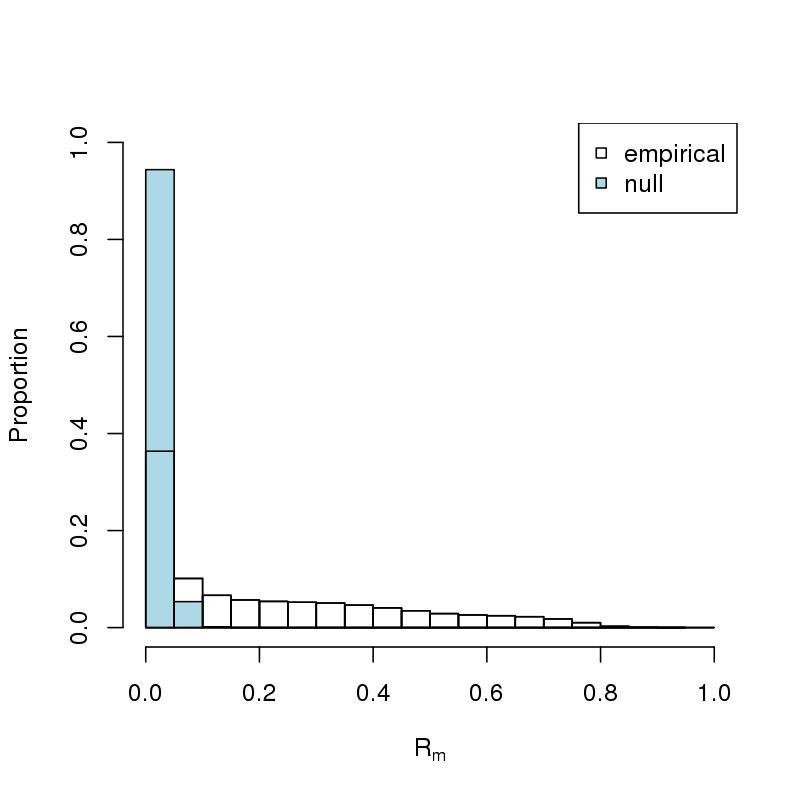
**

**Figure S6 Distribution of Rm in 7 pairs of technical replicates from BSGS data.** Rm was estimated after adjusting for array and position on the array using a generalised linear model with a logistic link function.

**
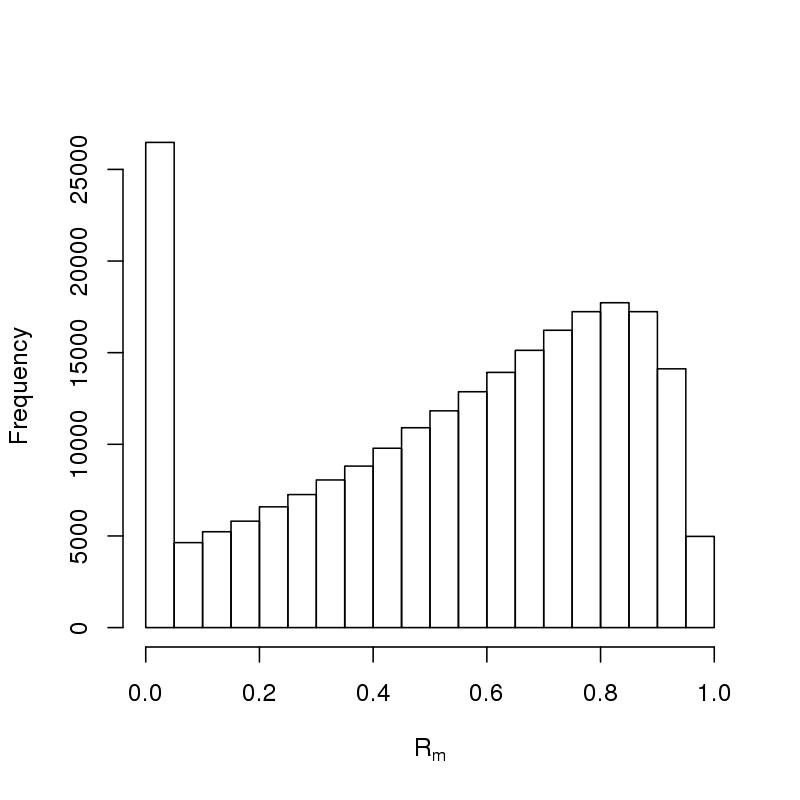
**

**Figure S7. Correlation between Rm and h2 in bins of mean beta-values**

The relationship between Rm and h2 in different bins of mean beta values in the BSGS data is shown below.

**
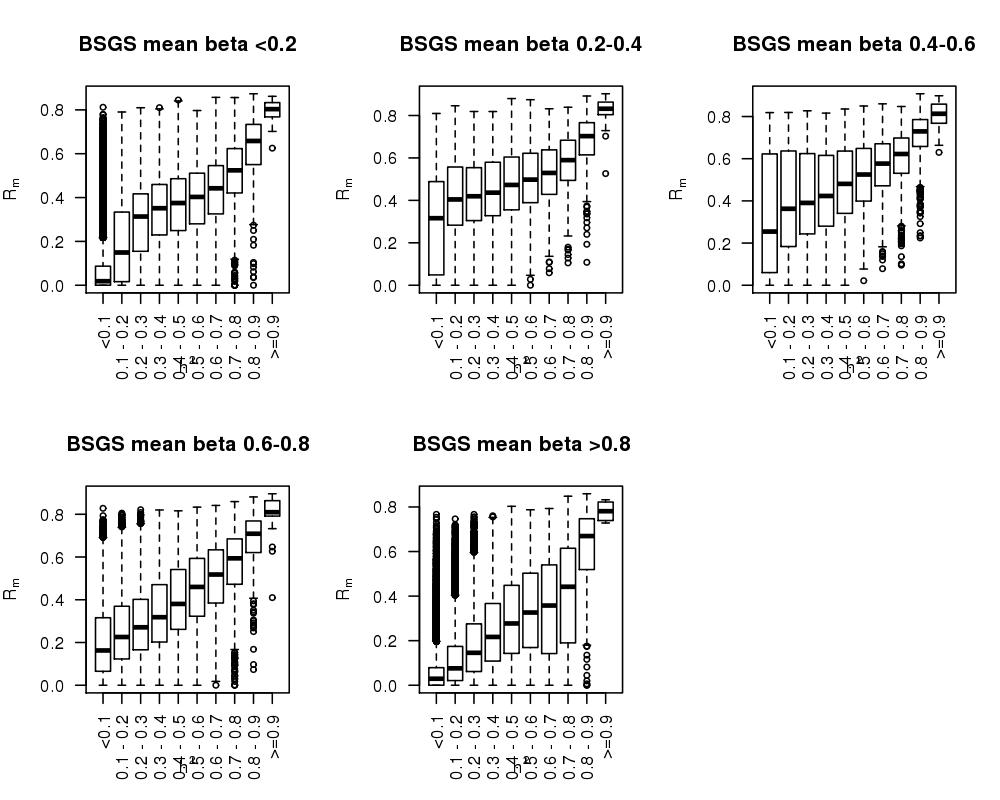
**

**Figure S8. Distribution of Rm and h2 for sex and smoking-associated CpG sites identified in LBC1936.** (A) Correlation between Rm and h2 for 305 CpG sites that were significantly associated with smoking status in LBC1936 was 0.53. (B) Correlation between Rm and h2 for 3810 CpG sites that were significantly associated with smoking status in LBC1936 was 0.68.

**
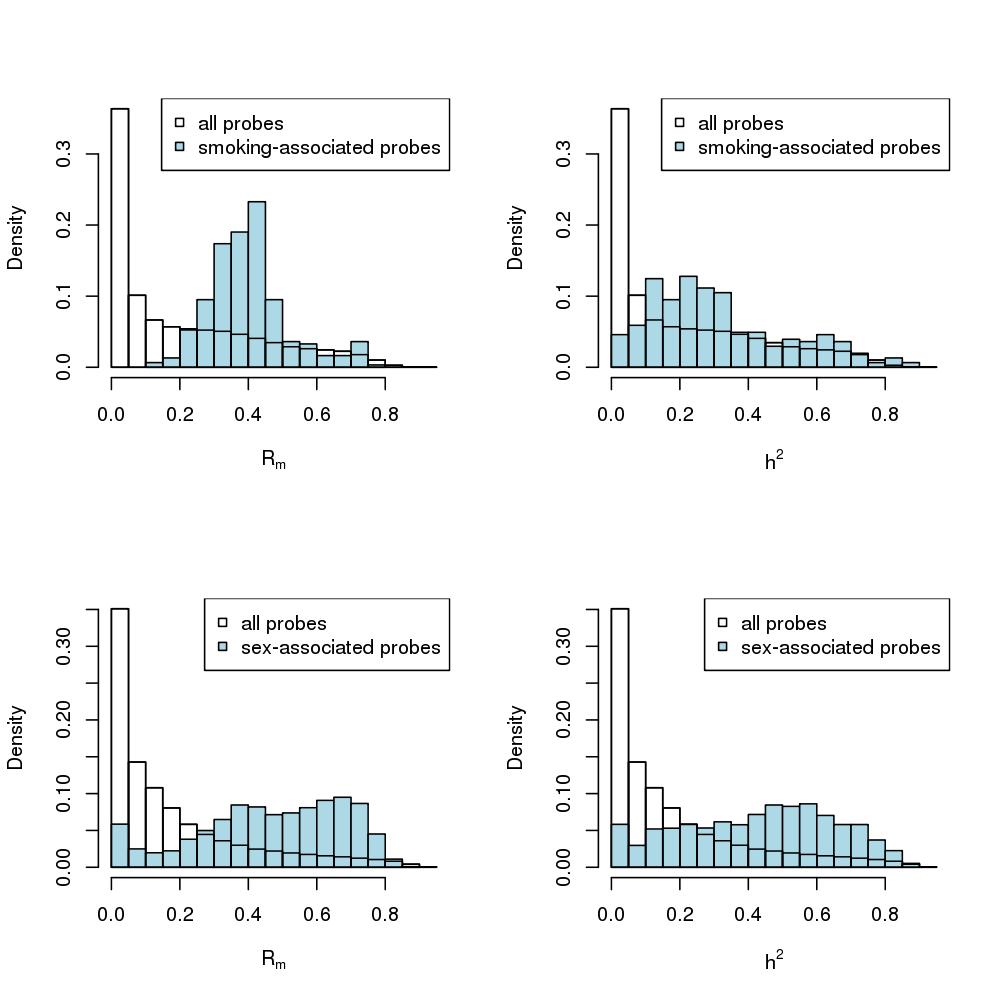
**

(A)

(B)

**Figure S9. Inflation of *Rm* and *h2* due to probe overlap with SNPs and cross-hybridising potential.** Distribution of *Rm* and *h2* is shown for different categories of probes: (A) CpG SNP probes which have a SNP at the target GpG site; (B) non-target CpG which have a SNP elsewhere in the probe; and (C) cross-hybridizing probes that have sequence similarity and therefore likely to hybridize to multiple regions in the genome.

**
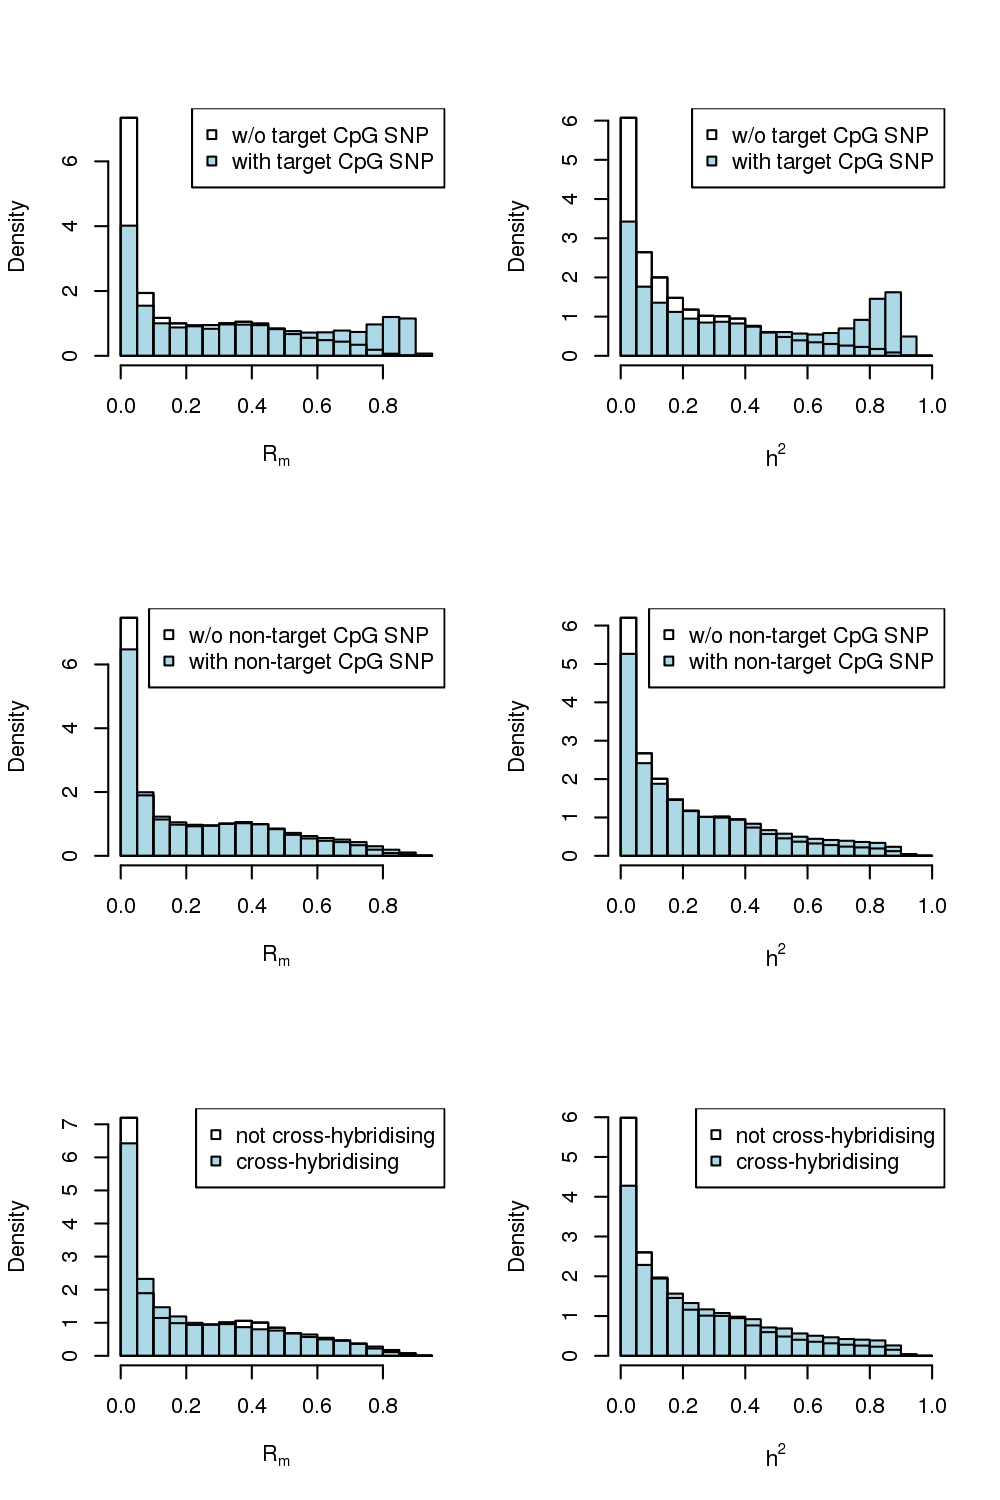
**

**(A)**

**(B)**

**(C)**

**Table S1. SNP associations for top 10 CpG probes with highest *Rm* and *h2.***

| CpG Probe | CpG_chr | CpG_bp | Rm | h2 | SNP | SNP_chr | SNP_bp | Cis/trans mQTL | R2 | Association P-value |
| --- | --- | --- | --- | --- | --- | --- | --- | --- | --- | --- |
| cg01903420 | 13 | 27295928 | 0.87 | 0.94 | rs1374010 | 13 | 27295317 | cis | 0.78 | 9.98E-93 |
| cg07044115 | 10 | 123100181 | 0.87 | 0.93 | rs2420936 | 10 | 123208881 | cis | 0.81 | 3.47E-94 |
| cg21950155 | 13 | 28555387 | 0.88 | 0.93 | rs4614573 | 13 | 28556252 | cis | 0.55 | 4.83E-65 |
| cg26764761 | 16 | 87682142 | 0.89 | 0.93 | rs888647 | 16 | 87682804 | cis | 0.77 | 1.87E-96 |
| cg07792871 | 6 | 29942706 | 0.90 | 0.92 | rs2523946 | 6 | 29941943 | cis | 0.82 | 1.57E-100 |
| cg17052675 | 2 | 3827356 | 0.87 | 0.92 | rs13021385 | 2 | 3826387 | cis | 0.8 | 1.60E-93 |
| cg21548813 | 6 | 291882 | 0.88 | 0.92 | rs11647994 | 16 | 35269324 | trans | 0.30 | 7.34E-35 |
| cg24851651 | 11 | 66362959 | 0.9 | 0.92 | rs498045 | 11 | 66362997 | cis | 0.85 | 1.18E-101 |
| cg21358336 | 17 | 6558440 | 0.88 | 0.92 | rs1443417 | 17 | 6493198 | cis | 0.52 | 3.14E-64 |
| cg09812376 | 17 | 74270190 | 0.87 | 0.92 | rs71815 | 17 | 74270069 | cis | 0.72 | 3.62E-83 |

R2 is the proportion of variance explained in the methylation signal by the associated SNP in BSGS data.
