# Supplementary material for: Genetic and environmental exposures constrain epigenetic drift over the human life course
Source: HighWire-hosted journal article supplement (doi:10.1101/gr.176933.114), 2014-09-23
Supplement: Supplemental_Table_S2.xlsx [file Supplemental_Table_S2.xlsx]

## Sheet: Table_S2_Smoking_association.tx
Probe	Chromosome	BP37	Closest gene	Association P-value		Marginal R2		Beta effect size
				LBC1936	LBC1921	LBC1936	LBC1921	LBC1936	LBC1921	Rm	h2
cg05575921	5	373378	AHRR	<1.00E-50	<1.00E-50	0.576482	0.405824	-0.33318	-0.302722	0.73535	0.239175
cg03636183	19	17000585	F2RL3	<1.00E-50	<1.00E-50	0.360165	0.29972	-0.10722	-0.11124	0.662221	0.349241
cg05951221	2	233284402	ALPPL2	<1.00E-50	<1.00E-50	0.313636	0.206429	-0.0996908	-0.101374	0.713954	0.557513
cg01940273	2	233284934	ALPPL2	<1.00E-50	1.85918e-12	0.282611	0.132186	-0.0867482	-0.0732512	0.633964	0.403926
cg06126421	6	30720080	IER3	<1.00E-50	2.30573e-11	0.225621	0.121428	-0.112267	-0.0975688	0.700816	0.528282
cg25648203	5	395444	AHRR	<1.00E-50	8.15808e-08	0.193095	0.0790183	-0.0660892	-0.0492454	0.403116	0.340961
cg14817490	5	392920	AHRR	<1.00E-50	1.25471e-05	0.173903	0.0539722	-0.0736493	-0.0523254	0.529207	0.599523
cg03329539	2	233283329	ALPPL2	<1.00E-50	1.02493e-05	0.152232	0.0550613	-0.0573113	-0.0418004	0.480813	0.512876
cg23079012	2	8343710	LINC00299	<1.00E-50	1.30887e-07	0.146702	0.0723948	-0.227369	-0.204918	0.37447	0.0635246
cg19572487	17	38476024	RARA	<1.00E-50	2.15053e-06	0.135539	0.0630071	-0.0633814	-0.0513252	0.445692	0.283747
cg15342087	6	30720209	IER3	<1.00E-50	5.65051e-10	0.120414	0.102259	-0.0507965	-0.0537201	0.46083	0
cg24859433	6	30720203	IER3	<1.00E-50	3.31138e-10	0.102986	0.104902	-0.0510915	-0.059404	0.444615	0.0156413
cg25189904	1	68299493	GNG12-AS1	3.77476e-15	5.53366e-08	0.0856158	0.0834286	-0.0769786	-0.097481	0.697914	0.573171
cg27241845	2	233250370	ECEL1P2	3.77476e-15	4.56642e-05	0.0828308	0.0472912	-0.0572479	-0.0452892	0.516746	0.531633
cg22132788	7	45002486	MYO1G	5.90639e-14	1.0846e-05	0.0808143	0.0560503	0.130427	0.127245	0.748277	0.852148
cg27537125	1	25349681	RUNX3	2.02283e-13	2.8342e-05	0.0713787	0.0502538	-0.0313648	-0.0330301	0.378635	0.295676
cg01777341	12	51784862	GALNT6	3.38618e-13	1.14802e-05	0.0676262	0.0534955	0.0424963	0.04704	0.290636	0.180233
cg12803068	7	45002919	MYO1G	4.55858e-13	1.56505e-05	0.0753379	0.0545048	0.100227	0.0988274	0.781661	0.852971
cg24908166	5	1268800	TERT	5.80869e-13	7.82182e-06	0.0618077	0.0537496	-0.0690555	-0.0733283	0.191468	0.0944767
cg13937905	12	53612551	RARG	1.34248e-12	7.36023e-05	0.0696684	0.0447567	-0.0938974	-0.0865312	0.5529	0.642857
cg13193840	2	233285289	ALPPL2	1.39155e-12	1.14237e-06	0.063777	0.0651486	-0.050085	-0.0689799	0.373192	0.0488842
cg18146737	1	92946700	GFI1	2.02682e-12	1.24555e-06	0.0705861	0.0674991	-0.22322	-0.22668	0.701318	0.733467
cg15159987	19	17003890	CPAMD8	3.15126e-12	1.28483e-05	0.0645014	0.0522684	-0.0328225	-0.0367888	0.324968	0.283757
cg18316974	1	92947035	GFI1	1.1253e-11	4.22811e-06	0.0658694	0.0614471	-0.168435	-0.178826	0.703825	0.83089
cg01901332	11	75031054	ARRB1	2.8693e-11	6.25424e-06	0.061592	0.0588642	-0.0330803	-0.042875	0.562052	0.606476
cg04872689	2	68592375	PLEK	1.70848e-09	1.00411e-07	0.0476318	0.0730317	0.0497038	0.0704081	0.252514	0.31087
cg15693572	3	22412385	ZNF385D	2.67943e-09	2.25829e-05	0.0509995	0.0527577	0.0708048	0.0973364	0.697165	0.651261
cg10812236	2	68592394	PLEK	1.20525e-08	8.31051e-05	0.0440527	0.0426577	0.0468751	0.0506883	0.364604	0.351282
cg05897963	19	30157918	PLEKHF1	2.74522e-08	5.23552e-05	0.0451873	0.0471705	-0.034983	-0.0406737	0.687583	0.634848
cg26347170	20	32441424	CHMP4B	2.89676e-08	5.46148e-05	0.0434529	0.0466425	-0.0555071	-0.0603594	0.521859	0.280654
cg12547807	1	9473751	SPSB1	3.32074e-08	3.40941e-05	0.042384	0.0485807	-0.023295	-0.0312642	0.429278	0.510501
cg15552238	19	14785749	EMR3	4.13645e-08	6.82698e-05	0.0398828	0.045311	0.0478769	0.06147	0.333402	0.154341
cg09904140	16	84328208	WFDC1	4.91797e-08	0.000105569	0.0388461	0.039479	0.0303612	0.0334765	0.175619	0.328744
cg11529819	1	27695677	FCN3	5.50156e-08	0.000136498	0.0399169	0.0416677	0.0234164	0.0291062	0.367252	0.200803
cg20295214	1	206226794	AVPR1B	5.991e-08	0.000129332	0.0399819	0.0414861	-0.0344382	-0.043024	0.314832	0.158076
cg04674060	17	7792063	CHD3	1.21151e-07	9.80947e-06	0.0396768	0.0550299	-0.0274428	-0.0362677	0.468164	0.0815603
cg09726654	2	158114268	GALNT5	1.99288e-07	1.02462e-06	0.0369009	0.0658905	0.0270653	0.0429603	0.405172	0.559715
