# Supplementary material for: Genetic and environmental exposures constrain epigenetic drift over the human life course
Source: HighWire-hosted journal article supplement (doi:10.1101/gr.176933.114), 2014-09-23
Supplement: Supplemental_Table_S3.xlsx [file Supplemental_Table_S3.xlsx]

## Sheet: sex_results_1687probes.txt
Probe	Chromosome	BP37		Association p-value		Proportion of methylation variance explained by sex		Effect size
			Closest Gene	P-value LBC1936	P-value LBC1921	LBC1936	LBC1921	LBC1936	LBC1921	Rm	h2
cg06962442	16	68271698	ESRP2	<1.0E-50	<1.0E-50	0.178564	0.163712	0.542621	0.457191	0	0.0614919
cg12691488	1	243053673	LOC731275	<1.0E-50	<1.0E-50	0.173277	0.176867	0.573057	0.548292	0.420259	0.132821
cg12052203	11	66115045	B3GNT1	<1.0E-50	<1.0E-50	0.150811	0.183748	0.158607	0.201363	0.469903	0.699219
cg11388673	8	144371779	ZNF696	<1.0E-50	<1.0E-50	0.137249	0.15164	0.166764	0.190722	0.787653	0.592593
cg08906898	20	34319899	RBM39	<1.0E-50	<1.0E-50	0.128408	0.143824	0.167246	0.251317	0.0456702	0.050308
cg03618918	1	160865097	ITLN1	<1.0E-50	<1.0E-50	0.111655	0.110628	0.452102	0.448581	0	0.129196
cg12204423	4	129732568	PHF17	<1.0E-50	<1.0E-50	0.106367	0.114035	0.37483	0.37941	0.00294265	0.0192308
cg09971754	16	89557657	ANKRD11	<1.0E-50	<1.0E-50	0.0964037	0.110463	0.245363	0.290943	0.279251	0.0828221
cg04946709	16	59789030	LOC644649	<1.0E-50	<1.0E-50	0.0902473	0.100166	0.422466	0.522555	0.0737897	0.150153
cg11841231	2	205543309	PARD3B	<1.0E-50	<1.0E-50	0.0899609	0.0715184	0.243105	0.136465	0.0979382	0.279756
cg03894796	8	144361315	GLI4	<1.0E-50	<1.0E-50	0.0820587	0.110655	0.166648	0.206895	0.794892	0.558621
cg09513416	6	71319075	C6orf57	<1.0E-50	<1.0E-50	0.0806747	0.0605933	0.167656	0.0989415	0.0148518	0.263804
cg12451679	19	47617189	ZC3H4	<1.0E-50	<1.0E-50	0.0700968	0.0612463	0.150376	0.102004	0.171864	0.115063
cg15817705	1	209406063	MIR205HG	<1.0E-50	<1.0E-50	0.0608047	0.0722527	0.136095	0.211621	0.222487	0
cg10334916	2	241508098	RNPEPL1	<1.0E-50	<1.0E-50	0.0595197	0.0566319	0.259816	0.236476	0.0499387	0.100712
cg26095395	4	582447	PDE6B	<1.0E-50	<1.0E-50	0.0557948	0.0569184	0.142313	0.146325	0.663162	0.263052
cg12198769	2	98262341	COX5B	<1.0E-50	<1.0E-50	0.054869	0.06478	0.146814	0.176627	0	0.0850202
cg24004478	7	855632	SUN1	<1.0E-50	<1.0E-50	0.0519622	0.0454437	0.165089	0.127688	0.0677069	0.0482546
cg27641532	6	27648317	LOC100507173	<1.0E-50	6.43929e-15	0.0445716	0.0758228	0.0550926	0.136193	0.548228	0.487831
cg19929617	6	80656586	ELOVL4	<1.0E-50	<1.0E-50	0.0393507	0.0445253	0.14954	0.1691	0.0262931	0
cg02470045	19	56146928	ZNF580	<1.0E-50	<1.0E-50	0.0367496	0.0551576	0.0780862	0.129376	0.766353	0.321608
cg02963556	12	132588637	EP400NL	<1.0E-50	<1.0E-50	0.0330515	0.0356012	0.0868695	0.12177	0.00384877	0.0304878
cg23718606	6	27219812	PRSS16	<1.0E-50	<1.0E-50	0.0324679	0.0368068	0.10121	0.136583	0.35006	0.457481
cg06930757	19	51216389	SHANK1	<1.0E-50	<1.0E-50	0.0293079	0.0349352	0.0991668	0.128584	0.381268	0.612795
cg22863798	9	130889913	PTGES2	<1.0E-50	<1.0E-50	0.0241568	0.0289564	0.0922357	0.13773	0.0170564	0.218238
cg17819896	19	4688966	DPP9	<1.0E-50	<1.0E-50	0.0224084	0.0208155	0.111911	0.0965988	0	0
cg24016624	19	45504513	RELB	<1.0E-50	<1.0E-50	0.0223997	0.0226989	0.0815298	0.108307	0.00655044	0.0416244
cg06583696	2	26101536	ASXL2	<1.0E-50	<1.0E-50	0.0211151	0.0235044	0.0896979	0.1148	0	0
cg07953307	16	29000920	LAT	<1.0E-50	<1.0E-50	0.0177322	0.0177624	0.080593	0.109662	0.0597042	0.0997942
cg00834319	14	64970752	ZBTB1	<1.0E-50	<1.0E-50	-0.014426	-0.0167346	0.0651752	0.101977	0	0
cg14169158	1	166135957	FAM78B	<1.0E-50	<1.0E-50	-0.0200757	-0.0241391	0.0630794	0.106649	0.0497852	0.0382679
cg18804080	3	25705791	TOP2B	<1.0E-50	<1.0E-50	-0.0202291	-0.0291838	0.0560519	0.125129	0.0133184	0.106231
cg17966709	11	57435952	ZDHHC5	<1.0E-50	<1.0E-50	-0.0206775	-0.0207876	0.0837933	0.095647	0	0.082578
cg23612557	16	3014320	KREMEN2	<1.0E-50	<1.0E-50	-0.0219006	-0.0262787	0.0657783	0.109148	0.0531163	0.0614125
cg26841507	12	56583252	SMARCC2	<1.0E-50	<1.0E-50	-0.0222034	-0.0310743	0.069953	0.129059	0.0231075	0.0294118
cg25327233	10	99894913	R3HCC1L	<1.0E-50	<1.0E-50	-0.0238677	-0.0267154	0.0801784	0.0942063	0.0679072	0.130344
cg15373950	12	99039295	APAF1	<1.0E-50	<1.0E-50	-0.0239427	-0.0272083	0.113351	0.1407	0.017146	0.053787
cg22676763	19	8273917	CERS4	<1.0E-50	<1.0E-50	-0.0249161	-0.0273741	0.088681	0.122141	0.00256717	0
cg23261715	12	54144380	CALCOCO1	<1.0E-50	<1.0E-50	-0.0251464	-0.0330328	0.10463	0.123027	0.609455	0.608696
cg01225317	1	205473878	CDK18	<1.0E-50	<1.0E-50	-0.0256774	-0.0241173	0.140922	0.17998	0	0
cg14022202	11	95656984	MTMR2	<1.0E-50	<1.0E-50	-0.025754	-0.0296993	0.0801174	0.109782	0	0
cg13916990	9	34048851	UBAP2	<1.0E-50	<1.0E-50	-0.0262376	-0.0323799	0.137628	0.240963	0.275573	0.353597
cg17450930	7	150065170	REPIN1	<1.0E-50	<1.0E-50	-0.0264287	-0.0328495	0.0594402	0.0928205	0	0.0756048
cg11050859	8	60031823	TOX	<1.0E-50	<1.0E-50	-0.0267165	-0.0277571	0.21991	0.218057	0.308281	0.24467
cg23890282	6	33756082	LEMD2	<1.0E-50	<1.0E-50	-0.0268129	-0.0292756	0.0907376	0.111872	0	0
cg13306335	1	2345376	PEX10	<1.0E-50	<1.0E-50	-0.0268175	-0.0344393	0.0966384	0.128251	0.350726	0.402582
cg17340548	19	46185070	GIPR	<1.0E-50	<1.0E-50	-0.026821	-0.037835	0.0582573	0.111439	0.0353868	0
cg12282830	22	29784441	AP1B1	<1.0E-50	<1.0E-50	-0.0269126	-0.0293937	0.129939	0.161878	0.353844	0.636637
cg21269758	1	25870003	LDLRAP1	<1.0E-50	<1.0E-50	-0.0273971	-0.0316112	0.0908042	0.126917	0.0172859	0.107256
cg24076633	10	79686444	DLG5	<1.0E-50	<1.0E-50	-0.0277546	-0.0280693	0.0932051	0.120228	0.0213897	0.105809
cg19318450	21	34852305	TMEM50B	<1.0E-50	<1.0E-50	-0.0279222	-0.030242	0.134865	0.198904	0.0687278	0.364837
cg20490126	1	25870007	LDLRAP1	<1.0E-50	<1.0E-50	-0.0286161	-0.0286423	0.112271	0.111135	0	0.055668
cg20664247	1	2345475	PEX10	<1.0E-50	<1.0E-50	-0.0288184	-0.0403439	0.0784577	0.129347	0.508908	0.505643
cg26660457	16	1664468	CRAMP1L	<1.0E-50	<1.0E-50	-0.0295697	-0.034835	0.121669	0.191423	0.0455691	0.0568769
cg07817810	3	47205858	KIF9-AS1	<1.0E-50	<1.0E-50	-0.0296629	-0.0291581	0.0971294	0.0974122	0.00617702	0.0926485
cg20385686	1	27024451	ARID1A	<1.0E-50	<1.0E-50	-0.0299014	-0.0241384	0.187513	0.150682	0	0
cg20823695	1	2345410	PEX10	<1.0E-50	<1.0E-50	-0.0301166	-0.0393996	0.141266	0.160656	0.555428	0.509709
cg07008193	11	46318527	CREB3L1	<1.0E-50	<1.0E-50	-0.0301708	-0.0319486	0.116022	0.122991	0.556986	0.551669
cg01293379	18	8610135	RAB12	<1.0E-50	<1.0E-50	-0.0307629	-0.0362138	0.13209	0.166025	0.00650356	0
cg11460509	21	15445421	LIPI	<1.0E-50	<1.0E-50	-0.0308385	-0.0315605	0.200378	0.101808	0.100283	0.422764
cg23444264	10	72219751	NODAL	<1.0E-50	2.22045e-16	-0.0308494	-0.0456362	0.0620908	0.116819	0.611931	0.728125
cg17487553	22	50609135	PANX2	<1.0E-50	<1.0E-50	-0.0309923	-0.0319488	0.125416	0.13961	0.137565	0.211382
cg12000131	17	27941776	ANKRD13B	<1.0E-50	<1.0E-50	-0.0314861	-0.0392332	0.105245	0.134997	0.593389	0.598753
cg01884321	4	15683497	FAM200B	<1.0E-50	<1.0E-50	-0.0322853	-0.0335204	0.110184	0.135859	0.0292884	0
cg17077610	10	22766143	LOC100499489	<1.0E-50	<1.0E-50	-0.032307	-0.0408657	0.131754	0.179016	0.541999	0.458122
cg01882150	11	63933998	MACROD1	<1.0E-50	<1.0E-50	-0.0330722	-0.0363454	0.244597	0.289795	0.0043149	0
cg03316881	10	49515028	FRMPD2	<1.0E-50	<1.0E-50	-0.0331053	-0.0398045	0.0936333	0.139803	0.192686	0.508526
cg00167941	11	70116446	PPFIA1	<1.0E-50	<1.0E-50	-0.0334706	-0.0302899	0.197161	0.124884	0.0709544	0.101317
cg03531326	19	39443344	FBXO17	<1.0E-50	<1.0E-50	-0.0336768	-0.0429852	0.131585	0.172073	0.545814	0.740302
cg25918716	1	45672438	ZSWIM5	<1.0E-50	<1.0E-50	-0.0343643	-0.0374021	0.282351	0.284102	0.181271	0.104733
cg14514226	1	205197651	TMCC2	<1.0E-50	<1.0E-50	-0.0347485	-0.0418666	0.105339	0.129935	0.0576647	0.0121827
cg17055821	17	30669476	C17orf75	<1.0E-50	<1.0E-50	-0.0352438	-0.0437081	0.0630048	0.104192	0.275953	0.241895
cg19661328	18	44497371	PIAS2	<1.0E-50	<1.0E-50	-0.0353367	-0.0392877	0.113446	0.155767	0	0.203236
cg03130180	6	30312857	TRIM39-RPP21	<1.0E-50	<1.0E-50	-0.0365611	-0.0351648	0.129816	0.113978	0.027916	0.236842
cg11620896	11	65627023	MUS81	<1.0E-50	<1.0E-50	-0.0368393	-0.040014	0.123966	0.139303	0.0681363	0
cg26207408	2	203500527	FAM117B	<1.0E-50	<1.0E-50	-0.0371217	-0.0424186	0.106925	0.150312	0	0
cg06752594	1	109825964	PSRC1	<1.0E-50	<1.0E-50	-0.0373924	-0.0466669	0.195576	0.286154	0.0265554	0
cg04637454	6	41651066	TFEB	<1.0E-50	<1.0E-50	-0.0378491	-0.0460029	0.118751	0.148526	0.57049	0.598802
cg15141371	3	39195098	CSRNP1	<1.0E-50	<1.0E-50	-0.0380214	-0.0436315	0.0896137	0.123948	0.0317768	0
cg13360404	7	129710309	KLHDC10	<1.0E-50	<1.0E-50	-0.0384658	-0.0332901	0.126925	0.122201	0	0.0100806
cg18914514	18	18822123	GREB1L	<1.0E-50	<1.0E-50	-0.0387955	-0.0434445	0.142744	0.155084	0.0630747	0.0342052
cg03614513	1	115632038	TSPAN2	<1.0E-50	<1.0E-50	-0.0393734	-0.0370204	0.256416	0.208302	0.0671286	0.00306748
cg23869307	17	42297441	UBTF	<1.0E-50	<1.0E-50	-0.0397535	-0.0444278	0.163097	0.177515	0.0504247	0.109768
cg05518842	16	1823291	EME2	<1.0E-50	<1.0E-50	-0.0399823	-0.0426354	0.159677	0.181197	0.21614	0.289929
cg04055615	6	31697723	DDAH2	<1.0E-50	<1.0E-50	-0.0403948	-0.0416193	0.11431	0.126799	0.0284437	0.0719424
cg20841377	4	151937227	LRBA	<1.0E-50	<1.0E-50	-0.0416391	-0.039903	0.120244	0.124316	0	0
cg23324888	5	111093475	NREP	<1.0E-50	<1.0E-50	-0.0418174	-0.0437274	0.156403	0.177923	0	0.127273
cg09899665	13	76123907	UCHL3	<1.0E-50	<1.0E-50	-0.0418706	-0.0404389	0.140365	0.128251	0.157274	0.395373
cg23814743	3	49466685	NICN1	<1.0E-50	<1.0E-50	-0.0420453	-0.044922	0.210156	0.252947	0.245841	0.734602
cg11331556	5	32312356	MTMR12	<1.0E-50	<1.0E-50	-0.0431298	-0.0540786	0.146973	0.229661	0.0157248	0.174619
cg13711528	19	39138322	ACTN4	<1.0E-50	<1.0E-50	-0.043564	-0.0425441	0.110587	0.115184	0.0372814	0
cg03253995	17	7477617	EIF4A1	<1.0E-50	<1.0E-50	-0.0438214	-0.0533415	0.165622	0.182299	0.127309	0.216362
cg05928806	7	127991614	PRRT4	<1.0E-50	<1.0E-50	-0.0440455	-0.0486822	0.168936	0.155086	0.379176	0.348387
cg24613050	10	81743128	SFTPD	<1.0E-50	<1.0E-50	-0.0442827	-0.0580212	0.128237	0.179848	0.682219	0.415094
cg15823502	6	41650768	TFEB	<1.0E-50	<1.0E-50	-0.0442907	-0.0506352	0.117978	0.144701	0.457799	0.488571
cg26172013	20	32031452	SNTA1	<1.0E-50	<1.0E-50	-0.0444372	-0.0485762	0.143479	0.19332	0.0489486	0
cg04603391	19	31844056	TSHZ3	<1.0E-50	<1.0E-50	-0.0448515	-0.0405615	0.168237	0.148414	0.199444	0.233161
cg00002028	1	20960010	PINK1	<1.0E-50	<1.0E-50	-0.0449902	-0.0543647	0.11757	0.164862	0.0769359	0
cg06281680	2	232347922	NCL	<1.0E-50	<1.0E-50	-0.0450053	-0.056156	0.0893197	0.1265	0.526029	0.507292
cg12247968	13	72441711	DACH1	<1.0E-50	<1.0E-50	-0.0450809	-0.0419166	0.266118	0.210174	0.0882345	0.119145
cg26146390	1	160068471	IGSF8	<1.0E-50	<1.0E-50	-0.0451218	-0.0379751	0.14032	0.111042	0.0618164	0.00605449
cg12767281	10	7452950	SFMBT2	<1.0E-50	<1.0E-50	-0.0453335	-0.0398569	0.107682	0.104845	0.0337404	0
cg12740757	2	30144623	ALK	<1.0E-50	<1.0E-50	-0.0453899	-0.0429236	0.134911	0.146607	0.164391	0.117457
cg20629587	15	31689706	KLF13	<1.0E-50	<1.0E-50	-0.0458311	-0.0439921	0.117045	0.124536	0.285308	0.248521
cg11065518	2	207630263	FASTKD2	<1.0E-50	<1.0E-50	-0.046319	-0.0539268	0.164048	0.256995	0	0
cg14520511	7	91875046	KRIT1	<1.0E-50	<1.0E-50	-0.047342	-0.0470965	0.118283	0.126797	0	0.0468909
cg16503057	3	49711251	APEH	<1.0E-50	<1.0E-50	-0.0479252	-0.0460658	0.0904119	0.114868	0.0423314	0.180262
cg20742366	22	29468997	KREMEN1	<1.0E-50	<1.0E-50	-0.0483804	-0.0423604	0.22115	0.225018	0	0.0762195
cg01815150	3	185304139	SENP2	<1.0E-50	<1.0E-50	-0.049633	-0.0458432	0.247343	0.239398	0.143176	0.217259
cg07433923	6	147827800	SAMD5	<1.0E-50	<1.0E-50	-0.0496506	-0.0495454	0.126292	0.113025	0.0701542	0
cg24158363	17	73401717	GRB2	<1.0E-50	<1.0E-50	-0.0498535	-0.0487759	0.292308	0.301937	0.0852625	0.0814889
cg14300568	18	57567149	PMAIP1	<1.0E-50	<1.0E-50	-0.0499306	-0.0545746	0.139694	0.163489	0	0
cg03124514	5	42943857	LOC648987	<1.0E-50	2.22045e-16	-0.0501576	-0.0641876	0.0575259	0.114041	0.280047	0.546046
cg09634707	10	72219713	NODAL	<1.0E-50	2.22045e-16	-0.0503899	-0.0776603	0.0626352	0.136754	0.658534	0.767417
cg22953960	10	22766081	LOC100499489	<1.0E-50	<1.0E-50	-0.0504278	-0.0533067	0.114987	0.129103	0.529693	0.627174
cg23928726	1	2344998	PEX10	<1.0E-50	<1.0E-50	-0.0505697	-0.0592926	0.215779	0.224678	0.664774	0.67756
cg00049595	6	41650636	TFEB	<1.0E-50	<1.0E-50	-0.0505933	-0.0637557	0.110065	0.152629	0.686324	0.809231
cg24439334	1	2345374	PEX10	<1.0E-50	<1.0E-50	-0.0508513	-0.0695978	0.118037	0.169765	0.659279	0.594156
cg06165179	7	39990544	CDK13	<1.0E-50	<1.0E-50	-0.0508704	-0.0517338	0.159731	0.161968	0.153068	0.244221
cg25454270	11	116661678	APOA5	<1.0E-50	<1.0E-50	-0.0513475	-0.0560352	0.117079	0.130077	0.693765	0.376494
cg12067522	15	52405000	BCL2L10	<1.0E-50	<1.0E-50	-0.052074	-0.0629972	0.115448	0.125662	0.563999	0.194699
cg15344914	12	54567476	SMUG1	<1.0E-50	<1.0E-50	-0.0522321	-0.0491816	0.134523	0.134893	0	0.137113
cg23626733	1	2345398	PEX10	<1.0E-50	<1.0E-50	-0.0527994	-0.0603926	0.170419	0.150262	0.690881	0.517165
cg01276128	19	39138334	ACTN4	<1.0E-50	<1.0E-50	-0.0530223	-0.061643	0.187834	0.257856	0.0152453	0.0194076
cg01065780	22	36019471	MB	<1.0E-50	<1.0E-50	-0.0530844	-0.0544024	0.214086	0.285426	0.0528097	0.127182
cg03405128	4	77341841	CCDC158	<1.0E-50	<1.0E-50	-0.0533209	-0.0640348	0.116029	0.140642	0.628291	0.53102
cg17722571	12	58176348	TSFM;METTL21B	<1.0E-50	<1.0E-50	-0.0534753	-0.0583061	0.102264	0.125462	0	0.0202224
cg19551420	11	33891639	LMO2	<1.0E-50	<1.0E-50	-0.0537329	-0.0682233	0.122628	0.201076	0	0.232179
cg11395414	19	39443284	FBXO17	<1.0E-50	<1.0E-50	-0.0540533	-0.0782046	0.0704704	0.128176	0.383871	0.648318
cg14373988	1	2345333	PEX10	<1.0E-50	<1.0E-50	-0.0541101	-0.0681084	0.076189	0.110274	0.457387	0.294529
cg23629166	1	2345368	PEX10	<1.0E-50	<1.0E-50	-0.0556349	-0.0751424	0.130092	0.181813	0.701313	0.588496
cg22610676	1	156393461	C1orf61	<1.0E-50	<1.0E-50	-0.0559408	-0.069306	0.109932	0.132889	0.791062	0.627317
cg19098932	1	2345152	PEX10	<1.0E-50	<1.0E-50	-0.0561018	-0.076607	0.120473	0.19572	0.331732	0.271812
cg11837402	20	17949715	MGME1	<1.0E-50	<1.0E-50	-0.0567762	-0.0590952	0.1053	0.116179	0.0444554	0.00611621
cg13607218	2	71118823	VAX2	<1.0E-50	<1.0E-50	-0.057012	-0.0606468	0.127551	0.124621	0.601334	0.654088
cg12780322	4	57334163	SRP72	<1.0E-50	<1.0E-50	-0.0581574	-0.0566922	0.291418	0.298182	0.321134	0.0213415
cg01906879	3	81811016	GBE1	<1.0E-50	<1.0E-50	-0.0590683	-0.0676415	0.310698	0.412055	0.0792549	0.00513875
cg08035323	2	9843525	YWHAQ	<1.0E-50	<1.0E-50	-0.0591529	-0.0493142	0.155687	0.125942	0.662352	0.655844
cg24418853	10	17659399	PTPLA	<1.0E-50	<1.0E-50	-0.0592445	-0.0656231	0.117067	0.150423	0.193408	0.460843
cg25697152	12	3067777	TEAD4	<1.0E-50	<1.0E-50	-0.0594295	-0.0528699	0.149022	0.12667	0.389843	0.0336842
cg19311244	4	77341912	CCDC158	<1.0E-50	<1.0E-50	-0.059663	-0.0680829	0.134215	0.125808	0.704727	0.44
cg02093808	4	77342011	CCDC158	<1.0E-50	<1.0E-50	-0.0600185	-0.0673607	0.138994	0.137913	0.710432	0.493927
cg18121224	5	176559563	NSD1	<1.0E-50	<1.0E-50	-0.0604816	-0.0765836	0.111463	0.13377	0.560376	0.64011
cg11704490	2	162284894	TBR1	<1.0E-50	<1.0E-50	-0.0609438	-0.0853752	0.0835308	0.136354	0.550103	0.689899
cg01225095	12	32909323	YARS2	<1.0E-50	<1.0E-50	-0.0611715	-0.0645788	0.276193	0.314398	0	0.0831643
cg06225979	18	32957337	ZNF396	<1.0E-50	<1.0E-50	-0.0615371	-0.0624982	0.212466	0.264271	0	0.078252
cg17470347	1	93646398	CCDC18	<1.0E-50	<1.0E-50	-0.0615767	-0.0719777	0.0792495	0.1095	0.0148379	0.00300903
cg15104066	12	90102578	LOC338758	<1.0E-50	<1.0E-50	-0.064642	-0.0636364	0.147859	0.157543	0	0.0486322
cg10739556	7	27192056	HOXA-AS3	<1.0E-50	<1.0E-50	-0.0647741	-0.0524024	0.133411	0.110042	0.313128	0.0158371
cg15126967	1	27692725	MAP3K6	<1.0E-50	<1.0E-50	-0.0647833	-0.0795387	0.0666031	0.0964224	0	0.0744467
cg16318112	1	969254	AGRN	<1.0E-50	<1.0E-50	-0.0665965	-0.0718468	0.244332	0.301965	0.112758	0.225971
cg13323902	5	140090859	VTRNA1-1	<1.0E-50	<1.0E-50	-0.0666117	-0.0726309	0.308172	0.383451	0.254023	0.521255
cg22999268	13	20532672	ZMYM2	<1.0E-50	<1.0E-50	-0.0669622	-0.0591381	0.176746	0.154803	0.00750244	0.0873096
cg10574074	10	92922714	PCGF5	<1.0E-50	<1.0E-50	-0.0671667	-0.0677962	0.124647	0.134417	0.0264149	0
cg19937979	14	70039915	CCDC177	<1.0E-50	<1.0E-50	-0.0677676	-0.0668475	0.180013	0.140217	0.676148	0.471125
cg06644124	1	200379083	ZNF281	<1.0E-50	<1.0E-50	-0.068447	-0.068723	0.430561	0.459306	0.140171	0.036961
cg06119452	6	169621662	THBS2	<1.0E-50	<1.0E-50	-0.0693431	-0.0817734	0.115816	0.151505	0.58289	0.805066
cg03081205	11	32851371	PRRG4	<1.0E-50	<1.0E-50	-0.073254	-0.0665771	0.207942	0.177761	0.000899776	0
cg26213873	1	112939056	CTTNBP2NL	<1.0E-50	<1.0E-50	-0.0737268	-0.0810101	0.40895	0.476363	0.0519438	0
cg19544707	14	103746266	EIF5	<1.0E-50	<1.0E-50	-0.0751142	-0.0958398	0.135928	0.187734	0.646435	0.685484
cg17493885	5	176559558	NSD1	<1.0E-50	<1.0E-50	-0.0752361	-0.0912722	0.125523	0.133254	0.571353	0.670715
cg03608000	19	11998623	ZNF69	<1.0E-50	<1.0E-50	-0.0766772	-0.0775786	0.270192	0.252034	0.320701	0.0775595
cg23978657	1	89664260	GBP4	<1.0E-50	<1.0E-50	-0.0769624	-0.0854367	0.18314	0.235202	0.155156	0.199195
cg12611527	2	157257110	GPD2	<1.0E-50	<1.0E-50	-0.0777979	-0.0791197	0.294555	0.314938	0.151593	0
cg17076667	10	121418050	BAG3	<1.0E-50	<1.0E-50	-0.0787871	-0.081828	0.187276	0.193109	0.519642	0.360084
cg19731612	5	176559334	NSD1	<1.0E-50	<1.0E-50	-0.0799729	-0.0928208	0.140771	0.131502	0.718719	0.698851
cg12900170	5	85913627	COX7C	<1.0E-50	<1.0E-50	-0.0810825	-0.0907852	0.155547	0.200162	0.217892	0.402439
cg09850442	2	25896287	DTNB	<1.0E-50	<1.0E-50	-0.0815168	-0.0771309	0.224853	0.218994	0.0874478	0.0321285
cg16169375	6	43197328	DNPH1	<1.0E-50	<1.0E-50	-0.0818161	-0.0854474	0.379019	0.451107	0	0
cg19800096	3	49711245	APEH	<1.0E-50	<1.0E-50	-0.0832715	-0.0897967	0.108145	0.144125	0.01672	0.27666
cg10546176	5	34929404	DNAJC21	<1.0E-50	<1.0E-50	-0.0843549	-0.0805337	0.268679	0.213249	0.043544	0.137688
cg12900929	12	108154862	PRDM4	<1.0E-50	<1.0E-50	-0.0852508	-0.0919934	0.383219	0.434383	0.0290013	0.165803
cg16844333	10	89167457	LINC00864	<1.0E-50	<1.0E-50	-0.0853007	-0.08256	0.170256	0.13922	0.7044	0.586313
cg25438440	3	98241168	CLDND1	<1.0E-50	<1.0E-50	-0.0860745	-0.0850289	0.326287	0.319681	0.0209603	0
cg07586008	19	49636535	PPFIA3	<1.0E-50	<1.0E-50	-0.0862284	-0.0955544	0.16901	0.19268	0.697914	0.534813
cg17292758	19	49636594	PPFIA3	<1.0E-50	<1.0E-50	-0.088006	-0.0983079	0.162479	0.186407	0.705719	0.602062
cg16355231	1	2344979	PEX10	<1.0E-50	<1.0E-50	-0.0887715	-0.117531	0.187192	0.249047	0.677553	0.557917
cg21784396	7	127991421	PRRT4	<1.0E-50	<1.0E-50	-0.0902032	-0.0918273	0.296119	0.27542	0.456796	0.548235
cg23758485	16	68482202	SMPD3	<1.0E-50	<1.0E-50	-0.0920042	-0.0847608	0.188857	0.204269	0.0307299	0.101358
cg03890691	16	30023615	DOC2A	<1.0E-50	<1.0E-50	-0.0925944	-0.0946231	0.124209	0.129753	0.586973	0.675824
cg16440561	2	220312854	SPEG	<1.0E-50	<1.0E-50	-0.0933139	-0.13358	0.0673679	0.132227	0.713408	0.739087
cg14030268	10	119135296	PDZD8	<1.0E-50	<1.0E-50	-0.0988844	-0.0967532	0.304982	0.312478	0.0149964	0
cg17561891	7	86849173	TMEM243	<1.0E-50	<1.0E-50	-0.100324	-0.0878914	0.464111	0.424091	0.120644	0.131658
cg20432211	4	77342104	CCDC158	<1.0E-50	<1.0E-50	-0.104333	-0.115951	0.140437	0.172335	0.572816	0.442105
cg03687700	2	24271844	FKBP1B	<1.0E-50	<1.0E-50	-0.104521	-0.101864	0.265761	0.239061	0.642894	0.309572
cg25742246	1	214153460	PROX1	<1.0E-50	<1.0E-50	-0.104598	-0.0959973	0.399795	0.369088	0.250383	0.0983957
cg09067967	4	39529342	UGDH	<1.0E-50	<1.0E-50	-0.116455	-0.113041	0.238904	0.269774	0.141151	0.414188
cg11092486	6	5087604	PPP1R3G	<1.0E-50	<1.0E-50	-0.116809	-0.123199	0.238157	0.239561	0.675246	0.672414
cg07004386	14	70040391	CCDC177	<1.0E-50	<1.0E-50	-0.117833	-0.105594	0.206686	0.14705	0.782091	0.427856
cg22794378	14	89029563	ZC3H14	<1.0E-50	<1.0E-50	-0.11972	-0.105184	0.237945	0.237416	0.0336315	0.13219
cg22345911	17	80231263	CSNK1D	<1.0E-50	<1.0E-50	-0.124295	-0.12046	0.472644	0.516472	0.0515746	0.10574
cg05100634	18	45457604	SMAD2	<1.0E-50	<1.0E-50	-0.125473	-0.132436	0.51611	0.542246	0.101182	0.0273279
cg10563109	6	5087749	PPP1R3G	<1.0E-50	<1.0E-50	-0.125828	-0.141274	0.257127	0.282785	0.803816	0.635
cg09044186	11	116661388	APOA5	<1.0E-50	<1.0E-50	-0.126721	-0.15764	0.0960344	0.126178	0.527155	0.554545
cg03199192	15	34491893	KATNBL1	<1.0E-50	<1.0E-50	-0.127937	-0.156729	0.173883	0.249125	0.01782	0.104628
cg23001456	17	2615074	CLUH	<1.0E-50	<1.0E-50	-0.130373	-0.102677	0.423961	0.230105	0.0930992	0.141393
cg00293303	12	1553525	ERC1	<1.0E-50	<1.0E-50	-0.131775	-0.125367	0.223699	0.244869	0	0
cg24920126	6	5087266	PPP1R3G	<1.0E-50	<1.0E-50	-0.139065	-0.174379	0.185629	0.243828	0.727098	0.679487
cg27615582	12	11002411	PRH1-PRR4	<1.0E-50	<1.0E-50	-0.139764	-0.131525	0.283817	0.268729	0.188874	0.568353
cg09725915	2	70369583	C2orf42	<1.0E-50	<1.0E-50	-0.185604	-0.184742	0.47259	0.469382	0.00122282	0
cg01620164	2	164590272	FIGN	<1.0E-50	<1.0E-50	-0.191157	-0.146252	0.0912757	0.141266	0.713159	0.194872
cg23256579	12	11002403	PRH1-PRR4	<1.0E-50	<1.0E-50	-0.195771	-0.178231	0.465091	0.474954	0.37107	0.447368
cg06710937	13	23489940	BASP1P1	<1.0E-50	<1.0E-50	-0.208857	-0.196633	0.328844	0.305935	0.219255	0.154462
cg03691818	12	53085038	KRT77	<1.0E-50	<1.0E-50	-0.21433	-0.201175	0.598342	0.615007	0.109452	0.19938
cg14558529	6	27648341	LOC100507173	2.22045e-16	1.70974e-14	0.0632702	0.100351	0.0522584	0.118409	0.61091	0.291796
cg06329022	17	26926511	SPAG5-AS1	2.22045e-16	<1.0E-50	-0.027575	-0.0268491	0.0654807	0.107034	0.19646	0.118782
cg07921777	16	67062970	CBFB	2.22045e-16	<1.0E-50	-0.0431841	-0.044778	0.0918027	0.10868	0.0801409	0.650678
cg26104551	2	27851776	CCDC121	2.22045e-16	<1.0E-50	-0.0497744	-0.0488431	0.0953873	0.0873015	0.0404962	0.215447
cg09214243	15	29968124	TJP1	2.22045e-16	4.22995e-13	-0.0586866	-0.0979292	0.0515591	0.119265	0.775232	0.667351
cg01540595	1	75590960	LHX8	2.22045e-16	<1.0E-50	-0.0725688	-0.0837853	0.110445	0.121079	0.728051	0.565829
cg19206146	6	28661759	SCAND3	2.22045e-16	<1.0E-50	-0.08403	-0.0947985	0.116489	0.118223	0.541571	0.498483
cg18384926	15	45722598	C15orf48	4.44089e-16	<1.0E-50	-0.0246454	-0.0248613	0.069182	0.0907137	0.0170366	0.0668724
cg08319905	19	49636270	PPFIA3	4.44089e-16	<1.0E-50	-0.0345217	-0.047024	0.0794154	0.112796	0.601311	0.574491
cg22753548	19	55668066	TNNI3	6.66134e-16	<1.0E-50	0.0550765	0.0750431	0.0663773	0.110878	0.689167	0.693694
cg22266749	4	110223959	COL25A1	6.66134e-16	9.39249e-14	0.0470072	0.0647841	0.0482724	0.108741	0.538715	0.765286
cg19185846	2	71123233	VAX2	6.66134e-16	3.39728e-14	-0.02679	-0.0455163	0.0518886	0.119904	0.621094	0.679872
cg08285934	16	25026600	ARHGAP17	6.66134e-16	<1.0E-50	-0.0314641	-0.0320607	0.102677	0.112391	0.457757	0.642502
cg20047230	16	19535092	CCP110	6.66134e-16	<1.0E-50	-0.0470938	-0.045565	0.0989354	0.0922336	0.0203077	0
cg10767425	15	34788847	GOLGA8B	6.66134e-16	<1.0E-50	-0.084469	-0.0917882	0.124449	0.111426	0.721955	0.6
cg07675285	16	27121267	C16orf82	8.88178e-16	<1.0E-50	-0.0201615	-0.0228724	0.0599863	0.0969704	0.0777446	0.171026
cg05402854	6	111408840	SLC16A10	8.88178e-16	<1.0E-50	-0.0214016	-0.0237721	0.0818523	0.0923944	0.0772532	0.374871
cg19510698	15	101421249	ALDH1A3	8.88178e-16	<1.0E-50	-0.0345806	-0.0497347	0.0626487	0.112212	0.567948	0.577495
cg12414681	15	29968195	TJP1	8.88178e-16	3.04201e-14	-0.0475075	-0.0724319	0.0555853	0.111379	0.749324	0.703779
cg02389942	5	41869679	OXCT1	1.11022e-15	1.46549e-13	-0.0537858	-0.0897344	0.049325	0.116957	0.736577	0.531722
cg24574963	7	149120622	ZNF777	1.11022e-15	8.88178e-16	-0.0553321	-0.0733549	0.057991	0.109271	0.575613	0.803612
cg17718401	4	119199352	SNHG8	1.33227e-15	<1.0E-50	-0.0441934	-0.0550484	0.0794728	0.110944	0.605419	0.389978
cg10638827	16	56665855	MT1M	1.55431e-15	<1.0E-50	-0.0392674	-0.0408338	0.106139	0.11721	0.603242	0.684549
cg19955956	7	72299837	SBDSP1	1.55431e-15	<1.0E-50	-0.0912958	-0.0983608	0.0872339	0.109358	0.534744	0.637811
cg14090916	9	140044904	GRIN1	1.77636e-15	<1.0E-50	0.0424881	0.0484722	0.0938204	0.107864	0.582255	0.464975
cg03613132	8	37888764	EIF4EBP1	1.9984e-15	<1.0E-50	-0.0241611	-0.0231019	0.0780372	0.0990824	0.0387691	0
cg16879052	1	160054270	KCNJ9	1.9984e-15	1.9984e-15	-0.0279627	-0.0434574	0.0606339	0.111764	0.73354	0.527218
cg23897302	14	103393970	AMN	2.66454e-15	<1.0E-50	-0.0365048	-0.0455511	0.0960417	0.111003	0.67332	0.664139
cg14207833	19	18945153	UPF1	3.10862e-15	<1.0E-50	0.0417236	0.0424554	0.122372	0.106046	0.617665	0.750273
cg25663304	5	176172918	UNC5A	3.10862e-15	1.33893e-13	0.0290147	0.0471944	0.0496514	0.116348	0.740966	0.677966
cg06122000	6	83775663	UBE3D	3.10862e-15	<1.0E-50	-0.0299437	-0.0351451	0.0895932	0.0919882	0.00365841	0.00934579
cg04757002	2	20424804	SDC1	3.10862e-15	<1.0E-50	-0.0481856	-0.0437009	0.0965938	0.085452	0.0446017	0.0833333
cg12873476	8	142402728	GPR20	3.55271e-15	<1.0E-50	-0.0322909	-0.0430827	0.0898656	0.112234	0.724162	0.563025
cg05132077	22	49448320	LOC100128946	3.77476e-15	<1.0E-50	0.0960111	0.0976277	0.126252	0.12072	0.812137	0.735
cg13839439	12	54144521	CALCOCO1	3.77476e-15	<1.0E-50	-0.038	-0.0411792	0.129238	0.111322	0.6391	0.522422
cg08541880	3	137833983	DZIP1L	3.9968e-15	<1.0E-50	-0.0205396	-0.0267991	0.050421	0.0806637	0.0411263	0
cg22902089	11	46318223	CREB3L1	4.21885e-15	<1.0E-50	-0.0316916	-0.0410137	0.090298	0.106019	0.613074	0.475987
cg09183450	11	62308513	AHNAK	4.44089e-15	<1.0E-50	-0.0532423	-0.0566936	0.111909	0.111733	0.668366	0.689412
cg14079463	6	127796989	SOGA3	4.44089e-15	<1.0E-50	-0.142709	-0.141658	0.12942	0.105678	0.691115	0.609542
cg22171758	12	54146133	CALCOCO1	5.10703e-15	<1.0E-50	-0.03654	-0.052965	0.0804152	0.105175	0.600983	0.767081
cg17439660	18	906020	ADCYAP1	5.10703e-15	<1.0E-50	-0.0496277	-0.0502334	0.0940081	0.100298	0.282155	0
cg03569507	17	46114237	COPZ2	5.77316e-15	1.72018e-12	-0.0205277	-0.0346513	0.0438599	0.107451	0.529748	0.52879
cg15078284	19	36004994	DMKN	5.77316e-15	1.37668e-14	-0.0352693	-0.0557	0.0578757	0.114231	0.720666	0.770127
cg14464791	11	118661599	DDX6	5.9952e-15	5.8324e-08	-0.0382015	-0.0829426	0.0208515	0.0821878	0	0
cg06853823	16	4466639	CORO7	6.21725e-15	1.35109e-09	-0.0184839	-0.0329325	0.0266327	0.0785236	0.0335567	0
cg16547629	1	44884131	RNF220	6.43929e-15	<1.0E-50	-0.0492418	-0.0497689	0.105422	0.0989728	0.186618	0.101836
cg25403152	8	60031829	TOX	6.88338e-15	<1.0E-50	-0.0372089	-0.0329517	0.115958	0.0999925	0.434861	0.665973
cg00184235	8	126442434	TRIB1	7.77156e-15	<1.0E-50	-0.0246806	-0.0337912	0.0548239	0.0835161	0.154714	0.273003
cg00205605	1	2516401	FAM213B	8.43769e-15	<1.0E-50	-0.0260342	-0.0290187	0.104694	0.115959	0.681374	0.722503
cg07337544	2	96013196	KCNIP3	8.65974e-15	<1.0E-50	-0.0313689	-0.0340963	0.0896632	0.0966001	0.406596	0.370882
cg00843236	16	28074980	GSG1L	8.88178e-15	<1.0E-50	-0.0775292	-0.0755805	0.0873819	0.09239	0.144431	0.0282828
cg19132701	17	78965457	CHMP6	1.08802e-14	5.10703e-15	-0.0174169	-0.0240135	0.0368793	0.0767982	0	0
cg17949451	1	145476874	NBPF10	1.17684e-14	<1.0E-50	-0.0213648	-0.0256878	0.050578	0.082866	0	0
cg11559198	2	232348794	NCL	1.24345e-14	<1.0E-50	-0.0593761	-0.0663423	0.119318	0.107167	0.677129	0.631527
cg08187845	17	1420199	INPP5K	1.66533e-14	<1.0E-50	-0.0376826	-0.0316857	0.104115	0.0813613	0.0400834	0.196755
cg11206167	5	42924367	LOC648987	1.66533e-14	<1.0E-50	-0.115418	-0.1314	0.115517	0.105847	0.807267	0.498489
cg26052357	1	91303544	ZNF644	1.73195e-14	<1.0E-50	-0.0716081	-0.0845644	0.103816	0.107686	0.629391	0.360689
cg25106913	6	27648354	LOC100507173	1.82077e-14	6.19504e-14	0.0601113	0.100804	0.0509449	0.104318	0.549543	0.418462
cg25198113	1	5743886	MIR4417	1.82077e-14	<1.0E-50	-0.0276701	-0.0247217	0.160849	0.104645	0.597546	0.716092
cg24858738	6	13711938	RANBP9	1.84297e-14	<1.0E-50	-0.026074	-0.0283931	0.0612137	0.0851285	0	0.115346
cg07718463	19	30303131	CCNE1	1.88738e-14	2.75335e-14	-0.0187847	-0.0237533	0.0390734	0.0777758	0.0657391	0.0372984
cg05156850	2	88355134	KRCC1	1.95399e-14	1.49436e-13	-0.0322789	-0.0506751	0.0384747	0.0806037	0	0
cg18417954	19	55672513	DNAAF3	2.04281e-14	<1.0E-50	0.0554312	0.0679095	0.0721297	0.101907	0.670758	0.541126
cg13546935	2	29033780	SPDYA	2.37588e-14	<1.0E-50	-0.0546108	-0.0441182	0.137318	0.0896852	0.101341	0.132931
cg24167372	5	146888628	DPYSL3	2.42029e-14	1.10356e-13	0.0363362	0.0584133	0.0497347	0.102529	0.669255	0.451382
cg19583819	5	139283051	NRG2	2.42029e-14	4.96714e-13	-0.0349996	-0.0566109	0.0487352	0.109707	0.584382	0.372165
cg07187808	1	160054321	KCNJ9	2.44249e-14	<1.0E-50	-0.0459479	-0.0540708	0.110257	0.105104	0.76158	0.508264
cg13346869	8	37605517	LOC728024	2.68674e-14	<1.0E-50	-0.0471165	-0.0503421	0.0689694	0.0985418	0.484327	0.22379
cg26372087	1	176318398	PAPPA2	2.90878e-14	<1.0E-50	0.0192462	0.0232955	0.0582254	0.0803348	0.110082	0.136778
cg14171514	11	62308492	AHNAK	2.93099e-14	<1.0E-50	-0.0589872	-0.0587254	0.109551	0.103705	0.62749	0.536496
cg20422417	2	25427108	DNMT3A	3.39728e-14	2.22045e-16	-0.0532336	-0.0686504	0.0634889	0.105557	0.560777	0.607991
cg08082389	14	60561405	PCNXL4	3.44169e-14	<1.0E-50	0.0293379	0.0326641	0.066874	0.0843628	0.0925028	0.509476
cg13163521	15	41803428	LTK	3.44169e-14	5.86198e-14	-0.0258468	-0.0390345	0.0502926	0.0977128	0.436828	0.457172
cg11429111	5	134813329	TIFAB	3.64153e-14	<1.0E-50	-0.0456122	-0.0571951	0.066618	0.100173	0.661127	0.738883
cg01066472	1	75591029	LHX8	3.81917e-14	<1.0E-50	-0.119902	-0.100176	0.143161	0.106264	0.743896	0.561297
cg12610079	1	162838809	C1orf110	4.92939e-14	<1.0E-50	0.0313694	0.0262761	0.0971411	0.0904615	0.133094	0.248705
cg24751928	20	55964459	MIR5095	5.10703e-14	<1.0E-50	-0.0611713	-0.0606394	0.107241	0.0849801	0.21133	0.035497
cg00900124	2	69969033	ANXA4	5.81757e-14	<1.0E-50	-0.0304508	-0.0281283	0.0862495	0.0805473	0.0311297	0.124623
cg22713900	15	41803592	LTK	6.15064e-14	<1.0E-50	-0.0430533	-0.052817	0.0842595	0.105832	0.66968	0.572641
cg19940077	1	200842282	GPR25	6.86118e-14	<1.0E-50	-0.0671073	-0.0811002	0.0924389	0.103595	0.598916	0.611691
cg04045009	19	55667663	TNNI3	7.12763e-14	4.15223e-14	0.0557481	0.0778499	0.0558004	0.0950778	0.720039	0.603239
cg06790825	12	77157634	ZDHHC17	7.43849e-14	<1.0E-50	-0.019813	-0.0209548	0.0634629	0.0766698	0	0
cg09639964	17	909300	ABR	7.4829e-14	<1.0E-50	-0.0582014	-0.0550811	0.114214	0.100895	0.536319	0.481403
cg07830652	13	76123904	UCHL3	7.57172e-14	1.3149e-11	-0.0259691	-0.0411362	0.0308247	0.0778533	0.0285005	0.00807265
cg00936626	3	196694856	PIGZ	7.79377e-14	<1.0E-50	-0.0475078	-0.0561753	0.0863214	0.0987652	0.728961	0.717131
cg20700731	1	41951480	EDN2	8.61533e-14	3.85271e-10	-0.0132426	-0.0229456	0.0375686	0.084493	0.420572	0.357052
cg00982521	6	41374806	NCR2	8.79297e-14	1.04714e-10	-0.0419761	-0.0631046	0.0379906	0.094851	0.589939	0.81161
cg08590939	5	41869963	OXCT1	1.108e-13	9.39249e-14	-0.0562642	-0.0831669	0.0510002	0.101892	0.69572	0.451904
cg20136951	1	2345400	PEX10	1.11466e-13	<1.0E-50	-0.0241818	-0.0263218	0.115243	0.100003	0.474268	0.305104
cg22921760	14	22005368	SALL2	1.16129e-13	<1.0E-50	-0.0328005	-0.0374464	0.0708441	0.093778	0.306858	0.6021
cg19214300	16	56709503	MT1IP	1.17018e-13	<1.0E-50	-0.0313124	-0.0398559	0.0734256	0.101305	0.522838	0.583726
cg04720592	1	118165724	FAM46C	1.22791e-13	<1.0E-50	-0.0527226	-0.0417807	0.152369	0.0999234	0.408722	0.603732
cg00030604	1	2379831	PLCH2	1.29008e-13	<1.0E-50	0.0263024	0.0318088	0.0711204	0.100417	0.536201	0.703285
cg23880736	4	582172	PDE6B	1.29674e-13	<1.0E-50	0.0608938	0.0728491	0.0637418	0.0929122	0.614213	0.185484
cg00398420	16	56681867	MT1DP	1.45661e-13	6.95e-14	-0.0357048	-0.0526188	0.0516795	0.0985954	0.715102	0.762948
cg23373640	14	65696480	MIR4708	1.53877e-13	2.91256e-12	-0.0461137	-0.0720265	0.0490946	0.0986936	0.640195	0.80804
cg19881928	17	62039009	SCN4A	1.8141e-13	<1.0E-50	-0.0678457	-0.0677277	0.104957	0.089053	0.277052	0.0707733
cg01550017	5	42924215	LOC648987	1.82521e-13	<1.0E-50	-0.0681963	-0.0728334	0.0936931	0.097792	0.719547	0.506036
cg20031364	17	36731152	SRCIN1	1.85185e-13	<1.0E-50	-0.0393062	-0.0483748	0.076181	0.103568	0.720039	0.653527
cg24790297	19	51226357	CLEC11A	1.88516e-13	<1.0E-50	-0.0417706	-0.0511164	0.085183	0.099497	0.612086	0.592105
cg13348458	6	27569671	LOC100507173	1.9118e-13	<1.0E-50	0.0931301	0.0962112	0.104608	0.108947	0.723419	0.394523
cg04102734	1	209406725	MIR205HG	2.00728e-13	<1.0E-50	0.0898139	0.102656	0.0474659	0.072795	0.0169968	0.206218
cg03652339	10	112258641	DUSP5	2.02283e-13	<1.0E-50	-0.022353	-0.0293835	0.0632606	0.0954676	0.574488	0.59417
cg26533311	6	27206911	PRSS16	2.09166e-13	<1.0E-50	-0.0718287	-0.0803985	0.0936754	0.098035	0.711343	0.413511
cg05330360	17	38023993	ZPBP2	2.24709e-13	<1.0E-50	-0.046386	-0.058925	0.0788751	0.0910709	0.546935	0.331263
cg18137414	22	42313943	SHISA8	2.29816e-13	<1.0E-50	-0.0509624	-0.061709	0.113496	0.0996967	0.602346	0.481026
cg15496335	1	2377971	PLCH2	2.52909e-13	<1.0E-50	0.0405526	0.0447241	0.0900359	0.0927814	0.757364	0.672962
cg18795569	19	3480508	C19orf77	2.56684e-13	<1.0E-50	0.0713472	0.0702402	0.11405	0.102128	0.825392	0.620061
cg04202002	2	127643360	BIN1	2.5957e-13	<1.0E-50	-0.0615643	-0.0552509	0.128595	0.0991463	0.68006	0.527291
cg26576890	6	41374939	NCR2	2.81997e-13	2.78679e-09	-0.0619772	-0.10267	0.0320276	0.0970578	0.696501	0.824524
cg16182055	5	137879011	ETF1	2.92433e-13	<1.0E-50	-0.0360914	-0.0404298	0.0542445	0.0742826	0.00535704	0.0954825
cg15902621	4	159579631	RXFP1	3.35731e-13	<1.0E-50	-0.0383773	-0.0304985	0.104704	0.0777697	0.114285	0.304481
cg13475732	19	55972855	ISOC2	3.5083e-13	<1.0E-50	0.102169	0.121071	0.0712838	0.0955649	0.638951	0.160081
cg19367436	6	75953935	COX7A2	3.53939e-13	1.22125e-14	-0.0628165	-0.0943026	0.0528076	0.093805	0.559779	0.532403
cg04693399	19	4909447	UHRF1	3.57714e-13	4.2566e-13	-0.0512613	-0.0715198	0.03548	0.0677213	0.0303325	0
cg15148078	19	3480561	C19orf77	3.6704e-13	<1.0E-50	0.0626694	0.0619688	0.110935	0.100368	0.786105	0.63174
cg01120874	9	133811816	FIBCD1	4.73621e-13	<1.0E-50	-0.026086	-0.0301261	0.0897207	0.0938366	0.476172	0.632791
cg20390711	6	127796683	SOGA3	4.79838e-13	<1.0E-50	-0.144786	-0.139048	0.131735	0.0903598	0.770591	0.541708
cg24514921	2	64246311	VPS54	4.81171e-13	<1.0E-50	-0.016756	-0.0204978	0.0458683	0.0725189	0	0.0255102
cg26297808	7	1372924	UNCX	5.16032e-13	<1.0E-50	0.0459326	0.0557273	0.0610733	0.0851968	0.453999	0.679325
cg07218647	2	121338498	LOC84931	5.24025e-13	<1.0E-50	-0.0507478	-0.0580789	0.0934752	0.0946177	0.714413	0.749495
cg09639931	17	38024394	ZPBP2	5.7776e-13	<1.0E-50	-0.0682522	-0.0541102	0.149267	0.0865593	0.476407	0.338446
cg19292062	20	524344	CSNK2A1	6.29718e-13	<1.0E-50	-0.0336409	-0.0269861	0.101941	0.0855847	0.28059	0
cg23065174	1	63833578	ALG6	6.55476e-13	8.65974e-15	-0.0131489	-0.0167949	0.0407307	0.0704634	0	0.111224
cg11660018	11	86510915	PRSS23	6.70575e-13	4.88498e-15	-0.0227851	-0.0320347	0.0570349	0.101547	0.580691	0.589431
cg01048203	14	21027321	RNASE9	6.80345e-13	<1.0E-50	0.0554285	0.0450317	0.121861	0.0765883	0	0.0796277
cg04891961	17	27939900	ANKRD13B	7.39631e-13	<1.0E-50	-0.0338303	-0.0455709	0.0717643	0.0937457	0.635606	0.574737
cg06030274	6	150307797	RAET1K	7.776e-13	<1.0E-50	-0.0803831	-0.0849597	0.0913878	0.0919574	0.82232	0.62751
cg05927268	14	74769367	ABCD4	8.20899e-13	<1.0E-50	-0.0356448	-0.0357671	0.0614022	0.0767949	0.109636	0.0942249
cg01945624	4	8230847	SH3TC1	8.32445e-13	1.77636e-15	-0.0239768	-0.0301317	0.0560373	0.0870626	0.531231	0.526756
cg14280964	1	37940281	ZC3H12A	8.45324e-13	8.55205e-11	-0.0289236	-0.0424964	0.0309208	0.0729148	0.0644239	0
cg15175162	4	15657657	FBXL5	8.61089e-13	<1.0E-50	-0.0502875	-0.0594606	0.0845498	0.0912282	0.709274	0.737
cg06070970	8	144359074	GLI4	9.28591e-13	<1.0E-50	0.0558151	0.0637758	0.0942915	0.098369	0.811202	0.573674
cg20816361	1	2467100	HES5	9.37916e-13	<1.0E-50	0.0536002	0.0492596	0.112668	0.0961387	0.606043	0.570354
cg22986084	14	39901328	FBXO33	9.42357e-13	<1.0E-50	-0.0204542	-0.0211013	0.0759318	0.070749	0.0902834	0.112121
cg05301470	6	28558006	SCAND3	1.03562e-12	<1.0E-50	-0.0563826	-0.0698187	0.0663943	0.0952415	0.591017	0.465235
cg25910261	7	157405965	PTPRN2	1.06537e-12	<1.0E-50	0.0829505	0.0877591	0.0977942	0.0963394	0.74803	0.610891
cg03618211	4	103941300	SLC9B1	1.06715e-12	<1.0E-50	-0.0533844	-0.0566507	0.0785187	0.0920436	0.444712	0.524109
cg07052513	2	86668451	KDM3A	1.0778e-12	<1.0E-50	-0.0304624	-0.0233151	0.113417	0.0686415	0.00782696	0.126888
cg00533649	19	42431930	ARHGEF1	1.11089e-12	6.69909e-13	-0.0194392	-0.0322209	0.0503315	0.0907016	0.744031	0.751111
cg11565911	12	72233249	TBC1D15	1.13554e-12	<1.0E-50	-0.0622456	-0.0646844	0.0973755	0.0982985	0.710334	0.425253
cg09066361	7	126890254	GRM8	1.1795e-12	<1.0E-50	-0.0869647	-0.0754074	0.136299	0.10015	0.76164	0.300805
cg03934782	16	77822989	VAT1L	1.19837e-12	<1.0E-50	-0.0264427	-0.0245026	0.108572	0.0753147	0.0882547	0.0113636
cg14367344	1	146644336	PRKAB2	1.28941e-12	<1.0E-50	-0.0150551	-0.016122	0.0591833	0.0798337	0.130524	0.194699
cg02826525	2	39186885	LOC375196	1.30873e-12	<1.0E-50	-0.0727819	-0.0689356	0.103129	0.090924	0.518732	0.444915
cg27151362	16	30023515	DOC2A	1.37934e-12	<1.0E-50	-0.0300425	-0.0294753	0.106331	0.0969372	0.691855	0.696246
cg04502620	16	30020843	DOC2A	1.5592e-12	2.93099e-14	-0.0330489	-0.0457994	0.0537808	0.0958172	0.57098	0.683778
cg16394260	1	93811744	DR1	1.80433e-12	1.47388e-08	-0.0188523	-0.0318744	0.025702	0.0785732	0.219091	0.285858
cg15161667	11	46940613	LRP4	1.82365e-12	2.5517e-10	-0.0189831	-0.0310117	0.0354898	0.0894099	0.344002	0.311258
cg05778996	10	103347983	POLL	1.91158e-12	<1.0E-50	0.0196546	0.0189212	0.0747637	0.0624765	0	0
cg17643699	12	27091484	FGFR1OP2	1.97775e-12	<1.0E-50	-0.021991	-0.0250884	0.0547387	0.0746561	0	0
cg10757027	7	150783788	AGAP3	2.00928e-12	5.9579e-12	-0.016643	-0.0228439	0.0308866	0.0669359	0.00452905	0
cg13026730	3	71804139	GPR27	2.04925e-12	<1.0E-50	-0.0502319	-0.0544731	0.081838	0.0828418	0.565483	0.558442
cg01001533	10	44184868	ZNF32-AS3	2.05591e-12	2.22045e-16	-0.0264667	-0.035741	0.0667674	0.0906318	0.722834	0.763383
cg20995778	19	55478262	NLRP2	2.33302e-12	1.26565e-14	0.0588241	0.074749	0.0568002	0.0976653	0.808706	0.700393
cg12180613	5	132158560	SHROOM1	2.48401e-12	<1.0E-50	-0.0440253	-0.0486245	0.0903651	0.0890371	0.629643	0.410515
cg22970003	7	157406032	PTPRN2	2.49178e-12	<1.0E-50	0.0781527	0.0823707	0.0972633	0.0955312	0.76373	0.524525
cg03160935	9	132242593	LOC100506190	2.51066e-12	3.54115e-11	-0.0206181	-0.0305512	0.0371584	0.0811522	0.353168	0.543478
cg22979368	2	217501581	IGFBP2	2.75513e-12	3.13003e-08	-0.0176907	-0.032165	0.0290342	0.0824584	0.617418	0.672539
cg23370946	4	183061955	MGC45800	2.97629e-12	<1.0E-50	-0.0367378	-0.0419929	0.0889967	0.0885267	0.704721	0.549428
cg06688399	17	18162242	FLII	3.10907e-12	8.18303e-11	-0.0192361	-0.0264891	0.0294363	0.0701971	0.095145	0.158169
cg27278519	12	81104111	MYF6	3.11329e-12	8.65974e-14	-0.053623	-0.0726487	0.0487812	0.0860466	0.509914	0.715596
cg14825413	8	144358566	GLI4	3.19145e-12	<1.0E-50	0.106805	0.12472	0.0780648	0.0926256	0.780813	0.563366
cg17554553	10	31321002	ZNF438	3.37375e-12	<1.0E-50	0.0299817	0.0267195	0.0867452	0.0672479	0.0406145	0.0823171
cg08877188	3	195943579	SLC51A	3.50031e-12	2.22045e-16	-0.0540387	-0.0693514	0.0639928	0.08708	0.568625	0.634755
cg12349832	17	72951240	HID1	3.53007e-12	7.4718e-13	-0.0174002	-0.0252551	0.0472479	0.0884057	0.463177	0.511318
cg24018609	1	34630796	CSMD2	3.63598e-12	2.22045e-16	0.0262652	0.0292066	0.0458438	0.0696849	0.0203888	0.0575314
cg26354191	1	3547523	WRAP73	3.64753e-12	1.32462e-07	-0.0163612	-0.0273414	0.024809	0.0834686	0.385297	0.476035
cg23009419	3	46618597	TDGF1	3.98837e-12	3.11151e-12	-0.0275137	-0.0371948	0.0465736	0.0848526	0.640201	0.762286
cg19280206	3	196694932	PIGZ	4.16023e-12	<1.0E-50	-0.0554206	-0.0598398	0.0875158	0.088826	0.704316	0.723363
cg06844930	4	125633631	ANKRD50	4.2093e-12	5.21583e-13	-0.0237506	-0.0345194	0.0416309	0.0829862	0.295249	0.133544
cg08064553	16	90038854	CENPBD1	4.27325e-12	1.73535e-11	-0.0160718	-0.0205757	0.0293873	0.066863	0	0.0417941
cg03727500	2	232348334	NCL	4.53926e-12	<1.0E-50	-0.0433979	-0.0499688	0.104477	0.0878699	0.702708	0.646943
cg03845837	16	67203406	HSF4	5.21116e-12	7.99805e-13	-0.0246866	-0.0354805	0.0492408	0.0895193	0.634253	0.686007
cg13430552	2	25427652	DNMT3A	5.22293e-12	<1.0E-50	-0.0274996	-0.0329575	0.0676754	0.0875559	0.528086	0.669673
cg05475702	1	812248	FAM41C	5.44675e-12	5.92294e-10	-0.0153723	-0.0241564	0.0333881	0.0819335	0.375014	0.472574
cg00421221	2	121106091	INHBB	5.54001e-12	<1.0E-50	-0.0304248	-0.038128	0.0634914	0.08163	0.452872	0.541139
cg00378510	19	2291020	LINGO3	5.5782e-12	<1.0E-50	0.0540071	0.0609382	0.0649751	0.0824526	0.710985	0.829016
cg00325531	1	75591353	LHX8	5.58131e-12	<1.0E-50	-0.120362	-0.100184	0.133813	0.0883825	0.709166	0.544073
cg02288564	19	49934404	SLC17A7	6.22857e-12	<1.0E-50	-0.0896303	-0.10084	0.0666695	0.0831136	0.480285	0.14053
cg13104274	1	169078316	ATP1B1	6.80034e-12	7.10543e-15	-0.0337093	-0.045333	0.0506479	0.0805487	0.477713	0.578158
cg16828491	4	8230829	SH3TC1	6.99774e-12	<1.0E-50	-0.023626	-0.0260702	0.0863656	0.080565	0.541571	0.575305
cg21126707	12	81111012	MYF5	7.45604e-12	<1.0E-50	-0.0612091	-0.0627894	0.102096	0.087818	0.72422	0.396396
cg08643005	19	1652627	TCF3	7.56351e-12	2.22045e-16	-0.0271977	-0.0303307	0.0507939	0.0706793	0.0767438	0
cg15635472	12	113659329	TPCN1	7.97962e-12	<1.0E-50	-0.0233999	-0.0253704	0.048352	0.0669882	0	0.124874
cg20785560	1	78511235	GIPC2	7.98961e-12	3.8723e-11	-0.0324899	-0.0513407	0.041068	0.0823441	0.494566	0.609589
cg14195377	11	60928647	VPS37C	8.00138e-12	<1.0E-50	-0.0258502	-0.0218342	0.0930615	0.0691473	0.308056	0.561194
cg20408276	2	38300586	CYP1B1	8.0127e-12	<1.0E-50	-0.0587555	-0.0702936	0.0660679	0.0899345	0.687554	0.739
cg14470209	3	128598183	ACAD9	8.76987e-12	5.80314e-12	-0.0128719	-0.0167243	0.0312973	0.0651927	0	0.0575758
cg15364537	1	205538310	MFSD4	8.79208e-12	<1.0E-50	-0.0245375	-0.0237995	0.0706182	0.0746138	0.125913	0.118019
cg03626579	19	58868858	ZNF497	9.98712e-12	6.88249e-12	-0.0287925	-0.0395513	0.0443303	0.0751315	0.458042	0.460385
cg07107628	6	27210934	PRSS16	1.00124e-11	<1.0E-50	-0.066822	-0.0693945	0.0697687	0.085563	0.550085	0.278112
cg10416593	22	50966123	TYMP	1.06577e-11	8.88178e-16	-0.0245248	-0.0289254	0.0576894	0.0865178	0.475334	0.675
cg27475169	11	119190850	MCAM	1.15334e-11	8.43769e-15	-0.0223551	-0.0310493	0.0568999	0.0847099	0.575334	0.701835
cg14575854	17	37896175	GRB7	1.25702e-11	1.58096e-13	-0.0367983	-0.0462445	0.0493282	0.0778768	0.57439	0.617021
cg05868531	2	232348602	NCL	1.28773e-11	<1.0E-50	-0.0524504	-0.0534727	0.112312	0.0839483	0.645515	0.627816
cg12996417	4	152198109	PRSS48	1.29079e-11	3.39728e-14	-0.0136887	-0.0164201	0.0469926	0.0630253	0.213898	0.10911
cg17364487	16	30381677	TBC1D10B	1.30043e-11	<1.0E-50	-0.0188711	-0.0231087	0.046129	0.0698829	0.0254175	0.0813008
cg13142134	6	42695332	ATP6V0CP3	1.32461e-11	<1.0E-50	-0.051232	-0.047525	0.0945122	0.0804191	0.537212	0.504972
cg09766820	1	75593018	LHX8	1.37372e-11	<1.0E-50	-0.0678719	-0.0677675	0.107432	0.0884965	0.781774	0.548842
cg03410961	6	391680	IRF4	1.54732e-11	4.77551e-12	-0.0147858	-0.0209473	0.0325726	0.0628448	0	0.0325203
cg02394686	19	55973099	ISOC2	1.61382e-11	6.77907e-11	0.144372	0.178731	0.0397414	0.0776153	0.557545	0.143725
cg13897914	15	41695294	NDUFAF1	1.65106e-11	5.9952e-15	-0.0576133	-0.0718661	0.0585402	0.0811883	0.642974	0.482382
cg04625615	15	41788368	ITPKA	1.70497e-11	5.77982e-13	-0.0287768	-0.0395411	0.0499603	0.079568	0.598178	0.506187
cg18933331	1	110186418	AMPD2	1.70648e-11	<1.0E-50	-0.0223785	-0.0219651	0.0799837	0.088492	0.438168	0.623717
cg23332732	12	26986274	ITPR2	1.74427e-11	<1.0E-50	-0.0345049	-0.0254459	0.109798	0.0626928	0	0.0132383
cg01825831	3	42814880	CCDC13	1.80336e-11	<1.0E-50	-0.0257302	-0.0268604	0.0482421	0.0690343	0	0
cg23512275	21	45232595	LOC284837	1.92759e-11	<1.0E-50	-0.0229694	-0.0216569	0.0957012	0.0857792	0.522381	0.74427
cg24360241	2	233370823	PRSS56	1.99776e-11	8.54872e-14	-0.0237002	-0.0340037	0.0538966	0.0786693	0.710637	0.507788
cg21488876	19	5250376	PTPRS	2.04277e-11	1.11022e-15	-0.0401304	-0.0438387	0.056249	0.0719111	0.390064	0.59267
cg25294504	20	9491559	LAMP5	2.13696e-11	<1.0E-50	-0.0913759	-0.0845682	0.089901	0.0746977	0.415178	0.441468
cg22584138	17	28562220	SLC6A4	2.15801e-11	<1.0E-50	-0.0607962	-0.063363	0.107326	0.0792701	0.66533	0.369936
cg19401111	3	195943345	SLC51A	2.1932e-11	2.85105e-13	-0.026934	-0.0389987	0.0488858	0.0781252	0.527496	0.518072
cg06768010	2	74729502	LBX2	2.2468e-11	1.33227e-15	-0.0230314	-0.0293747	0.0586118	0.0861556	0.592225	0.661954
cg14686645	17	42452426	ITGA2B	2.27014e-11	<1.0E-50	-0.0512298	-0.0578802	0.0797218	0.0810236	0.654853	0.697778
cg19463256	19	46915351	CCDC8	2.30675e-11	<1.0E-50	-0.0663204	-0.080388	0.0801752	0.0845681	0.735878	0.798427
cg26865747	6	28601377	SCAND3	2.45595e-11	<1.0E-50	-0.128719	-0.119935	0.0981847	0.0842755	0.769073	0.511202
cg21419585	1	118166117	FAM46C	2.50848e-11	<1.0E-50	-0.0549242	-0.0472175	0.0950719	0.0754412	0.278986	0.347188
cg20310608	20	25128805	LOC284798	2.57452e-11	6.66134e-16	-0.0634461	-0.0837407	0.0604259	0.0824196	0.741231	0.51506
cg21201109	19	11307090	KANK2	2.67746e-11	<1.0E-50	-0.0269217	-0.0261901	0.0762812	0.0770428	0.309241	0.357692
cg00521048	13	50159798	RCBTB1	2.77007e-11	<1.0E-50	-0.0239267	-0.0246852	0.0896485	0.0638603	0.236281	0.409457
cg25987564	4	6010075	JAKMIP1	2.78191e-11	2.39808e-14	0.0641178	0.0797949	0.0543589	0.0835205	0.710867	0.382323
cg09973416	16	85644118	GSE1	2.87823e-11	1.34275e-11	-0.0234254	-0.0295922	0.0297622	0.0649378	0	0.214944
cg04087740	3	71804142	GPR27	3.38551e-11	<1.0E-50	-0.0578914	-0.0581137	0.0824313	0.0733706	0.495394	0.607264
cg08955754	2	201981395	CFLAR	3.3886e-11	1.11022e-15	-0.0136318	-0.0155015	0.0431919	0.0619299	0	0.112025
cg22857963	8	144358043	GLI4	3.4474e-11	<1.0E-50	0.0991481	0.109263	0.0918454	0.0875576	0.806893	0.637081
cg22622886	1	9189641	GPR157	3.45348e-11	<1.0E-50	-0.030799	-0.0370619	0.0464358	0.0634173	0	0.0877016
cg02242734	22	18064224	SLC25A18	3.47018e-11	4.95688e-11	-0.0382118	-0.0551455	0.0389	0.0820945	0.608501	0.496461
cg11333007	15	52121944	TMOD3	3.73648e-11	8.88178e-16	-0.0182147	-0.0214266	0.0497227	0.0760511	0.302432	0.25227
cg27329091	2	213698049	MIR4776-2	3.75202e-11	<1.0E-50	-0.0803414	-0.0881586	0.0662496	0.0765612	0.568959	0.436735
cg20118422	15	64455210	PPIB	3.84028e-11	<1.0E-50	-0.0287221	-0.0252649	0.0670118	0.0618783	0.00687036	0
cg05783384	2	218843735	TNS1	3.88394e-11	<1.0E-50	0.0643234	0.0675719	0.0787473	0.0842104	0.792922	0.847992
cg24933709	7	149120687	ZNF777	4.23395e-11	1.51212e-13	-0.0241081	-0.030835	0.0505242	0.0857549	0.484358	0.794737
cg00238353	10	129785537	PTPRE	4.52849e-11	2.81952e-12	-0.0351604	-0.0418839	0.0378097	0.0717598	0.204926	0.581522
cg03594515	3	129346178	TMCC1	4.62352e-11	5.04397e-12	-0.0198614	-0.0262466	0.0357096	0.0729174	0.247934	0.0918367
cg05767720	6	32117281	PRRT1	4.71632e-11	<1.0E-50	-0.0477273	-0.0580621	0.0683457	0.0790303	0.584654	0.714141
cg16276982	15	29968032	TJP1	4.7877e-11	3.50278e-10	-0.053026	-0.0817911	0.0377785	0.0810507	0.729445	0.669643
cg04831505	12	72233240	TBC1D15	4.91718e-11	<1.0E-50	-0.0600627	-0.0681854	0.0739688	0.0843599	0.610658	0.311927
cg03655330	3	50337494	HYAL1	5.13072e-11	1.65119e-11	-0.022865	-0.0334363	0.0404675	0.075467	0.314434	0.389205
cg14205016	11	8290476	LMO1	5.1475e-11	8.58091e-12	-0.0272729	-0.0392599	0.0472641	0.0813133	0.643074	0.617861
cg06618474	14	105952171	CRIP1	5.29243e-11	2.68594e-10	-0.0138351	-0.0200671	0.0353797	0.0794449	0.499409	0.558442
cg06415891	1	2467096	HES5	5.45384e-11	<1.0E-50	0.0626361	0.0509604	0.124738	0.0841442	0.653601	0.729059
cg05348216	6	27222905	PRSS16	5.84806e-11	1.79856e-14	-0.0383787	-0.0522971	0.0482345	0.0764727	0.330318	0.579218
cg05056638	8	24800824	NEFL	6.25315e-11	2.22045e-16	-0.0778847	-0.0981376	0.0683182	0.0776126	0.734179	0.513158
cg21811204	5	132158625	SHROOM1	6.4039e-11	2.22045e-15	-0.0436956	-0.0543004	0.0594095	0.0762918	0.613839	0.394707
cg01605783	21	45232587	LOC284837	6.46234e-11	<1.0E-50	-0.0213799	-0.026189	0.0650168	0.0813433	0.552518	0.580791
cg04189591	22	42309398	SHISA8	6.55325e-11	<1.0E-50	-0.0284955	-0.0371903	0.0752925	0.0801613	0.660041	0.693291
cg13753527	9	37040454	PAX5	6.64455e-11	7.1717e-09	-0.0227801	-0.0363119	0.0301895	0.0775588	0.408143	0.587583
cg01345136	12	132904123	GALNT9	6.65767e-11	5.61484e-12	0.0417879	0.0612322	0.0453588	0.0792837	0.644653	0.721
cg06787675	1	155051759	EFNA3	7.07858e-11	2.88214e-13	-0.0556179	-0.0747063	0.03779	0.0589709	0	0
cg19560927	19	46995312	PNMAL2	7.10496e-11	6.75171e-12	-0.0330116	-0.0493071	0.0470437	0.0808226	0.774604	0.708669
cg02978784	6	28460106	GPX6	7.1172e-11	4.7031e-08	-0.026948	-0.0488002	0.0290405	0.0779564	0.458221	0.402484
cg22763739	20	34190196	SPAG4	7.1549e-11	6.92888e-09	-0.0172242	-0.0274559	0.0302654	0.0667544	0.340918	0.35865
cg05829046	7	2557446	LFNG	7.73297e-11	1.46734e-07	-0.0153274	-0.0244481	0.0234987	0.0706858	0.382336	0
cg25864523	6	28557388	SCAND3	7.90972e-11	8.19968e-09	0.0331495	0.0476295	0.0281385	0.0755174	0.294156	0.531532
cg20749955	8	9009401	PPP1R3B	8.20091e-11	5.38091e-08	-0.0417088	-0.0779262	0.0291195	0.0715938	0.641413	0.540196
cg23457166	6	127797286	SOGA3	8.21061e-11	<1.0E-50	-0.0597622	-0.0533951	0.0832496	0.070415	0.553334	0.491405
cg19904905	19	49469667	FTL	8.4871e-11	4.10273e-09	-0.0252065	-0.0372083	0.0315699	0.0750477	0.469014	0.365302
cg03792788	2	121338607	LOC84931	8.66507e-11	<1.0E-50	-0.0352535	-0.0404961	0.0721633	0.0755454	0.619424	0.752066
cg19603903	19	57742345	AURKC	9.06082e-11	2.35061e-11	-0.0628177	-0.088912	0.0467261	0.0808146	0.770892	0.500491
cg17868445	4	83294709	HNRNPD	9.59841e-11	<1.0E-50	-0.0193346	-0.0178488	0.0566113	0.0605971	0.00396284	0
cg00186462	3	100401284	GPR128	9.68037e-11	<1.0E-50	-0.0977607	-0.111732	0.0844911	0.080033	0.745725	0.464903
cg27597505	12	54148217	CALCOCO1	9.8237e-11	4.44089e-16	-0.0544136	-0.0638718	0.0662657	0.0774655	0.72071	0.782
cg02258201	9	35906148	HRCT1	1.0273e-10	<1.0E-50	-0.0460779	-0.0319947	0.169913	0.07967	0.560146	0.573046
cg08124399	6	74104868	DDX43	1.05311e-10	<1.0E-50	-0.0787613	-0.0946494	0.0645072	0.0783525	0.686472	0.601015
cg20630655	15	75918700	SNUPN	1.05475e-10	2.89805e-10	-0.0202454	-0.0273596	0.034907	0.0779445	0.434642	0.728223
cg00937681	4	77723304	SHROOM3	1.07991e-10	9.53078e-11	-0.0305314	-0.0485547	0.0382093	0.0780295	0.62995	0.714286
cg07469926	5	114514717	TRIM36	1.12989e-10	<1.0E-50	-0.0404585	-0.0448514	0.0614502	0.0802322	0.596039	0.310127
cg16021159	1	57142074	PRKAA2	1.14447e-10	<1.0E-50	0.0283502	0.0237623	0.0777653	0.0566006	0.00803665	0.0181452
cg17330048	5	80257322	RASGRF2	1.20334e-10	<1.0E-50	-0.0491839	-0.0538953	0.0696306	0.0733992	0.689678	0.778706
cg19227924	17	28565709	SLC6A4	1.24533e-10	1.24183e-08	-0.0193633	-0.0331043	0.0300323	0.0678061	0.559489	0.551339
cg10766585	4	24801110	SOD3	1.31235e-10	<1.0E-50	-0.0533988	-0.053243	0.0906035	0.073929	0.688711	0.368635
cg05714155	2	172974735	DLX2	1.33172e-10	6.12843e-14	-0.0574556	-0.0632453	0.0508704	0.0729699	0.516727	0.764706
cg27532360	17	42452994	ITGA2B	1.35761e-10	4.44089e-15	-0.0284739	-0.0357633	0.0572762	0.0742241	0.59566	0.585556
cg25704207	3	50649454	MAPKAPK3	1.384e-10	1.43569e-08	0.0107279	0.0166548	0.0222508	0.0531206	0	0
cg07616871	2	218843504	TNS1	1.41538e-10	<1.0E-50	0.0649112	0.0659873	0.0802906	0.0790512	0.710867	0.858913
cg04519487	15	52404977	BCL2L10	1.43425e-10	1.32561e-13	-0.0343421	-0.0436099	0.0541516	0.0719174	0.695693	0.504712
cg10184864	4	9693329	DRD5	1.52103e-10	<1.0E-50	-0.0502837	-0.0474855	0.0577482	0.0585374	0	0.0242915
cg12862851	18	74203132	ZNF516	1.54956e-10	<1.0E-50	-0.063906	-0.0509314	0.14116	0.0703751	0.251169	0.150713
cg06759085	2	191555076	NAB1	1.58178e-10	<1.0E-50	0.0585631	0.0571408	0.0884209	0.0794586	0.510593	0.195876
cg06809298	6	75953853	COX7A2	1.60326e-10	<1.0E-50	-0.0870596	-0.101497	0.0724714	0.0818611	0.761091	0.803104
cg22105158	19	3480672	C19orf77	1.6537e-10	<1.0E-50	0.0549921	0.0521537	0.0861764	0.0782295	0.75205	0.601434
cg24990494	13	32520050	EEF1DP3	1.67284e-10	<1.0E-50	0.104496	0.0881273	0.0755678	0.0618123	0.00987229	0
cg14858616	10	72219819	NODAL	1.69462e-10	2.3899e-10	-0.0192695	-0.0313202	0.0384068	0.0723322	0.640666	0.726782
cg23233843	4	41878739	TMEM33	1.70687e-10	1.71476e-09	-0.0443574	-0.0669966	0.0336079	0.0708663	0.579347	0.407445
cg21386414	1	26421349	PDIK1L	1.81599e-10	<1.0E-50	-0.035969	-0.0426154	0.0667079	0.0756861	0.639512	0.594218
cg00825462	1	100435485	SLC35A3	1.83878e-10	7.74228e-09	-0.0108839	-0.0161332	0.0215616	0.0606908	0.00402911	0.024565
cg15035382	19	40728255	CNTD2	2.02843e-10	6.66134e-16	0.0454623	0.0486619	0.0606502	0.0704577	0.470647	0.443893
cg23097139	15	75918757	SNUPN	2.05542e-10	1.29896e-13	-0.0224849	-0.028114	0.0499318	0.0705761	0.444658	0.577511
cg02297043	1	75590912	LHX8	2.05644e-10	<1.0E-50	-0.0757902	-0.0631985	0.132054	0.0775646	0.734399	0.596562
cg24477309	12	109730121	FOXN4	2.14209e-10	2.02987e-09	-0.017954	-0.0278641	0.0320271	0.0674099	0.365822	0.571587
cg10806820	3	48699090	CELSR3	2.19019e-10	1.33733e-08	0.0203902	0.0350798	0.0263312	0.0659469	0.403539	0.215385
cg04015777	13	103426481	TEX30	2.24925e-10	3.035e-09	-0.0283969	-0.0435927	0.0321946	0.0706317	0.438984	0.485339
cg02162897	2	38300537	CYP1B1	2.33968e-10	<1.0E-50	-0.0636852	-0.0686923	0.0691439	0.0783388	0.550714	0.712724
cg18877667	17	48051089	DLX4	2.37677e-10	5.14588e-11	-0.0209581	-0.0291692	0.0404206	0.068155	0.589648	0.671321
cg26340700	1	231663886	TSNAX	2.42261e-10	1.39888e-14	-0.0281439	-0.0364355	0.052477	0.0665887	0.41116	0.42713
cg25629768	19	2428567	LMNB2	2.48912e-10	<1.0E-50	-0.0627855	-0.0655201	0.0751907	0.0737895	0.698384	0.782
cg02282631	5	42953543	LOC648987	2.72669e-10	<1.0E-50	-0.086181	-0.0744291	0.110084	0.0735085	0.642961	0.651309
cg08369368	5	176559881	NSD1	2.9727e-10	<1.0E-50	-0.0596325	-0.0656756	0.0549098	0.0683249	0.353422	0.52859
cg08947181	1	40150278	HPCAL4	2.97558e-10	1.08733e-11	-0.0290208	-0.0477189	0.0421103	0.0734503	0.623697	0.469303
cg07630564	3	128445061	RAB7A	3.02549e-10	<1.0E-50	-0.0178762	-0.0184976	0.0583601	0.0592632	0.0704908	0.0337769
cg09886641	15	69223018	SPESP1	3.24222e-10	<1.0E-50	-0.0532893	-0.0632963	0.0709439	0.0708027	0.667272	0.55
cg06881093	2	114035983	PAX8	3.25115e-10	3.73057e-11	-0.0288385	-0.0399408	0.0404012	0.0749353	0.599706	0.765432
cg19893929	2	16105823	MYCN	3.45033e-10	1.33717e-10	0.0227223	0.0347757	0.036964	0.0670544	0.461124	0.52019
cg12130768	17	9550545	USP43	3.6329e-10	1.33005e-13	-0.032165	-0.0431104	0.0507777	0.0749812	0.644074	0.707212
cg27479634	12	54070545	ATP5G2	3.7252e-10	3.18412e-13	-0.026627	-0.0329934	0.0485904	0.0676529	0.513775	0.728601
cg00918917	17	61819349	STRADA	3.91109e-10	1.00364e-13	-0.0291773	-0.0342604	0.0391454	0.057205	0.00298287	0.10202
cg03405139	2	69614107	GFPT1	3.95719e-10	<1.0E-50	-0.0297782	-0.0253904	0.0672043	0.0588347	0.02118	0.0546392
cg15194935	19	10405955	ICAM5	3.98862e-10	8.31707e-08	-0.0204541	-0.0360758	0.0282968	0.0755183	0.719173	0.423433
cg23008871	17	45949743	SP6	3.99146e-10	<1.0E-50	-0.0618892	-0.0583693	0.0836288	0.0762882	0.557879	0.783991
cg15069551	20	25128695	LOC284798	4.17816e-10	1.21458e-13	-0.0290418	-0.0370162	0.049098	0.0709757	0.551952	0.308108
cg15255455	19	4534986	PLIN5	4.27628e-10	8.9418e-11	-0.0259764	-0.0393773	0.0401414	0.076197	0.669747	0.633696
cg23801021	11	72353434	PDE2A	4.38544e-10	<1.0E-50	-0.0392687	-0.0340729	0.0753915	0.0572416	0.0989244	0.0726714
cg02311932	6	17282853	RBM24	4.40677e-10	1.55431e-15	-0.0285205	-0.0306285	0.0571824	0.0684797	0.479209	0.737263
cg14482569	11	130185651	ZBTB44	4.43891e-10	<1.0E-50	-0.0833932	-0.0906992	0.0694007	0.0786978	0.641339	0.567073
cg25034424	4	1513089	CRIPAK	4.50243e-10	<1.0E-50	0.118812	0.121037	0.0745334	0.071666	0.819468	0.599806
cg14554415	15	69222988	NOX5	4.67955e-10	<1.0E-50	-0.0767382	-0.0818379	0.0717778	0.0701352	0.764376	0.61477
cg02757970	2	25427350	DNMT3A	4.82855e-10	<1.0E-50	-0.0373004	-0.0429335	0.0628871	0.0706848	0.548316	0.588098
cg05867884	5	1246291	SLC6A18	4.96207e-10	8.17124e-14	0.0387336	0.0464366	0.0545795	0.0711091	0.736722	0.44713
cg03634479	10	18430412	CACNB2	4.98961e-10	2.73834e-10	0.0375323	0.0556287	0.0369437	0.0746204	0.633771	0.726708
cg00940977	2	174877447	SP3	5.0612e-10	1.11022e-15	-0.0365306	-0.043884	0.0625611	0.0716107	0.633875	0.554859
cg15283852	17	9550296	USP43	5.20847e-10	1.01283e-10	-0.0444164	-0.0643879	0.0367543	0.0657935	0.325042	0.390319
cg03298305	19	55972791	ISOC2	5.38933e-10	<1.0E-50	0.0598949	0.0703759	0.0682825	0.0735514	0.67109	0.253036
cg05473871	19	1513513	ADAMTSL5	5.53277e-10	9.39886e-11	0.0240941	0.0383943	0.0375067	0.0738725	0.600876	0.140167
cg08828723	6	32165176	NOTCH4	5.56091e-10	2.39364e-09	-0.0337354	-0.0472002	0.031544	0.0718941	0.628032	0.484234
cg06861037	16	50278918	PAPD5	5.77024e-10	<1.0E-50	-0.0267266	-0.0236567	0.0633855	0.0617081	0.36649	0.270483
cg24016626	11	119242685	USP2	5.93827e-10	3.36398e-13	-0.0198036	-0.0232816	0.0440029	0.0657191	0.396385	0.40825
cg06239208	20	42543422	TOX2	6.04206e-10	<1.0E-50	-0.025766	-0.0263695	0.057981	0.0558785	0.0270219	0.0899001
cg20401945	16	29912460	ASPHD1	6.38335e-10	<1.0E-50	-0.0356861	-0.0379975	0.0798306	0.0695139	0.745223	0.681957
cg00871698	14	53417998	FERMT2	6.3907e-10	2.62013e-14	-0.0198869	-0.0205851	0.0415292	0.0546433	0.0793326	0.382382
cg20228731	7	130646051	FLJ43663	6.40173e-10	3.7208e-12	-0.0497229	-0.0627305	0.0451685	0.068851	0.673123	0.722157
cg01952185	5	134813213	TIFAB	6.42133e-10	5.55112e-15	-0.0351911	-0.0402364	0.0539485	0.0720869	0.580367	0.782093
cg16736826	1	41951512	EDN2	6.51762e-10	3.1127e-09	-0.0107515	-0.0162669	0.0300108	0.0554808	0.3554	0.477356
cg25001930	1	147801789	NONE(dist=NONE)	6.71078e-10	2.058e-07	-0.0362011	-0.0668396	0.0264471	0.0696654	0.759585	0.62747
cg14266237	19	12995624	KLF1	7.06888e-10	<1.0E-50	-0.11028	-0.0855299	0.127306	0.0753954	0.75811	0.266241
cg05590616	11	59522917	STX3	7.28519e-10	8.88178e-16	-0.0170542	-0.0182965	0.0451509	0.0543508	0	0
cg24049493	1	42385941	HIVEP3(dist=1562)	7.52589e-10	1.05033e-08	0.0411546	0.0643127	0.0307307	0.0692104	0.702623	0.727542
cg14074251	2	220299116	SPEG	7.65936e-10	2.79623e-09	-0.0245253	-0.0374818	0.0365458	0.0693142	0.610169	0.725894
cg10432947	4	2062441	NAT8L	7.66935e-10	<1.0E-50	-0.0510758	-0.0484724	0.0850664	0.0718931	0.753997	0.82721
cg25571880	2	233384489	PRSS56	7.73165e-10	6.66134e-16	-0.0305763	-0.0355428	0.0598959	0.0626441	0.703984	0.788223
cg21378403	10	102777924	PDZD7	7.80905e-10	3.24185e-14	-0.0264094	-0.0305476	0.0551774	0.0744755	0.656311	0.737773
cg20050113	2	103236861	SLC9A2	7.84832e-10	<1.0E-50	-0.0489799	-0.0469322	0.095452	0.074211	0.732127	0.427996
cg03292743	2	74642838	C2orf81	7.92382e-10	<1.0E-50	-0.0397782	-0.0455109	0.0696832	0.069366	0.739872	0.466736
cg13598010	7	72838776	FZD9	8.15124e-10	<1.0E-50	-0.0518825	-0.0522239	0.0631903	0.0662278	0.386979	0.500917
cg25726513	4	1340596	UVSSA	8.22655e-10	3.59712e-14	-0.0193795	-0.0224819	0.0413726	0.0511141	0.0404445	0.0112821
cg00719651	12	47225449	SLC38A4	8.23319e-10	<1.0E-50	-0.0322671	-0.0282845	0.0795867	0.0595428	0.0924617	0.0287474
cg01963297	1	154841980	KCNN3	8.54077e-10	6.1614e-11	0.0209822	0.0305162	0.0418389	0.0702416	0.725698	0.646341
cg12273319	19	50861262	NAPSA	8.62937e-10	<1.0E-50	0.0728571	0.0793351	0.0760453	0.0691747	0.768239	0.496496
cg13230424	17	45930033	SP6	8.76057e-10	<1.0E-50	-0.0491698	-0.0515659	0.0724081	0.0721523	0.651176	0.51806
cg06586599	19	7587541	MCOLN1	8.8517e-10	1.9984e-15	-0.0148247	-0.0176114	0.0413268	0.0545574	0	0
cg02179982	22	46365647	WNT7B	9.12521e-10	<1.0E-50	-0.0407415	-0.0401783	0.0919171	0.0678303	0.700602	0.564211
cg15620114	10	91296457	SLC16A12	9.3539e-10	3.9968e-15	-0.0648103	-0.0748259	0.0594367	0.0695341	0.607319	0.464072
cg13655082	9	125109046	MRRF	9.51129e-10	<1.0E-50	-0.0352873	-0.036546	0.0766519	0.0717427	0.576725	0.657303
cg19529472	8	143534954	BAI1	9.51479e-10	1.55431e-15	-0.026434	-0.0282336	0.0569311	0.0639979	0.356942	0.426402
cg00153101	1	2431753	PLCH2	9.73013e-10	<1.0E-50	-0.0329647	-0.0307455	0.108404	0.0690396	0.625472	0.577244
cg27053299	13	100548780	CLYBL	1.0048e-09	<1.0E-50	-0.0765861	-0.0649794	0.0995238	0.0717132	0.721194	0.447791
cg08950537	10	95361933	RBP4	1.00585e-09	3.31486e-08	-0.0333624	-0.0551255	0.0298278	0.0661522	0.617047	0.689979
cg13183298	1	2376119	PLCH2	1.03548e-09	3.91882e-11	0.0202009	0.0266262	0.0372505	0.0681013	0.556539	0.565079
cg23046934	18	77154321	NFATC1	1.03595e-09	2.22045e-16	0.031094	0.0314704	0.0597964	0.0590389	0.445262	0.59285
cg16743289	1	174968144	CACYBP	1.09514e-09	6.07076e-10	-0.0229547	-0.0370147	0.0372573	0.0693383	0.621797	0.708114
cg00765254	10	103815936	C10orf76	1.18928e-09	5.24467e-11	-0.0638601	-0.0869674	0.029042	0.0493787	0	0
cg09786098	16	3016378	KREMEN2	1.21082e-09	<1.0E-50	-0.0831988	-0.0881004	0.0741833	0.072571	0.779348	0.436436
cg23278365	10	6187284	PFKFB3	1.24578e-09	4.98101e-09	-0.0160831	-0.0240389	0.0241816	0.0550583	0	0
cg19766489	1	78511344	GIPC2	1.26831e-09	3.9968e-14	-0.0401144	-0.052478	0.0550235	0.0720551	0.708825	0.612348
cg25704749	2	241526252	CAPN10	1.26893e-09	1.00291e-11	-0.0144976	-0.0171132	0.0330296	0.0565658	0.0643611	0
cg25362652	6	106429769	PRDM1	1.29929e-09	<1.0E-50	-0.0549858	-0.0500533	0.106054	0.065156	0.708168	0.774648
cg03127244	6	33245638	B3GALT4	1.30495e-09	1.93636e-11	-0.0189976	-0.0261991	0.0421807	0.0695399	0.549315	0.716467
cg02510471	12	54368639	HOTAIR	1.38077e-09	<1.0E-50	-0.0273303	-0.0241711	0.0735311	0.0627242	0.387235	0
cg03089475	11	130030459	ST14	1.38224e-09	4.74102e-09	-0.0192052	-0.0308984	0.027392	0.0592846	0.307732	0.302646
cg17286244	15	69222592	MIR548H4	1.40842e-09	2.22045e-16	-0.0512827	-0.0589055	0.066467	0.0676528	0.754559	0.5625
cg05072008	7	50518647	FIGNL1	1.49899e-09	7.30882e-12	-0.0442149	-0.062319	0.0458246	0.0721284	0.699059	0.449231
cg02971546	4	8200774	SH3TC1	1.50308e-09	1.17169e-10	-0.0207981	-0.0236595	0.0353367	0.0597619	0.221312	0.200684
cg13929323	9	114364066	LRRC37A5P	1.53212e-09	1.35847e-11	-0.049089	-0.060054	0.0380967	0.0689444	0.304021	0.624444
cg01891818	17	73008509	ICT1	1.53418e-09	8.88178e-16	-0.0280572	-0.0321976	0.0576929	0.0679727	0.401112	0.407654
cg13125506	9	68299110	LOC642236	1.54862e-09	<1.0E-50	-0.0653148	-0.0594008	0.0819458	0.0691997	0.592491	0.488956
cg12094552	21	46449961	LINC00162	1.55546e-09	1.33305e-10	-0.0239529	-0.0270817	0.0371404	0.0604508	0.463731	0.354526
cg20225999	2	218843435	TNS1	1.55751e-09	<1.0E-50	0.0783381	0.0785975	0.065634	0.0718129	0.727596	0.799197
cg27282281	7	112262583	LSMEM1	1.59469e-09	<1.0E-50	-0.0660637	-0.0673208	0.0722835	0.0702746	0.722562	0.694359
cg12613020	5	134881662	NEUROG1	1.59846e-09	7.01689e-08	-0.021897	-0.0346206	0.0268926	0.0686789	0.680025	0.776423
cg18041277	8	57030824	MOS	1.60095e-09	<1.0E-50	-0.0864872	-0.0893247	0.0730751	0.0555142	0.539979	0.581623
cg15502465	1	45250440	BEST4	1.60271e-09	1.90474e-11	-0.0133128	-0.0184689	0.0404315	0.0630374	0.472358	0.341899
cg07121722	11	662523	DEAF1	1.61792e-09	6.66134e-16	0.0264117	0.0199591	0.0429423	0.0520627	0.011882	0
cg05227350	11	130185670	ZBTB44	1.62201e-09	<1.0E-50	-0.0649196	-0.0669999	0.0737021	0.0736886	0.676887	0.590909
cg05593775	10	102778743	PDZD7	1.6275e-09	1.19904e-14	-0.0286287	-0.0318806	0.0550015	0.071712	0.583525	0.665188
cg09660145	16	3018104	KREMEN2	1.6745e-09	8.88178e-16	-0.0594543	-0.0755413	0.0585719	0.0717551	0.667064	0.452772
cg12347757	7	139779027	JHDM1D	1.67795e-09	1.50102e-13	-0.02212	-0.0235117	0.0435589	0.0583931	0.304409	0.243792
cg18959207	10	18549686	CACNB2	1.68341e-09	2.78111e-08	-0.031854	-0.0496714	0.0312215	0.0717164	0.645456	0.768854
cg17850088	1	150119278	VPS45	1.68422e-09	1.61595e-08	0.0230051	0.0338213	0.0226613	0.0560743	0.0755092	0.278846
cg23586959	20	30073209	LINC00028;REM1	1.6922e-09	<1.0E-50	-0.0463799	-0.0488148	0.0627368	0.0683886	0.603591	0.236603
cg23469878	9	139640884	LOC100128593	1.74044e-09	4.89022e-10	-0.0290004	-0.0448383	0.038215	0.0714059	0.757258	0.733491
cg17375267	19	46915776	CCDC8	1.80839e-09	<1.0E-50	-0.0417319	-0.0469914	0.0898213	0.0680753	0.654635	0.751229
cg27164797	6	57038231	BAG2	1.86609e-09	2.19824e-14	-0.0632166	-0.082458	0.0534625	0.0665277	0.579817	0.600802
cg27532171	1	46952054	DMBX1	1.89893e-09	1.50458e-09	-0.026454	-0.0412059	0.0351593	0.0716887	0.61477	0.748441
cg00690609	10	72218900	NODAL	1.93382e-09	4.44089e-16	-0.0344275	-0.0349404	0.0597816	0.0671863	0.492072	0.684994
cg03737691	20	62681064	SOX18	1.94509e-09	1.77636e-14	-0.0107658	-0.0119512	0.0440952	0.055935	0.109072	0.144016
cg20398132	2	220324649	SPEG	1.9689e-09	9.42546e-08	-0.020148	-0.0366078	0.0273963	0.0674517	0.658553	0.686117
cg17091577	6	30854233	DDR1	1.97101e-09	5.47247e-11	-0.0327763	-0.0469159	0.0438491	0.0728785	0.789427	0.831992
cg17105139	2	74729279	LBX2	2.00839e-09	3.9827e-10	-0.0255607	-0.0408711	0.0366007	0.0704586	0.632757	0.751606
cg01077724	1	75590483	LHX8	2.0088e-09	<1.0E-50	-0.0657831	-0.056317	0.0876682	0.0728246	0.721136	0.490394
cg00442658	21	18885041	CXADR	2.01858e-09	<1.0E-50	-0.0431473	-0.0295001	0.0930001	0.0541587	0.0920103	0.0836694
cg04065086	1	151104186	SEMA6C	2.21687e-09	7.04929e-11	-0.0237671	-0.0312375	0.0377684	0.0648704	0.517641	0.629673
cg00881300	15	41219486	DLL4	2.23843e-09	2.44249e-15	-0.0140594	-0.0154522	0.0530534	0.0621563	0.447229	0.397163
cg18773223	9	131549619	TBC1D13	2.26246e-09	1.64535e-10	-0.0145267	-0.0201968	0.0270742	0.0547405	0	0.0678138
cg23522872	5	8458392	LOC100505738	2.30272e-09	3.16436e-12	-0.0621295	-0.0772434	0.0472016	0.0675722	0.786413	0.520492
cg02876326	19	46995757	PNMAL2	2.38563e-09	4.50751e-14	-0.05034	-0.0594377	0.053119	0.0666968	0.729144	0.719598
cg16081457	12	81103680	MYF6	2.39373e-09	1.9762e-14	-0.0466064	-0.0583625	0.0522887	0.0683033	0.660236	0.853125
cg01043616	12	50475035	ASIC1	2.40144e-09	<1.0E-50	-0.0392843	-0.0398393	0.0654027	0.0644117	0.617476	0.677287
cg07355745	6	27571093	LOC100507173	2.42746e-09	9.36362e-13	0.0419268	0.0512619	0.0433584	0.0608993	0.493884	0.502988
cg00002837	1	44513358	SLC6A9	2.43725e-09	2.76785e-10	-0.0260256	-0.0334395	0.0334257	0.0612724	0.349891	0.455944
cg23689428	2	121223964	LOC84931	2.50852e-09	1.42477e-11	-0.047576	-0.0604844	0.0446237	0.0662515	0.695249	0.822813
cg04056179	2	198380384	MOB4	2.51909e-09	1.82077e-14	-0.0314887	-0.0318534	0.0389984	0.0507625	0	0.0443102
cg18315060	6	41374532	NCR2	2.52112e-09	8.64537e-08	-0.0418953	-0.0655111	0.0257123	0.0636393	0.653774	0.848205
cg17624536	6	106440910	PRDM1	2.60601e-09	<1.0E-50	-0.0484292	-0.0517876	0.0651107	0.0657827	0.614001	0.75
cg11078358	6	71377548	SMAP1	2.63247e-09	1.42109e-14	-0.0512506	-0.0521262	0.0414819	0.048619	0.0660106	0
cg13349472	2	25427451	DNMT3A	2.64589e-09	6.95e-14	-0.0326301	-0.0404891	0.0548199	0.0685419	0.645025	0.701357
cg03465891	6	45389953	RUNX2	2.78643e-09	1.01696e-13	-0.0136494	-0.0161874	0.0434834	0.0528202	0.122	0.0862588
cg03122264	6	127797208	SOGA3	2.78782e-09	<1.0E-50	-0.0482994	-0.0449677	0.0704425	0.0558531	0.501156	0.53012
cg08167066	2	10220455	CYS1	2.8858e-09	1.26557e-11	-0.0366795	-0.0510715	0.0322337	0.0509429	0.0156723	0.282103
cg16604218	1	45452605	EIF2B3	3.10712e-09	<1.0E-50	-0.0536043	-0.0576634	0.0771895	0.0704715	0.708701	0.37037
cg12692314	6	28642279	SCAND3	3.18534e-09	1.01918e-11	0.0214382	0.0280572	0.0372655	0.0596202	0.258589	0.297896
cg07187855	6	30854161	DDR1	3.19281e-09	3.04043e-11	-0.0543689	-0.0760542	0.0429836	0.0697069	0.804868	0.841463
cg25240254	19	56000944	SSC5D	3.1939e-09	1.34248e-11	-0.033559	-0.0428911	0.0456412	0.0630039	0.720612	0.734123
cg17052170	8	144099482	LOC100133669	3.22646e-09	2.22045e-16	-0.0591543	-0.0632516	0.0636378	0.0688095	0.748418	0.808696
cg22993195	3	49756301	AMIGO3	3.35266e-09	4.06544e-09	-0.0389108	-0.0577623	0.0345472	0.0652362	0.69962	0.527149
cg25347941	22	43486472	TTLL1	3.37763e-09	2.18936e-13	-0.0217039	-0.0226822	0.0427189	0.0652134	0.32868	0.468657
cg02891686	4	24801425	SOD3	3.45201e-09	<1.0E-50	-0.0388843	-0.0351433	0.0799415	0.0633006	0.600004	0.554527
cg15656686	6	30854551	DDR1	3.47924e-09	1.91732e-08	-0.0249132	-0.0407134	0.0328543	0.0696444	0.773634	0.786228
cg17758363	20	13199787	ISM1	3.49774e-09	<1.0E-50	-0.0504764	-0.0519674	0.0663151	0.0624739	0.562908	0.558289
cg22677715	2	162284644	TBR1	3.50825e-09	1.16795e-13	-0.0378229	-0.045042	0.0467462	0.063116	0.451178	0.598335
cg10600889	17	37123767	FBXO47	3.69687e-09	8.83738e-14	-0.0593121	-0.0751176	0.056088	0.0696065	0.682052	0.496343
cg13790576	9	139640661	LOC100128593	3.80394e-09	1.0399e-09	-0.0255492	-0.0357218	0.0364667	0.0667826	0.570955	0.64359
cg24010336	19	39467258	FBXO17	3.89247e-09	<1.0E-50	-0.0504079	-0.0407229	0.118022	0.0673503	0.63614	0.748479
cg18174881	14	45723353	MIS18BP1	4.23112e-09	<1.0E-50	-0.072096	-0.0669663	0.0822988	0.0660304	0.718956	0.520284
cg01497154	20	3661910	ADAM33	4.26985e-09	1.6658e-07	-0.0191074	-0.0337902	0.0273081	0.0641947	0.67964	0.678571
cg22589745	3	33138276	GLB1	4.33488e-09	8.88178e-15	-0.0249111	-0.0265075	0.0451988	0.0499937	0.124003	0.0241449
cg17200690	6	33245619	B3GALT4	4.52948e-09	6.16263e-12	-0.0164656	-0.023121	0.0438323	0.0669096	0.538014	0.641469
cg04974775	5	114516854	TRIM36	4.57275e-09	<1.0E-50	-0.0691222	-0.0724521	0.0800908	0.0634371	0.61629	0.268718
cg14548858	2	164331602	FIGN	4.59972e-09	<1.0E-50	-0.0358853	-0.0360493	0.0621391	0.0624936	0.421064	0.0597701
cg16755220	16	12070685	SNX29	4.62846e-09	1.63203e-13	-0.0153597	-0.0174351	0.0366824	0.0481929	0.0135046	0.080203
cg05373875	20	18485171	SEC23B	4.63294e-09	1.77636e-15	-0.054841	-0.0606567	0.0608648	0.0697997	0.641849	0.480243
cg03059991	12	54144785	CALCOCO1	4.65897e-09	2.22045e-16	-0.0352799	-0.0349556	0.0544603	0.0602212	0.354303	0.374795
cg26256521	14	105147537	MIR4710	4.68816e-09	2.56684e-13	-0.0243867	-0.0274356	0.0425364	0.0515797	0.241998	0.110333
cg05806645	8	9009352	PPP1R3B	4.80663e-09	6.27849e-11	-0.0703109	-0.0958715	0.04326	0.0598147	0.675798	0.373253
cg20366479	2	217501125	IGFBP2	4.87044e-09	1.33316e-12	-0.0365789	-0.0466806	0.0457039	0.0626288	0.581619	0.715
cg03765423	3	194014481	LOC100131551	4.9273e-09	1.6613e-07	-0.0256895	-0.0434592	0.0300644	0.0687304	0.66139	0.720264
cg26833936	1	91303028	ZNF644	5.01301e-09	<1.0E-50	-0.0540738	-0.0488316	0.0906434	0.0662077	0.613648	0.210744
cg14431573	15	52405019	BCL2L10	5.02183e-09	6.90736e-12	-0.0294351	-0.0382286	0.0438989	0.0605253	0.625656	0.478615
cg15537254	20	30073399	LINC00028;REM1	5.065e-09	<1.0E-50	-0.0543544	-0.0499202	0.103507	0.0641542	0.716064	0.617822
cg14027204	1	117529478	PTGFRN	5.27003e-09	2.07456e-08	0.0178954	0.0238533	0.028327	0.0606857	0.42238	0.321888
cg12233487	20	2517085	TMC2	5.27619e-09	5.57272e-09	-0.0374372	-0.0588971	0.0320427	0.066322	0.694536	0.660914
cg26600192	16	67209296	NOL3	5.3097e-09	6.03073e-13	-0.0280477	-0.0313845	0.0451796	0.0602916	0.321506	0.302439
cg03578951	1	44678791	DMAP1	5.33735e-09	4.35971e-11	-0.0390523	-0.0499907	0.0419565	0.065003	0.430215	0.151175
cg06942197	17	38804076	SMARCE1	5.43902e-09	1.27245e-11	-0.0153016	-0.0204745	0.0300607	0.0530105	0.0045893	0.166667
cg12277310	1	71546648	ZRANB2	5.47085e-09	1.92557e-12	-0.014364	-0.0214393	0.0364268	0.0572776	0.0624355	0
cg22905968	19	40931262	SERTAD1	5.51827e-09	6.74749e-12	-0.0237487	-0.0321289	0.0290563	0.0506554	0.0552658	0
cg06226630	4	48493420	ZAR1	5.59628e-09	<1.0E-50	-0.0372284	-0.0372699	0.0697222	0.0588761	0.514562	0.61621
cg15006681	22	38199759	H1F0	5.65528e-09	3.10862e-15	-0.0237467	-0.0306505	0.05508	0.0622203	0.483683	0.592105
cg20544410	17	21117924	TMEM11	5.81182e-09	3.77476e-15	-0.0145336	-0.0162592	0.0443387	0.0465279	0.0258506	0.160121
cg00138126	20	56286697	PMEPA1	5.98785e-09	<1.0E-50	-0.0185276	-0.0169935	0.0715266	0.0564349	0.31329	0.414773
cg21121843	4	3203982	HTT	5.99173e-09	8.41549e-14	-0.0347369	-0.03901	0.0476472	0.0570391	0.339196	0.576617
cg08726667	16	28573379	CCDC101	5.99948e-09	1.10978e-12	-0.0207741	-0.0234927	0.0439538	0.0609538	0.302695	0.465718
cg20292636	1	204328377	PLEKHA6	6.52248e-09	<1.0E-50	-0.0242662	-0.0216044	0.0698564	0.062479	0.434248	0.628319
cg07747553	22	35935982	RASD2	6.52797e-09	8.67667e-08	-0.0136811	-0.0218015	0.0257756	0.0633348	0.502955	0.509872
cg10516146	17	37897246	GRB7	6.88697e-09	3.56034e-08	-0.0184648	-0.0344849	0.0295784	0.0627662	0.65717	0.651786
cg13796381	9	139872395	PTGDS	6.94123e-09	5.51337e-13	-0.028554	-0.0384816	0.0457439	0.0656815	0.567011	0.535342
cg20559217	11	126173516	DCPS	7.07975e-09	2.66075e-08	-0.0477518	-0.073372	0.0297585	0.0556869	0.574431	0.578732
cg04874129	16	55690873	SLC6A2	7.30233e-09	1.11022e-15	-0.0235248	-0.0261653	0.0562825	0.0588853	0.415155	0.350161
cg03721978	6	33245706	B3GALT4	7.42822e-09	2.5467e-11	-0.0145243	-0.0193741	0.0413537	0.0635285	0.465942	0.576087
cg08291506	15	89525620	MFGE8	7.51188e-09	5.9952e-15	-0.0203325	-0.0213605	0.0560601	0.0632859	0.549359	0.308943
cg08080985	9	77703079	NMRK1	7.63642e-09	2.5187e-10	-0.0163167	-0.0205336	0.0284754	0.045787	0.0287409	0.0211694
cg18990042	12	48399169	COL2A1	7.71347e-09	1.97716e-08	-0.0225154	-0.0377266	0.0277583	0.0543722	0.648894	0.635081
cg16530382	17	37123671	FBXO47	7.90512e-09	1.33011e-10	-0.0548327	-0.0782887	0.0407556	0.0692062	0.714125	0.414183
cg20912205	3	50337305	HYAL3	8.20589e-09	6.95792e-09	-0.0142074	-0.0188419	0.0304108	0.0599471	0.332899	0.557487
cg11855943	17	47964664	FLJ45513	8.31487e-09	5.5597e-10	-0.0159155	-0.0234084	0.0384121	0.0580867	0.629706	0.608479
cg21292909	19	50059937	NOSIP	8.35197e-09	<1.0E-50	0.0951186	0.0876489	0.0691349	0.0620544	0.454954	0.561905
cg18147048	19	2428677	LMNB2	8.39552e-09	5.59552e-14	-0.086499	-0.0956651	0.0526742	0.0596498	0.577851	0.651139
cg23484899	1	244894365	DESI2	8.55937e-09	1.90514e-13	-0.0304374	-0.0356955	0.0498216	0.0582331	0.479219	0.474407
cg14660007	13	78271894	SLAIN1;MIR3665	8.5804e-09	4.00291e-08	-0.0120608	-0.0186885	0.022309	0.0551856	0.236382	0.518744
cg14510926	2	174877357	SP3	8.5938e-09	9.99201e-15	-0.0233108	-0.0279186	0.0568686	0.058584	0.620749	0.527233
cg26958615	6	27206664	PRSS16	8.63234e-09	6.88338e-15	-0.0449461	-0.0502097	0.0527817	0.0627446	0.445854	0.338129
cg19398269	6	28678460	SCAND3	8.69309e-09	<1.0E-50	-0.0451964	-0.0453553	0.0665296	0.0544567	0.602019	0.628571
cg09808235	1	2542588	MMEL1	8.74142e-09	5.1581e-13	0.0453423	0.0489603	0.0492981	0.0610397	0.652536	0.377399
cg09578319	17	4900256	INCA1	8.77028e-09	<1.0E-50	-0.0282019	-0.0276639	0.0975837	0.0610686	0.69963	0.660236
cg15310583	11	79147752	TENM4	8.86283e-09	1.53535e-09	-0.0300659	-0.0463313	0.0367427	0.0614734	0.79794	0.414487
cg01870865	3	48507087	TREX1	8.93036e-09	3.31335e-12	-0.0225325	-0.0263915	0.0427233	0.0637105	0.450388	0.202899
cg23138682	14	103801128	EIF5	9.01194e-09	9.08162e-14	-0.0105121	-0.0109607	0.0418214	0.0431531	0.0621875	0.0676768
cg05221720	6	70991229	COL9A1	9.11985e-09	<1.0E-50	-0.0672029	-0.0499375	0.0931294	0.0567693	0.628607	0.477296
cg17967673	19	38040009	LOC100507433	9.39259e-09	1.77636e-15	-0.0713421	-0.0728503	0.0558636	0.0610167	0.588661	0.401015
cg01825213	9	98979965	HSD17B3	9.41356e-09	<1.0E-50	-0.0373146	-0.038621	0.0671252	0.0638828	0.703957	0.757949
cg02902477	6	26197071	HIST1H3D	9.43148e-09	2.08022e-11	0.0323461	0.0399811	0.0346477	0.0541413	0.212488	0.166492
cg14026788	12	72233266	TBC1D15	9.49406e-09	5.55112e-15	-0.0506811	-0.0546986	0.0512628	0.0616944	0.352637	0.0606673
cg14625636	9	100000026	LOC100499484	9.55928e-09	8.12372e-12	-0.056137	-0.0739248	0.0459626	0.0632763	0.716659	0.720885
cg11924019	15	75019283	CYP1A1	9.68736e-09	<1.0E-50	-0.0447844	-0.0365552	0.116117	0.0617204	0.685201	0.717897
cg13854012	2	162103682	TANK	9.69877e-09	8.88178e-16	-0.0768705	-0.0821864	0.0587439	0.0632873	0.673045	0.880762
cg20665157	7	121969421	CADPS2	9.93834e-09	1.88738e-12	-0.0369739	-0.0471114	0.0466439	0.0608972	0.601539	0.318089
cg23687098	2	132152878	LOC389043	1.0002e-08	3.30846e-14	-0.0263465	-0.0293977	0.0517329	0.0540017	0.474299	0.705562
cg19443920	17	40075879	ACLY	1.01992e-08	8.31639e-09	-0.0267315	-0.0416047	0.0339992	0.0624941	0.601196	0.417256
cg02961707	19	7927974	EVI5L	1.02697e-08	1.33227e-15	-0.0756036	-0.0762648	0.0531654	0.054851	0.489217	0.51016
cg12219045	22	44894262	LDOC1L	1.04083e-08	<1.0E-50	0.0227155	0.0269862	0.0478774	0.0446014	0.0556543	0.0628803
cg14399930	17	37123669	FBXO47	1.04724e-08	8.98334e-09	-0.0643691	-0.0984341	0.0311567	0.0661658	0.617316	0.370787
cg04420723	6	27439931	ZNF184	1.05487e-08	7.63573e-08	0.0298932	0.0497958	0.0247388	0.0558759	0.563475	0.555785
cg15548859	1	2381299	PLCH2	1.05655e-08	<1.0E-50	0.0385386	0.0316465	0.093482	0.0681449	0.550173	0.62268
cg16653408	22	42313569	SHISA8	1.08569e-08	<1.0E-50	-0.0419143	-0.0390922	0.10501	0.0659961	0.66626	0.619342
cg23090046	14	104094619	KLC1	1.09994e-08	1.67658e-10	-0.014656	-0.0199956	0.0359353	0.0636939	0.443342	0.3
cg16987606	17	72426469	GPRC5C	1.10114e-08	2.22045e-16	-0.0291347	-0.031827	0.0553348	0.0588915	0.40696	0.550535
cg16045390	17	37896620	GRB7	1.10535e-08	3.04095e-11	-0.0181454	-0.0266024	0.0427248	0.0620254	0.688666	0.846975
cg15511801	10	88296171	WAPAL	1.11202e-08	1.61175e-07	-0.0211058	-0.0316663	0.0251977	0.0626031	0.54785	0.544118
cg17920868	4	71768662	MOB1B	1.15086e-08	<1.0E-50	-0.0178228	-0.0184104	0.0471549	0.054262	0	0
cg05950943	16	2520971	NTN3	1.15992e-08	4.97158e-13	-0.0143204	-0.0165939	0.0441987	0.0585482	0.513214	0.46345
cg01203153	5	180643432	MIR4638	1.16625e-08	2.62932e-11	0.0561275	0.06695	0.0426873	0.0604355	0.67144	0.703883
cg06949812	17	38517993	GJD3	1.17143e-08	1.7092e-09	-0.0182311	-0.0247884	0.0358628	0.0606167	0.69371	0.688124
cg16922763	13	111719172	ARHGEF7	1.17585e-08	4.56905e-10	-0.0408092	-0.0542196	0.0371617	0.0668036	0.725769	0.604251
cg19884634	7	127992634	PRRT4	1.18014e-08	2.22045e-16	-0.0323014	-0.0350894	0.0599451	0.066038	0.645204	0.539515
cg02323356	2	220313153	SPEG	1.18051e-08	4.08695e-09	-0.0185536	-0.0270663	0.0326875	0.0623477	0.562739	0.690141
cg27211408	7	2060130	MAD1L1	1.1839e-08	3.0683e-11	-0.0264937	-0.0358816	0.0379273	0.0665894	0.570423	0.608063
cg13375538	19	12911875	PRDX2	1.19502e-08	1.05049e-12	0.0315221	0.0334528	0.041624	0.0469689	0.397676	0.690294
cg18530324	18	46064992	CTIF	1.23249e-08	1.41794e-08	-0.0163041	-0.0242284	0.0312398	0.0601256	0.478914	0.434635
cg26645709	15	89987792	RHCG	1.26505e-08	4.00408e-10	-0.0238673	-0.0345589	0.0345921	0.0610993	0.691883	0.528711
cg13537156	17	72951218	HID1	1.27127e-08	1.33773e-09	-0.016296	-0.0252097	0.0341074	0.0595261	0.43686	0.57211
cg01433297	20	4151816	SMOX	1.27221e-08	<1.0E-50	-0.0371132	-0.0338125	0.062209	0.0603804	0.416595	0.571759
cg02288964	1	967561	AGRN	1.29217e-08	1.14489e-10	-0.018788	-0.0245961	0.0335865	0.0552235	0.243989	0.280417
cg17237320	3	10053000	LOC401052	1.29581e-08	1.59124e-08	-0.0129317	-0.0184428	0.0228566	0.0481053	0.167834	0.287009
cg12101586	15	75019203	CYP1A1	1.30476e-08	<1.0E-50	-0.0708626	-0.0569774	0.110836	0.0623995	0.677058	0.624486
cg18685071	7	129143261	SMKR1	1.32013e-08	1.84674e-11	-0.0185658	-0.0242352	0.040559	0.0606036	0.418547	0.341048
cg26149485	19	2428350	LMNB2	1.32167e-08	3.77476e-15	-0.0353549	-0.0341508	0.0563016	0.0569647	0.578949	0.728571
cg05820066	16	75145843	LDHD	1.32299e-08	7.99361e-15	-0.0202119	-0.0223921	0.0513057	0.0603386	0.467833	0.4025
cg05398095	1	207224740	YOD1	1.33962e-08	1.18289e-07	0.0329062	0.0516258	0.0248439	0.0598357	0.655909	0.525391
cg06969129	7	5645984	FSCN1	1.36298e-08	8.42028e-08	-0.0149727	-0.0216113	0.0254218	0.0572029	0.360594	0.605817
cg03342928	19	56002446	SSC5D	1.3672e-08	1.77636e-15	-0.0922741	-0.0933769	0.0618396	0.0562738	0.719311	0.619238
cg14540387	15	52404232	BCL2L10	1.36837e-08	8.86055e-10	-0.0254421	-0.0369014	0.0344473	0.0635608	0.607065	0.419287
cg16323609	3	48885591	PRKAR2A	1.37599e-08	9.20806e-11	-0.016151	-0.0204534	0.0392327	0.0540252	0.43532	0.513514
cg03301498	19	39889222	MED29	1.38692e-08	9.45072e-10	-0.0190974	-0.0252341	0.0338462	0.05639	0.434477	0.119632
cg21674927	2	102644247	IL1R2	1.41288e-08	8.05714e-10	-0.0209765	-0.0287274	0.0299665	0.0563717	0.348933	0.187567
cg16345647	21	38378406	DSCR6	1.42688e-08	5.61756e-09	-0.024502	-0.0329773	0.0267723	0.056847	0.365392	0.51467
cg04259752	8	23262159	LOXL2	1.42818e-08	4.44089e-16	-0.0308649	-0.0329804	0.062795	0.059225	0.682681	0.690256
cg13587180	4	42403248	SHISA3	1.46079e-08	<1.0E-50	-0.0908152	-0.0825001	0.0785555	0.0570963	0.72211	0.700483
cg02491754	12	53773040	SP1	1.46194e-08	1.11022e-15	-0.0427882	-0.0436923	0.0561026	0.0565579	0.459653	0.275026
cg04606861	12	132905735	GALNT9	1.46901e-08	9.95262e-11	0.0249348	0.0325965	0.0384377	0.0496187	0.483219	0.380466
cg09357462	10	112259305	DUSP5	1.47616e-08	5.73648e-09	-0.0179929	-0.0280915	0.0323819	0.0604754	0.623219	0.484337
cg01229998	11	60049447	MS4A4A	1.50747e-08	1.55431e-15	-0.0291594	-0.0295551	0.0497293	0.0557463	0.29742	0.591611
cg01191660	1	11024083	C1orf127	1.53478e-08	<1.0E-50	-0.0228365	-0.0202006	0.0566592	0.0460322	0.174504	0.268657
cg16134607	12	56512091	ZC3H10	1.54284e-08	7.99627e-12	-0.0131671	-0.0151085	0.0336961	0.0450525	0.0569372	0.0964824
cg16428357	20	34190258	SPAG4	1.56179e-08	<1.0E-50	-0.0743239	-0.0903326	0.0729902	0.0612488	0.759821	0.412998
cg17818798	19	14228473	PRKACA	1.57921e-08	<1.0E-50	-0.0161861	-0.0149975	0.051116	0.0441281	0.073837	0.0676768
cg01937803	14	103605307	TNFAIP2	1.58793e-08	6.44094e-11	-0.0238222	-0.0324934	0.0429651	0.0620199	0.727956	0.788247
cg05886811	6	17280740	RBM24	1.59092e-08	5.9952e-15	-0.0300209	-0.0340984	0.0547172	0.0560111	0.549035	0.61277
cg21618521	6	33245770	B3GALT4	1.59226e-08	3.5197e-10	-0.0166184	-0.0229825	0.0368871	0.0599626	0.535125	0.644722
cg20703671	17	1396001	MYO1C	1.59902e-08	6.23279e-13	-0.0195704	-0.0234678	0.0473008	0.0621211	0.618035	0.738232
cg26711820	12	81101689	MYF6	1.6052e-08	4.21885e-15	-0.0334099	-0.040329	0.0548085	0.0613087	0.6524	0.675592
cg21084358	17	45918765	SCRN2	1.63354e-08	4.63352e-09	0.0126246	0.0172674	0.0220775	0.0433069	0	0
cg07845392	17	79678158	SLC25A10	1.64266e-08	2.39533e-10	-0.0157418	-0.0209826	0.0384214	0.0598158	0.535749	0.539535
cg00704289	14	21945296	RAB2B	1.64786e-08	3.73035e-14	-0.0206812	-0.0231018	0.0405215	0.0529094	0.0818155	0.120567
cg23105130	8	144799022	MAPK15	1.66887e-08	2.22045e-16	-0.0341005	-0.0344628	0.0556867	0.0564458	0.434302	0.353909
cg17321385	2	132429793	C2orf27A	1.69143e-08	1.48268e-10	-0.015578	-0.0208104	0.0425787	0.0561406	0.622855	0.686584
cg00425710	16	56672671	MT1A	1.7362e-08	6.66134e-16	-0.0360875	-0.0373747	0.0628494	0.0624553	0.705735	0.598947
cg18209359	17	80159595	CCDC57	1.7364e-08	1.12564e-08	0.0543622	0.0687974	0.0313007	0.052267	0.467303	0.721228
cg12763978	6	28601519	SCAND3	1.78688e-08	<1.0E-50	-0.0807516	-0.0754846	0.070752	0.0614718	0.640343	0.473846
cg13877106	11	126173568	DCPS	1.81535e-08	1.31455e-08	-0.0445338	-0.0705668	0.0311334	0.0564656	0.600586	0.562179
cg21550442	19	36499839	SYNE4;ALKBH6	1.83785e-08	1.28786e-14	-0.0342948	-0.0421841	0.0501541	0.0577823	0.380482	0.122543
cg03462733	15	80445229	FAH	1.84304e-08	6.587e-11	-0.0075143	-0.00939437	0.0279588	0.0470126	0	0.00201613
cg11295801	6	150039190	LATS1	1.84818e-08	1.74496e-09	-0.0209503	-0.0286366	0.0238365	0.0460706	0	0
cg00387658	20	54986793	CASS4	1.85028e-08	<1.0E-50	-0.0312463	-0.0258834	0.08404	0.055	0.390436	0.579399
cg13212079	6	28554968	SCAND3	1.86529e-08	2.34071e-08	0.0232192	0.0307663	0.0268323	0.0533959	0.292245	0.305085
cg26619043	17	66287492	ARSG	1.87531e-08	<1.0E-50	-0.0500354	-0.0288096	0.139983	0.0533955	0.112517	0.218069
cg13982688	9	97401505	FBP1	1.89401e-08	4.45819e-11	-0.0236944	-0.0264406	0.0314547	0.0505478	0.118836	0.0462046
cg20212624	17	40123227	CNP	1.89415e-08	4.69603e-10	-0.0180045	-0.0226259	0.0320172	0.0572367	0.285573	0.344633
cg07715777	6	33128963	COL11A2	1.94193e-08	4.41869e-14	-0.0242347	-0.0249295	0.0491371	0.0566838	0.455928	0.548228
cg09093783	5	158636444	RNF145	2.01484e-08	3.47839e-08	-0.0175573	-0.023894	0.0225987	0.0485592	0.107535	0.276249
cg16913064	17	45949878	SP6	2.04359e-08	<1.0E-50	-0.0465393	-0.041502	0.0798355	0.0601969	0.528821	0.70362
cg26153054	2	132152814	LOC389043	2.0503e-08	1.39406e-11	-0.0449312	-0.0541939	0.0414326	0.0539314	0.419566	0.71474
cg17205324	14	23835595	EFS	2.05641e-08	8.75544e-12	-0.0305204	-0.0385799	0.0467008	0.0580452	0.705928	0.833696
cg22529396	2	128293186	MYO7B	2.06729e-08	2.68652e-12	-0.0140174	-0.0166742	0.0380113	0.0508178	0.285737	0.332457
cg04396765	10	76585478	KAT6B	2.08279e-08	1.32006e-12	-0.0197295	-0.0204565	0.0358869	0.0453897	0.0855121	0.0404858
cg07004999	7	155283140	CNPY1	2.10317e-08	5.19584e-14	-0.0266216	-0.0311644	0.0525621	0.0616797	0.721145	0.568856
cg08885201	16	69419692	TERF2	2.12081e-08	2.18416e-10	-0.0169205	-0.022191	0.0278097	0.0441048	0	0.0688956
cg20153322	12	120703977	PXN	2.13935e-08	<1.0E-50	-0.017042	-0.0145208	0.0855316	0.0605663	0.368038	0.378981
cg06762457	6	149806635	ZC3H12D	2.16542e-08	8.17035e-12	-0.0304687	-0.0368237	0.0464289	0.0562573	0.546476	0.604527
cg27383418	2	232055581	ARMC9	2.1789e-08	1.31056e-09	-0.0167119	-0.0256512	0.0300882	0.0584064	0.437907	0.504202
cg24058386	1	156393917	C1orf61	2.18303e-08	8.15126e-13	-0.0315335	-0.0366472	0.052031	0.0583663	0.734261	0.69883
cg01754713	16	31226334	TRIM72	2.22635e-08	6.0294e-08	-0.0216062	-0.0335549	0.0243231	0.0617119	0.467895	0.670282
cg19793809	5	132166663	SHROOM1	2.34527e-08	6.25056e-13	-0.0161645	-0.019477	0.0511247	0.0612814	0.620289	0.460208
cg19526166	5	110062729	TMEM232	2.44499e-08	1.19904e-14	-0.0644119	-0.0742369	0.0559025	0.0609989	0.665466	0.431514
cg21565496	13	40762150	LINC00332	2.46544e-08	<1.0E-50	0.052228	0.0420608	0.0723285	0.0595239	0.489636	0.230971
cg25646708	3	134031685	AMOTL2	2.47817e-08	4.44089e-16	-0.0500559	-0.0577728	0.0612677	0.0561937	0.747285	0.771134
cg00177243	10	18434068	CACNB2	2.56428e-08	3.22952e-10	0.03513	0.045349	0.0384524	0.0602964	0.635996	0.72028
cg13876135	1	211872318	NEK2	2.57156e-08	3.55271e-15	-0.0370533	-0.0334489	0.0528168	0.0559162	0.3858	0.349946
cg16171484	2	223290515	SGPP2	2.59272e-08	1.03096e-07	-0.0193792	-0.0277415	0.0284533	0.0624449	0.431569	0.587583
cg08108911	1	157015297	ARHGEF11	2.65645e-08	4.16667e-12	-0.0167511	-0.0181262	0.0343293	0.0468079	0.0995872	0.111111
cg17713161	17	72951370	HID1	2.69049e-08	5.11173e-10	-0.0184043	-0.0231744	0.0318891	0.0577694	0.332838	0.516588
cg09846458	19	55972646	ISOC2	2.69902e-08	2.95519e-11	0.0689745	0.0819202	0.0425557	0.058265	0.597106	0.191102
cg11300777	13	109568637	MYO16	2.7342e-08	3.57165e-08	-0.0201651	-0.0301755	0.023498	0.0513995	0.191008	0.38141
cg17515480	19	48049039	ZNF541	2.73483e-08	2.55795e-13	-0.040876	-0.0468569	0.0508444	0.0601041	0.718768	0.618905
cg14484793	9	137978463	OLFM1	2.73723e-08	7.45239e-08	0.0328828	0.0535909	0.02937	0.0557231	0.821297	0.627599
cg14843341	6	42072683	C6orf132	2.75005e-08	7.11968e-10	-0.0200513	-0.0261449	0.0348425	0.0570923	0.389529	0.583431
cg25943719	15	101421391	ALDH1A3	2.79313e-08	3.24185e-14	-0.0405028	-0.0462148	0.0543824	0.0567723	0.565584	0.434872
cg16111190	6	30860887	DDR1	2.82023e-08	1.17246e-11	-0.0232827	-0.0312094	0.0448043	0.0582881	0.62204	0.737219
cg26438105	18	5892119	TMEM200C	2.84096e-08	1.20277e-11	-0.0407935	-0.052262	0.0470495	0.0641235	0.738378	0.513211
cg13477780	7	75897549	SRRM3	2.86292e-08	5.68834e-12	-0.0198752	-0.023353	0.0420572	0.0487874	0.384596	0.492622
cg08900404	7	29605808	PRR15	2.87644e-08	<1.0E-50	0.0650786	0.0542801	0.08143	0.0559301	0.674985	0.769668
cg03930474	12	6772637	ING4	2.91774e-08	2.44249e-15	-0.019081	-0.0214618	0.0429443	0.0442233	0	0
cg05849319	11	65172370	FRMD8	2.95601e-08	1.11022e-15	0.0153937	0.0160678	0.0480533	0.0525142	0.186185	0.259649
cg27466766	8	144679319	EEF1D	2.98217e-08	1.85185e-13	-0.0145225	-0.0145188	0.0341801	0.0418077	0.0121892	0.040404
cg08709672	1	206224334	AVPR1B	2.98282e-08	1.24345e-12	-0.0152019	-0.0176262	0.043182	0.0566188	0.578843	0.60274
cg07820064	2	220299584	SPEG	2.99892e-08	2.04481e-12	-0.019768	-0.0228273	0.0414173	0.0588251	0.370322	0.641774
cg13577407	3	57994372	FLNB	3.05222e-08	4.44089e-16	-0.0245298	-0.0219871	0.0470617	0.0355547	0.103797	0.340704
cg13335886	1	3808127	C1orf174	3.07735e-08	7.72715e-14	-0.0259875	-0.0284782	0.0482338	0.057815	0.498019	0.713933
cg04212926	1	45190912	C1orf228	3.09274e-08	1.66506e-07	0.0266799	0.0392459	0.022723	0.0498828	0.240261	0.446903
cg17204557	2	121223909	LOC84931	3.09945e-08	5.5733e-09	-0.020226	-0.0264466	0.0283441	0.051928	0.312468	0.543991
cg13570656	15	75019196	CYP1A1	3.12204e-08	<1.0E-50	-0.0777031	-0.0599247	0.107548	0.0596253	0.680445	0.594949
cg00419321	1	75593476	LHX8	3.16556e-08	<1.0E-50	-0.071151	-0.0683331	0.0788454	0.0600709	0.714382	0.509824
cg19760250	17	36997627	C17orf98	3.17089e-08	<1.0E-50	-0.104222	-0.107196	0.0643693	0.0535343	0.700821	0.665663
cg20657849	6	28557400	SCAND3	3.18421e-08	4.70797e-08	0.0347109	0.044238	0.0242717	0.0546636	0.243774	0.171748
cg25003472	2	62423149	B3GNT2	3.18921e-08	1.12534e-11	-0.0225888	-0.0275272	0.0316701	0.0426003	0.0105406	0
cg10855746	14	61938004	PRKCH	3.19725e-08	4.66579e-08	-0.0124349	-0.0191163	0.0260124	0.0570386	0.403344	0.34976
cg05017628	19	48698632	CARD8	3.229e-08	<1.0E-50	-0.147805	-0.110486	0.104615	0.0543018	0.688215	0.484879
cg24621042	14	94857275	SERPINA1	3.29637e-08	1.18572e-13	-0.0146587	-0.0167276	0.0494238	0.0469649	0.399102	0.493569
cg27301488	12	132670344	GALNT9	3.4178e-08	1.01646e-09	0.0229776	0.0322076	0.0285626	0.055051	0.384912	0.572423
cg25125298	5	71853215	ZNF366	3.50812e-08	7.54952e-15	-0.0395929	-0.0392074	0.0533446	0.058931	0.590978	0.689498
cg26385222	7	150497077	TMEM176B	3.51696e-08	8.51446e-09	-0.0184447	-0.0272172	0.0320253	0.0557538	0.543645	0.695893
cg17724687	1	7887346	PER3	3.5767e-08	1.28786e-13	-0.104989	-0.11607	0.0533878	0.0540708	0.703561	0.581854
cg26706163	19	59073369	MZF1	3.59039e-08	<1.0E-50	-0.0468756	-0.045334	0.07113	0.0632416	0.687617	0.67119
cg14887613	19	345454	MIER2	3.59594e-08	2.38667e-08	-0.0251459	-0.0384146	0.0319111	0.0582742	0.739939	0.420082
cg04355077	19	50059946	NOSIP	3.61232e-08	<1.0E-50	0.0939025	0.079768	0.0689022	0.0570547	0.430116	0.478528
cg02419920	4	48486785	SLC10A4	3.73199e-08	2.66454e-15	-0.0380253	-0.0399601	0.0553014	0.0613738	0.582118	0.469747
cg05904716	5	179779205	GFPT2	3.73524e-08	9.61742e-10	-0.0413868	-0.055532	0.035058	0.0542763	0.533137	0.556745
cg10010533	11	82445170	FAM181B	3.78194e-08	2.07436e-11	-0.0206286	-0.0259142	0.0442095	0.0563548	0.63384	0.478084
cg03870261	19	2428514	LMNB2	3.91595e-08	4.44089e-16	-0.0463781	-0.0443956	0.0619161	0.0551532	0.677276	0.767206
cg02207638	20	33880049	FAM83C	3.93592e-08	7.33513e-10	-0.0300988	-0.0419852	0.034589	0.0526344	0.476029	0.328313
cg27241845	2	233250370	ECEL1P2	4.10702e-08	9.4369e-14	-0.0325155	-0.0303275	0.0520893	0.0564886	0.516746	0.531633
cg14295062	9	139949108	ENTPD2	4.17756e-08	4.41577e-10	-0.0228569	-0.0280286	0.0374006	0.054049	0.584877	0.610874
cg27567761	10	64573184	EGR2	4.19342e-08	8.64264e-12	-0.0424005	-0.0511233	0.0401645	0.0527255	0.435473	0.266531
cg02931604	6	74064298	DPPA5	4.19475e-08	<1.0E-50	-0.0796432	-0.0596036	0.106433	0.0581087	0.696315	0.552579
cg15928106	7	130646078	FLJ43663	4.21115e-08	1.31829e-10	-0.0441971	-0.0535922	0.0375082	0.0511139	0.558599	0.744898
cg20623052	11	65419955	RELA	4.28104e-08	<1.0E-50	-0.0158489	-0.0158516	0.0529681	0.0442701	0	0.0725806
cg04310331	11	2012332	MRPL23-AS1	4.3349e-08	8.55131e-09	-0.00872237	-0.0128802	0.0278283	0.0463603	0.325252	0.380023
cg23371413	19	57742394	AURKC	4.39228e-08	1.58462e-10	-0.0501624	-0.0646163	0.0424073	0.0595191	0.713306	0.593449
cg00950381	17	74272364	QRICH2	4.40216e-08	5.07508e-08	-0.022021	-0.0312441	0.0283655	0.0528489	0.534372	0.461538
cg16677448	19	36004699	DMKN	4.44207e-08	2.22045e-15	-0.024825	-0.0241738	0.0546361	0.0544475	0.46301	0.601978
cg05317207	19	58867669	ZNF497	4.49466e-08	7.24243e-12	-0.036261	-0.0431809	0.0451328	0.0517048	0.635538	0.501505
cg13420413	1	2347015	PEX10	4.51756e-08	<1.0E-50	-0.0206285	-0.0203416	0.0646164	0.0510518	0.45687	0.544034
cg24328774	6	44537819	CDC5L	4.52468e-08	1.11022e-15	-0.0203632	-0.0192322	0.0548105	0.0575248	0.411216	0.113497
cg07304536	16	86987635	C16orf95	4.63541e-08	1.43302e-10	-0.0447613	-0.05418	0.0390189	0.0538725	0.613949	0.683491
cg16426321	14	93507882	ITPK1	4.6761e-08	6.43929e-13	-0.016343	-0.0182207	0.0442898	0.0520391	0.376584	0.450372
cg14441480	6	32729500	HLA-DQB2	4.68293e-08	5.63993e-14	-0.0544113	-0.0610066	0.0537803	0.055635	0.639769	0.545187
cg26250093	2	24397649	FAM228A	4.70383e-08	1.09964e-10	-0.0592921	-0.0790157	0.038237	0.0495558	0.466701	0.394924
cg15463284	11	18477534	LDHAL6A	4.73205e-08	2.08552e-08	-0.0567056	-0.0834363	0.0327997	0.0592873	0.7858	0.5
cg10593400	1	86044176	DDAH1	4.852e-08	1.37568e-09	-0.03625	-0.0465882	0.0351104	0.0608755	0.593935	0.683077
cg14636804	2	636937	TMEM18	4.859e-08	<1.0E-50	-0.0652178	-0.0530483	0.0892009	0.0573237	0.685213	0.518556
cg00989365	14	70014548	PLEKHD1	4.86591e-08	7.54952e-15	-0.0373227	-0.0406654	0.0532403	0.0575562	0.593498	0.451788
cg01111041	6	32121055	LOC100507547	4.86786e-08	5.09643e-10	-0.0225295	-0.0279673	0.0337951	0.0539552	0.370013	0.499448
cg11342453	6	26196699	HIST1H3D	4.89229e-08	<1.0E-50	0.0610201	0.0558299	0.0723183	0.0550648	0.711348	0.711519
cg06318402	1	244894363	DESI2	4.93565e-08	1.73016e-10	-0.0237482	-0.0287273	0.036926	0.0513631	0.400354	0.504155
cg21024112	6	41376993	NCR2	4.99586e-08	5.15691e-09	-0.0160123	-0.0208442	0.0308193	0.0500089	0.468113	0.738512
cg22376262	7	148959887	ZNF783	5.00525e-08	1.48645e-08	-0.0224497	-0.0293148	0.0290532	0.0499757	0.378941	0.502114
cg01652244	6	74063982	DPPA5	5.06555e-08	<1.0E-50	-0.127532	-0.108031	0.0939322	0.0570047	0.737446	0.596
cg20271330	1	204338515	LINC00628	5.11432e-08	1.08936e-07	-0.0104672	-0.0154135	0.0246905	0.0522591	0.351101	0.267273
cg13903421	2	219738714	WNT6	5.14588e-08	4.96691e-08	-0.0285552	-0.047226	0.0286508	0.0599663	0.791363	0.781282
cg04784212	16	31228427	TRIM72	5.22455e-08	1.0969e-13	-0.0179024	-0.018381	0.0471024	0.0541267	0.338854	0.27218
cg08570243	2	110969853	LINC00116	5.25833e-08	<1.0E-50	-0.108437	-0.102217	0.0727408	0.0613849	0.763322	0.710526
cg22878489	6	33245701	B3GALT4	5.48721e-08	1.42605e-10	-0.0274291	-0.038118	0.0398739	0.0594932	0.600379	0.67884
cg13184886	1	27153565	ZDHHC18	5.51943e-08	1.9873e-13	-0.0194708	-0.0202727	0.0402026	0.0419675	0.0847939	0.136691
cg23635560	2	27473369	SLC30A3	5.61954e-08	3.82072e-10	-0.0149117	-0.0176968	0.0360459	0.0530863	0.437602	0.429477
cg22079902	5	23507644	PRDM9	5.77719e-08	<1.0E-50	-0.0771015	-0.0684619	0.0875897	0.0582881	0.757364	0.591133
cg20020844	17	45929963	SP6	5.79412e-08	2.42062e-11	-0.0481945	-0.0603904	0.0443612	0.0566972	0.74397	0.379239
cg15610667	17	7287271	TNK1	5.8426e-08	1.29545e-09	-0.0247249	-0.036448	0.0372281	0.0545825	0.613846	0.274848
cg22889142	19	58862398	A1BG	5.85851e-08	6.43643e-11	-0.0313791	-0.033907	0.0408183	0.0582175	0.634026	0.678937
cg05141159	16	11036456	DEXI	5.91397e-08	1.31722e-07	-0.00804989	-0.010096	0.018315	0.0428963	0.0425879	0.0494949
cg09075844	5	1245902	SLC6A18	5.9383e-08	2.5568e-08	0.0315041	0.0468738	0.0324296	0.0549471	0.781015	0.413968
cg02055264	6	27210913	PRSS16	5.95933e-08	<1.0E-50	-0.0743783	-0.0545343	0.102144	0.054723	0.580917	0.241414
cg25453677	17	1835735	RTN4RL1	5.97816e-08	1.17684e-14	-0.0615539	-0.0628268	0.0574899	0.0591431	0.638021	0.650794
cg09143801	1	151105049	SEMA6C	6.03415e-08	1.20692e-08	-0.0683538	-0.0941611	0.0319088	0.0515577	0.693014	0.674308
cg01440864	17	44892087	WNT3	6.11685e-08	1.34125e-09	-0.0237542	-0.0337316	0.0352581	0.0533116	0.705336	0.658411
cg11334406	17	4546450	ALOX15	6.16905e-08	1.10248e-07	-0.0167924	-0.0266759	0.0245187	0.0512433	0.386267	0.316364
cg15039797	7	139320346	HIPK2	6.24587e-08	7.89147e-13	0.0685662	0.0729844	0.0473845	0.0507203	0.474904	0.442
cg14372753	22	18064176	SLC25A18	6.30295e-08	8.04807e-09	-0.0757262	-0.107322	0.0300113	0.0584016	0.687888	0.532533
cg03070187	19	6739184	TRIP10	6.33085e-08	<1.0E-50	-0.0196789	-0.0226609	0.0655492	0.053622	0.660173	0.478903
cg19981796	19	7928066	EVI5L	6.40947e-08	1.0393e-10	-0.0191635	-0.0237142	0.0364184	0.0547002	0.45025	0.566392
cg15695045	1	204330069	PLEKHA6	6.46255e-08	9.21171e-09	-0.0240793	-0.0340081	0.0303579	0.0477854	0.267018	0.301663
cg08290850	6	44238228	TMEM151B	6.48411e-08	1.84674e-12	-0.0233911	-0.0226235	0.0404745	0.047391	0.303396	0.140933
cg25274157	19	19626576	NDUFA13	6.57327e-08	<1.0E-50	-0.0355296	-0.0350204	0.0693296	0.0618394	0.61414	0.334343
cg05655707	11	18477254	LDHAL6A	6.58617e-08	2.71736e-11	-0.0545655	-0.0680971	0.0443214	0.0566373	0.696811	0.519757
cg26652413	19	17007057	CPAMD8	6.63065e-08	5.29858e-09	-0.0204616	-0.0288745	0.0373246	0.0606459	0.607739	0.763982
cg19506025	7	2671548	TTYH3	6.65852e-08	4.69895e-11	-0.0228888	-0.028756	0.0299739	0.0468839	0.0527766	0.296748
cg07381283	1	2391837	PLCH2	6.68445e-08	8.44236e-12	0.0165322	0.0208295	0.0422073	0.0538943	0.602126	0.478587
cg25930673	12	123319894	HIP1R	6.68693e-08	1.9984e-15	-0.0357109	-0.0357212	0.0482131	0.0448818	0.124105	0.242116
cg26743860	16	9260385	C16orf72	6.74735e-08	8.88423e-12	-0.0174542	-0.0205695	0.0329961	0.0415501	0.0113157	0.113636
cg09332353	6	27215376	PRSS16	6.77107e-08	4.88832e-09	-0.0213251	-0.0274461	0.0316275	0.0490472	0.479697	0.358531
cg02085507	19	6739192	TRIP10	6.87072e-08	2.22045e-16	-0.0516849	-0.0527285	0.0641926	0.0547737	0.694189	0.477596
cg01595366	14	103605032	TNFAIP2	6.87501e-08	2.7956e-09	-0.0222476	-0.0277719	0.0327641	0.0540815	0.497989	0.757829
cg03227037	20	62212228	HELZ2	6.91928e-08	7.22465e-08	-0.0197034	-0.028336	0.0233276	0.0473212	0.308493	0.571118
cg12049992	18	11147785	PIEZO2	6.99144e-08	1.07821e-07	-0.0340541	-0.0517575	0.0273311	0.059521	0.696974	0.522388
cg26674546	17	75282872	2009-09-01	7.16174e-08	1.20847e-07	-0.0145418	-0.0198223	0.0265437	0.0522937	0.44524	0.582895
cg21842274	5	76248637	CRHBP	7.20363e-08	1.55931e-11	-0.0232883	-0.026873	0.0327863	0.0497043	0.190462	0.259366
cg03928032	17	79244651	SLC38A10	7.22559e-08	1.79659e-09	0.0121788	0.0138054	0.0258611	0.0428091	0.0633151	0.206533
cg27143204	5	54530375	CCNO	7.22922e-08	2.05642e-09	-0.0218173	-0.0294142	0.034087	0.0529881	0.5278	0.588729
cg19844653	5	133451294	TCF7	7.27074e-08	1.01474e-13	-0.0317457	-0.0355301	0.0475199	0.0528286	0.502051	0.447778
cg06471905	17	42835688	ADAM11	7.29866e-08	2.90996e-11	-0.0129621	-0.0148992	0.0344097	0.0522443	0.373298	0.588652
cg06484100	17	41799087	SOST	7.41823e-08	1.36529e-07	-0.0139778	-0.0196382	0.0226412	0.0516115	0.228606	0.157459
cg26460678	3	50360667	HYAL2	7.4258e-08	4.52993e-12	-0.0171114	-0.0205337	0.0428701	0.0530777	0.460463	0.244444
cg19001789	13	111464554	LINC00346	7.52618e-08	2.66454e-15	-0.0536028	-0.0579039	0.0613727	0.0564995	0.764407	0.421638
cg25923214	17	74864205	MGAT5B	7.61357e-08	1.37378e-09	-0.0319749	-0.0345104	0.0273727	0.056291	0.190189	0.344237
cg02156380	1	180882591	KIAA1614	7.64171e-08	6.66134e-16	-0.024054	-0.0232985	0.0551384	0.0528989	0.397215	0.570724
cg02286533	17	41278179	NBR2	7.68195e-08	7.88233e-09	-0.0436163	-0.0571751	0.0347769	0.0596459	0.745773	0.450351
cg03551401	8	132051228	ADCY8	7.69417e-08	5.10703e-14	-0.0508067	-0.0581957	0.0542762	0.0520351	0.670885	0.325178
cg24130561	14	95621734	DICER1	7.71852e-08	8.47645e-08	0.0201136	0.0261403	0.0244764	0.0441377	0.220883	0.246835
cg02144258	2	220391374	ASIC4	7.73683e-08	6.86118e-14	-0.0189854	-0.0219896	0.0530993	0.0529455	0.574866	0.68847
cg22762992	2	118616377	DDX18	7.84324e-08	4.305e-11	-0.0581495	-0.0674551	0.0405004	0.0605741	0.816075	0.473306
cg07457944	18	67957061	SOCS6	7.93604e-08	<1.0E-50	-0.0230076	-0.0192228	0.0731729	0.0535668	0.274043	0.241648
cg13218710	5	132158887	SHROOM1	7.96299e-08	9.3164e-09	-0.0226135	-0.0306817	0.0290611	0.0524232	0.394237	0.48329
cg09982224	11	67775972	ALDH3B1	8.03261e-08	2.77645e-12	-0.0153711	-0.0179013	0.0433513	0.0558394	0.485835	0.530579
cg18923051	1	156053080	MEX3A	8.06834e-08	<1.0E-50	-0.0151857	-0.0150273	0.0567911	0.0573667	0.385473	0.388686
cg26218577	15	69744466	RPLP1	8.08012e-08	1.56253e-12	-0.0481161	-0.0595956	0.0489954	0.0562374	0.753276	0.536017
cg04685865	19	17712768	UNC13A	8.08938e-08	4.31005e-10	-0.0312627	-0.0388775	0.0373378	0.0582705	0.755912	0.552738
cg26366091	1	111770274	CHI3L2	8.22864e-08	6.57306e-08	-0.0247136	-0.0362489	0.022672	0.0468018	0.159699	0.317881
cg01020987	1	3816166	C1orf174	8.31063e-08	3.80348e-08	-0.0192237	-0.0266574	0.0296047	0.0561516	0.495148	0.62877
cg17328665	1	7887199	PER3	8.42964e-08	5.32907e-15	-0.0634435	-0.0672443	0.0575904	0.0546828	0.684916	0.573721
cg04468198	16	85784951	C16orf74	8.5955e-08	1.23965e-09	-0.0225905	-0.0305014	0.0352279	0.0530348	0.455431	0.510899
cg17868694	7	100841533	MOGAT3	8.61596e-08	8.52429e-13	-0.0478225	-0.0534265	0.0540879	0.0487495	0.757571	0.373
cg10589385	1	150898437	SETDB1	8.6218e-08	9.631e-10	-0.044578	-0.057109	0.0366691	0.0545937	0.707384	0.780079
cg10716823	15	69744850	RPLP1	8.86807e-08	5.10703e-15	-0.053403	-0.054221	0.0546462	0.0531785	0.599614	0.531483
cg18912103	4	2944692	NOP14-AS1	8.95672e-08	8.03028e-10	-0.0146379	-0.0207553	0.031936	0.0524546	0.416572	0.265845
cg25550468	7	112262557	LSMEM1	9.02191e-08	1.00364e-13	-0.0506464	-0.0493756	0.0540712	0.0588054	0.674777	0.70922
cg11007120	13	95366456	SOX21	9.10918e-08	4.44089e-16	-0.0459907	-0.0510098	0.0612284	0.0562418	0.713453	0.160081
cg17037355	20	3218545	SLC4A11	9.14975e-08	8.42704e-12	-0.0246208	-0.0308258	0.0457639	0.0516014	0.705032	0.702106
cg26545918	15	68124484	SKOR1	9.19304e-08	6.86128e-10	-0.018901	-0.0252172	0.0341865	0.0582873	0.619835	0.559236
cg13379408	18	11909052	MPPE1	9.20417e-08	<1.0E-50	-0.0231547	-0.0188707	0.0560126	0.041659	0.0652604	0.420202
cg12099459	1	147826902	MIR5087	9.37861e-08	2.7896e-09	-0.0419662	-0.0550667	0.0366047	0.0545055	0.680346	0.770961
cg22147143	3	46887973	MYL3	9.48113e-08	6.90187e-09	-0.0137552	-0.0169796	0.0247045	0.0485862	0.144502	0.210095
cg06429214	5	110062417	TMEM232	9.5206e-08	3.25961e-13	-0.0755451	-0.0882485	0.0508726	0.0550822	0.746481	0.431211
cg20951444	1	33337112	FNDC5	9.58919e-08	8.34188e-10	-0.0176623	-0.0225414	0.0353733	0.0516468	0.500337	0.465253
cg20327845	10	3138418	PFKP	9.61939e-08	7.34968e-14	-0.0352842	-0.0370057	0.0483206	0.0514113	0.420516	0.740741
cg24082680	1	63249199	ATG4C	9.67816e-08	1.07716e-07	-0.0475861	-0.071174	0.0289176	0.053589	0.699974	0.628131
cg03873281	5	131608955	PDLIM4	9.68447e-08	1.91298e-11	-0.0362079	-0.0476238	0.0430274	0.056209	0.54006	0.583845
cg05674437	3	196694153	PIGZ	9.73812e-08	4.44089e-15	-0.0819017	-0.0880139	0.0549295	0.053522	0.708313	0.661433
cg10397322	3	23244051	UBE2E2	9.85016e-08	2.17937e-11	-0.0281399	-0.0330619	0.0350544	0.0484585	0.270386	0.551622
cg06596054	12	57998581	DTX3	9.85104e-08	5.09275e-11	-0.0201199	-0.0219113	0.0324313	0.0453676	0.129336	0.110092
cg07225641	3	46618325	TDGF1	9.9929e-08	4.00053e-11	-0.0293096	-0.032374	0.0387281	0.0487832	0.509301	0.713969
cg18023674	1	2424003	PLCH2	1.00506e-07	2.15339e-12	0.0259821	0.031828	0.0466035	0.0585904	0.667872	0.481013
cg07581811	3	184491461	VPS8	1.02849e-07	8.9555e-09	-0.0581376	-0.0807713	0.0268344	0.0523276	0.381503	0.448347
cg11666770	19	42430910	ARHGEF1	1.03269e-07	2.86169e-08	-0.0525725	-0.0725923	0.0306074	0.0557155	0.789863	0.896755
cg15361590	5	140864701	PCDHGA1	1.03704e-07	1.00109e-11	0.0325845	0.0388331	0.0424965	0.0518266	0.57266	0.385291
cg17121140	13	111719003	ARHGEF7	1.03881e-07	3.92284e-08	-0.0408302	-0.058805	0.0286437	0.0559266	0.665379	0.599
cg23065715	2	220299659	SPEG	1.04052e-07	5.55112e-15	-0.0216811	-0.0228095	0.0518076	0.0519705	0.427599	0.563791
cg24581226	5	8457970	LOC100505738	1.04104e-07	9.4591e-14	-0.0601344	-0.058393	0.0540073	0.0508008	0.615312	0.593407
cg26364091	22	41633219	CHADL	1.04367e-07	5.09e-11	-0.0145737	-0.0174558	0.0398049	0.0464482	0.458105	0.180985
cg08801479	6	32165200	NOTCH4	1.08046e-07	1.56244e-07	-0.045453	-0.0631117	0.0253785	0.0554393	0.722076	0.523216
cg07101781	11	128337228	ETS1	1.08529e-07	4.80778e-11	0.0200858	0.0226025	0.0366224	0.0504967	0.387666	0.240223
cg09443102	21	46824976	COL18A1	1.0936e-07	1.36538e-08	-0.0155862	-0.0188932	0.0240525	0.0452339	0.242772	0.141529
cg24519157	20	54987662	CASS4	1.10358e-07	<1.0E-50	-0.0248499	-0.0252175	0.064694	0.0564505	0.450175	0.721547
cg01667892	5	23507656	PRDM9	1.13084e-07	<1.0E-50	-0.0843369	-0.0719225	0.0898291	0.0560987	0.775181	0.631476
cg00275479	5	134882430	NEUROG1	1.13311e-07	1.7395e-12	-0.0404035	-0.0476906	0.0458181	0.0567472	0.728433	0.65587
cg01468220	16	779026	HAGHL	1.15467e-07	5.00602e-09	-0.0248012	-0.0340671	0.0346402	0.0509445	0.650454	0.641221
cg18888461	11	18477379	LDHAL6A	1.16438e-07	1.4938e-08	-0.0436788	-0.0623633	0.0331168	0.0560238	0.710596	0.590679
cg19345662	19	48697722	CARD8	1.1654e-07	2.18906e-10	-0.0290896	-0.0334453	0.039607	0.0488907	0.652148	0.793666
cg01763666	17	80159506	CCDC57	1.195e-07	7.51739e-10	0.0300434	0.0336266	0.0303102	0.0512001	0.324844	0.570461
cg02763617	5	64331196	CWC27	1.19935e-07	2.4705e-09	-0.0226848	-0.0291368	0.0320048	0.0458293	0.28905	0.538991
cg20068058	11	46317859	CREB3L1	1.2116e-07	<1.0E-50	-0.0423932	-0.0414445	0.0708361	0.0527386	0.720279	0.42015
cg00448560	16	49525727	ZNF423	1.21836e-07	2.57467e-09	-0.0191987	-0.0257258	0.031546	0.0516597	0.434653	0.0927152
cg24345184	22	19751899	TBX1	1.23294e-07	1.39208e-10	-0.0232587	-0.0294844	0.0365257	0.0488879	0.622283	0.777336
cg26332114	19	57742260	AURKC	1.25522e-07	6.97857e-11	-0.056613	-0.0671274	0.0421292	0.0551319	0.687481	0.484221
cg09065876	17	45949756	SP6	1.26815e-07	<1.0E-50	-0.0587043	-0.0494065	0.0803505	0.0583369	0.594231	0.732063
cg16971128	22	37499859	TMPRSS6	1.26931e-07	1.58777e-11	-0.033065	-0.0342503	0.041615	0.0498448	0.449373	0.26847
cg08424749	6	32117292	PRRT1	1.29677e-07	2.60737e-10	-0.0276483	-0.0340694	0.0322687	0.050729	0.399447	0.469303
cg04983977	1	200842145	GPR25	1.35318e-07	<1.0E-50	-0.0288599	-0.02689	0.0642029	0.0508735	0.380223	0.432494
cg02214595	16	67143798	C16orf70	1.37676e-07	3.99297e-10	-0.0170566	-0.0206361	0.0285152	0.0371878	0.0298277	0.0655903
cg17115250	6	28557291	SCAND3	1.39558e-07	3.31735e-13	0.0434057	0.0404504	0.0419434	0.0525844	0.284022	0.543984
cg12440062	6	49681391	CRISP2	1.40651e-07	1.35227e-11	-0.062067	-0.0726365	0.0469315	0.0515166	0.686914	0.633703
cg14920044	10	91296311	SLC16A12	1.42293e-07	6.66134e-16	-0.0614697	-0.0521075	0.0568912	0.0466158	0.396247	0.380513
cg02273647	14	45722745	MIS18BP1	1.43821e-07	1.69642e-12	-0.043207	-0.0475347	0.0486052	0.0519851	0.691816	0.529412
cg23955417	1	26880928	RPS6KA1	1.43857e-07	2.47624e-12	-0.0300672	-0.0290271	0.0439205	0.0537254	0.475968	0.183673
cg06264679	6	32121433	LOC100507547	1.45239e-07	1.31228e-13	-0.0231696	-0.0247395	0.0486426	0.0537149	0.491278	0.618457
cg00243574	12	54410727	HOXC4	1.48565e-07	3.21054e-12	0.0339148	0.0411715	0.0420631	0.0479264	0.454933	0.0437436
cg09947186	11	66045506	CNIH2;RAB1B	1.48652e-07	7.95493e-11	-0.0179658	-0.0202836	0.0282275	0.0411887	0.0666823	0.314721
cg26827966	5	172189374	DUSP1	1.50903e-07	4.69964e-08	-0.0371079	-0.049256	0.0269938	0.0486169	0.446467	0.244489
cg08639948	1	36591237	TRAPPC3	1.50959e-07	6.66134e-16	-0.0301976	-0.0303268	0.0606296	0.0511925	0.676674	0.350325
cg14478475	9	37905113	SLC25A51	1.54915e-07	1.6728e-11	-0.0433515	-0.0488455	0.0440255	0.0553961	0.591527	0.469231
cg01847344	21	45929576	TSPEAR	1.55544e-07	1.41256e-09	-0.0171044	-0.022821	0.0335661	0.05262	0.53028	0.465091
cg18921954	5	33938909	RXFP3	1.61116e-07	2.12816e-11	-0.0465556	-0.0598753	0.0462332	0.0562452	0.74716	0.410387
cg08331981	19	19626599	NDUFA13	1.61226e-07	2.42029e-14	-0.0309649	-0.0344138	0.0569048	0.0552775	0.657564	0.211777
cg13150925	12	124529439	ZNF664-FAM101A	1.62256e-07	4.58039e-08	0.0215739	0.0303374	0.0270411	0.0438484	0.443061	0.65684
cg04555966	7	44185986	GCK	1.6236e-07	9.12428e-10	-0.0330492	-0.0394059	0.034048	0.0523137	0.535722	0.677019
cg23166988	16	2070861	NPW	1.63057e-07	6.26081e-09	-0.0207278	-0.0280767	0.0323315	0.0482383	0.60584	0.483207
cg06947430	19	51228937	CLEC11A	1.64319e-07	2.47459e-10	0.0228189	0.0281809	0.0377209	0.0472376	0.548851	0.741176
cg19704288	4	1582181	FAM53A	1.64934e-07	1.0446e-08	0.109465	0.151182	0.0297287	0.05319	0.613126	0.385875
cg06717221	19	1790921	ATP8B3	1.67002e-07	1.2963e-12	0.0434326	0.0499606	0.0481488	0.0536825	0.782242	0.382294
cg05037389	1	150230233	CA14	1.6787e-07	2.18082e-09	-0.0231801	-0.0327133	0.033888	0.0519147	0.604929	0.552686
cg26963632	16	85558148	GSE1	1.69237e-07	2.69105e-08	-0.0195512	-0.0263747	0.0293668	0.053826	0.454795	0.267003
cg16609957	5	132161867	SHROOM1	1.69919e-07	7.9376e-10	-0.0193553	-0.0256363	0.0368494	0.0567015	0.509369	0.388889
cg03984347	1	45190262	C1orf228	1.74308e-07	3.26406e-14	0.0428652	0.0412925	0.0498789	0.0516773	0.417684	0.420635
cg22017639	8	28243377	ZNF395	1.75387e-07	4.14615e-11	-0.0196849	-0.0234195	0.0377539	0.0523852	0.536427	0.764368
cg08187246	1	160054219	KCNJ9	1.75737e-07	1.0357e-10	-0.0255862	-0.0319383	0.0347376	0.0485042	0.483753	0.190329
cg02612650	6	26195910	HIST1H3D	1.76599e-07	2.00329e-11	0.0713675	0.0845287	0.0422926	0.051099	0.809667	0.691774
cg09038267	10	104524861	WBP1L	1.77071e-07	9.99213e-08	0.0194181	0.0234751	0.0220965	0.0386007	0.0685841	0.249221
cg13772414	2	222383060	EPHA4	1.80485e-07	7.77571e-08	0.016366	0.0241995	0.0247516	0.0482215	0.324202	0.548466
cg13713218	9	100000033	LOC100499484	1.81678e-07	1.21725e-12	-0.0693931	-0.0838571	0.04983	0.0544929	0.760158	0.707887
cg03021802	8	21923841	EPB49	1.84226e-07	1.42909e-10	-0.0223992	-0.0275437	0.03552	0.0518862	0.394353	0.479663
cg02114954	5	176243013	UNC5A	1.85445e-07	7.32747e-15	-0.0230199	-0.0225188	0.0549808	0.0497326	0.531816	0.357764
cg05490924	2	74730755	LBX2-AS1	1.87446e-07	5.84244e-12	-0.0258608	-0.0313972	0.0399695	0.0506934	0.400309	0.523926
cg16672637	17	74138356	RNF157-AS1	1.88337e-07	3.85997e-09	-0.0130149	-0.0148968	0.0267706	0.0451272	0.264725	0.27896
cg04330631	6	42018203	TAF8	1.90394e-07	<1.0E-50	-0.022928	-0.0190431	0.0550004	0.0408373	0.215081	0.453347
cg17129388	17	47571986	NGFR	1.91227e-07	2.14891e-08	-0.01595	-0.0230805	0.0285633	0.0444559	0.307969	0.274256
cg11707067	19	59073430	MZF1	1.91668e-07	1.6982e-11	-0.0647347	-0.0792891	0.0466586	0.0507746	0.612337	0.358087
cg07485685	6	35696061	LOC285847	1.92714e-07	9.987e-10	-0.0328816	-0.0337207	0.0269192	0.0395504	0.017663	0
cg23855319	4	2062392	NAT8L	1.93287e-07	<1.0E-50	-0.0516655	-0.0428247	0.0854153	0.0532801	0.740926	0.836435
cg10992686	10	104437694	ARL3	1.93722e-07	1.58096e-07	-0.00961616	-0.0129574	0.0201011	0.0356058	0.107351	0.173554
cg03923438	16	56672722	MT1A	1.95788e-07	3.53653e-08	-0.0187248	-0.0277598	0.0258553	0.0466335	0.369514	0.496418
cg15031685	7	128494060	FLNC	1.99549e-07	8.88178e-16	-0.0164561	-0.0163671	0.0556793	0.0486615	0.356737	0.627851
cg05574272	5	33938213	RXFP3	1.99752e-07	7.40519e-13	-0.042635	-0.0481573	0.0495092	0.0509682	0.652452	0.416162
cg27093273	18	5892213	TMEM200C	2.00376e-07	1.62953e-10	-0.0415573	-0.050384	0.0416658	0.0558977	0.775335	0.672084
cg26525025	12	52521183	KRT80	2.01761e-07	6.12112e-08	-0.0115579	-0.0137174	0.0251757	0.0466038	0.315714	0.293987
cg05867134	16	31009035	STX1B	2.0229e-07	9.12172e-08	-0.0123476	-0.0185795	0.0283867	0.0515012	0.590215	0.570379
cg15680518	12	132414800	PUS1	2.02966e-07	1.22793e-08	0.0113987	0.0162529	0.0232742	0.0433915	0.163859	0.220725
cg09349343	6	33245717	B3GALT4	2.04203e-07	2.78185e-09	-0.0113786	-0.0156155	0.033639	0.052153	0.50887	0.593891
cg09826056	1	78511360	GIPC2	2.05058e-07	4.44089e-16	-0.0332341	-0.035786	0.0602287	0.0555801	0.617105	0.519251
cg18294646	5	33937876	RXFP3	2.06844e-07	2.66454e-15	-0.0515008	-0.050482	0.0620901	0.0494309	0.720225	0.271271
cg07522372	18	13390440	LDLRAD4	2.08599e-07	2.36855e-12	0.022291	0.0210485	0.0370192	0.0445378	0.205942	0.0735931
cg06745753	1	45190297	C1orf228	2.1209e-07	1.42775e-13	0.0576334	0.0547791	0.0440661	0.0480784	0.290585	0.31432
cg01787285	1	2162682	SKI	2.12516e-07	3.35538e-11	-0.0303395	-0.0320955	0.0369924	0.0491251	0.353603	0.54023
cg14426688	7	43623067	STK17A	2.14086e-07	2.70323e-09	-0.0195383	-0.0237159	0.0250696	0.0388366	0.00964415	0
cg15305511	4	5712676	EVC	2.23647e-07	9.97673e-11	-0.0318941	-0.0403446	0.0422602	0.0529595	0.562264	0.439583
cg00346985	1	46940516	LOC729041	2.23877e-07	8.37747e-08	-0.0296001	-0.0451064	0.0280645	0.055488	0.72649	0.712151
cg01672129	14	103011800	MIR4309	2.26234e-07	6.79146e-12	-0.0186553	-0.0223465	0.0440848	0.0489081	0.506755	0.574844
cg16198103	8	53471884	FAM150A	2.26424e-07	3.38637e-08	-0.0321241	-0.044007	0.0272585	0.048425	0.44887	0.568254
cg07891179	7	29923883	WIPF3	2.30377e-07	9.77108e-10	-0.0274892	-0.0372944	0.0378032	0.0547076	0.725224	0.69936
cg20481312	15	59157579	FAM63B	2.31289e-07	1.41664e-13	-0.023734	-0.0289111	0.0495572	0.0496887	0.547683	0.430311
cg27211198	2	121776456	GLI2	2.32852e-07	6.98468e-09	-0.0269862	-0.0361965	0.0330016	0.0437424	0.766086	0.529231
cg14912575	14	70038236	CCDC177	2.33325e-07	<1.0E-50	-0.037722	-0.0334505	0.0764069	0.0553109	0.693627	0.405128
cg07142010	1	21901166	ALPL	2.33352e-07	4.36894e-10	-0.0286774	-0.0357158	0.0328255	0.0498371	0.444561	0.810251
cg00317680	8	97274070	MTERFD1	2.3412e-07	3.15792e-12	-0.0243851	-0.0232716	0.0361425	0.0365958	0.158294	0.601427
cg01486818	1	2409335	PLCH2	2.34955e-07	2.22045e-16	0.033882	0.0327718	0.0579429	0.0528417	0.695567	0.569709
cg09739413	6	32729498	HLA-DQB2	2.36993e-07	2.81353e-12	-0.0655813	-0.0716354	0.047351	0.0514723	0.664428	0.556107
cg26469387	15	31846670	OTUD7A	2.38306e-07	6.52851e-11	-0.0255302	-0.0322238	0.0427326	0.0524638	0.583308	0.601907
cg21184711	7	122488330	CADPS2	2.3841e-07	1.0735e-11	-0.035664	-0.0434447	0.0406535	0.0523071	0.57294	0.427996
cg00964751	17	36828900	C17orf96	2.47679e-07	2.67786e-13	-0.0249138	-0.0310104	0.0482826	0.0580064	0.61781	0.729047
cg14711690	1	226925082	ITPKB	2.48228e-07	4.59659e-11	-0.0153229	-0.0177888	0.0340331	0.0408563	0.123755	0.211009
cg02013274	2	28614438	FOSL2	2.50232e-07	1.84713e-09	-0.0126865	-0.0151558	0.0238462	0.0411222	0.0384579	0.00337079
cg07380026	5	1296007	TERT	2.52664e-07	2.51947e-08	-0.0203951	-0.0275563	0.0273721	0.0462121	0.473807	0.414201
cg08483723	3	45267960	TMEM158	2.53186e-07	<1.0E-50	-0.0310759	-0.0231483	0.0668149	0.0481001	0.26513	0.0523666
cg06219995	1	16374768	CLCNKB	2.55001e-07	1.77362e-10	-0.0147677	-0.0189012	0.0399172	0.0478141	0.633309	0.536354
cg15937641	1	117529619	PTGFRN	2.56895e-07	3.39585e-09	0.0194062	0.0230188	0.0275775	0.0472552	0.333611	0.178082
cg18753928	3	113234510	SPICE1	2.59307e-07	1.55431e-15	-0.0771072	-0.0765651	0.0635871	0.0509277	0.774063	0.80381
cg01135546	17	45949828	SP6	2.59683e-07	<1.0E-50	-0.0612853	-0.0520879	0.0792518	0.0522133	0.56306	0.78626
cg16998186	6	27205956	PRSS16	2.59751e-07	4.88177e-10	0.0247641	0.0344192	0.0376823	0.0483945	0.538688	0.303093
cg18204762	7	98741983	SMURF1	2.67058e-07	5.33271e-09	-0.020309	-0.028092	0.0229878	0.038625	0.0263418	0
cg02444433	5	23507469	PRDM9	2.68261e-07	<1.0E-50	-0.0817896	-0.0722073	0.0834949	0.0519736	0.809512	0.554563
cg02153814	3	194014525	LOC100131551	2.72779e-07	2.07136e-08	-0.0338588	-0.0492584	0.0310836	0.0523676	0.566441	0.585162
cg19148201	6	30860237	DDR1	2.73458e-07	1.73557e-10	-0.0242439	-0.0298332	0.0390627	0.0511275	0.543849	0.582345
cg01342115	3	134031663	AMOTL2	2.7959e-07	<1.0E-50	-0.0455756	-0.0474982	0.0632862	0.0479087	0.711389	0.77709
cg26530345	2	220312410	SPEG	2.79699e-07	2.51486e-10	-0.0248073	-0.0295969	0.0387484	0.0513353	0.555203	0.775
cg00025211	1	145588627	NUDT17	2.87067e-07	1.06109e-09	-0.0136922	-0.0171585	0.0353053	0.0479139	0.524167	0.462051
cg24790788	3	145879626	PLOD2	2.87197e-07	<1.0E-50	-0.0737872	-0.0590002	0.0911973	0.0535332	0.704911	0.506903
cg17103217	6	33245721	B3GALT4	2.88346e-07	3.65038e-10	-0.014218	-0.0189961	0.0379645	0.0502782	0.512862	0.617117
cg14223671	16	857981	PRR25	2.93909e-07	6.08561e-08	0.0534893	0.0736612	0.032141	0.0555636	0.77431	0.466135
cg14206172	19	39466757	FBXO17	2.94495e-07	6.66134e-16	-0.0506777	-0.0472259	0.0642354	0.0513473	0.638334	0.690125
cg08401628	16	85433676	MIR5093	3.06796e-07	2.86438e-13	0.0557918	0.0548272	0.0471758	0.0455045	0.340601	0.585949
cg05468843	11	117857990	IL10RA	3.10501e-07	5.22114e-08	-0.041284	-0.0519545	0.028868	0.0445065	0.354086	0.175676
cg11885357	3	138152902	ESYT3	3.1298e-07	<1.0E-50	-0.110861	-0.0923943	0.077697	0.0520885	0.78627	0.475573
cg27117491	2	39186743	LOC375196	3.13849e-07	2.35572e-10	-0.0299503	-0.0319217	0.0342947	0.0499817	0.401604	0.193548
cg01550828	3	196227453	RNF168	3.20861e-07	1.08379e-07	0.0275995	0.0386273	0.0253581	0.0503512	0.569217	0.742004
cg03291548	22	18266804	MICAL3	3.23635e-07	1.32154e-08	-0.0146241	-0.0206065	0.0254183	0.043224	0.194765	0.244755
cg08289350	17	74524371	CYGB	3.2437e-07	1.72249e-09	-0.0207122	-0.0267657	0.0326591	0.0450739	0.472779	0.62293
cg18026225	17	43198423	PLCD3	3.26872e-07	3.75419e-10	-0.0416414	-0.0538465	0.0357035	0.053315	0.700291	0.442932
cg04428700	7	27239556	HOXA13	3.2919e-07	<1.0E-50	-0.0220206	-0.0165464	0.0525769	0.0383591	0.0738748	0.45992
cg14989226	7	75897850	SRRM3	3.30731e-07	1.65886e-10	-0.0232523	-0.0264021	0.038237	0.0394749	0.367919	0.574246
cg10282491	16	3062368	CLDN9	3.3338e-07	3.55627e-11	-0.0275737	-0.0331795	0.0429624	0.048561	0.686744	0.722635
cg08655953	1	2425888	PLCH2	3.35277e-07	5.04812e-08	-0.0255272	-0.031599	0.0257371	0.0447318	0.279125	0.11745
cg02524475	4	145566595	HHIP-AS1	3.36627e-07	2.57572e-14	-0.0383236	-0.0364384	0.0557421	0.0476837	0.614045	0.858961
cg18063486	4	1512966	CRIPAK	3.44982e-07	<1.0E-50	0.0743202	0.065937	0.0708341	0.0469949	0.731561	0.526006
cg17329534	1	154980743	ZBTB7B	3.47145e-07	5.77374e-11	-0.0231977	-0.0256356	0.0387444	0.0526781	0.400067	0.280519
cg19234738	3	134031551	AMOTL2	3.47448e-07	6.72795e-14	-0.0315076	-0.0363132	0.0533937	0.0459332	0.750302	0.786611
cg19114050	15	52405026	BCL2L10	3.5089e-07	1.27426e-09	-0.0304215	-0.0368527	0.034311	0.0462341	0.643034	0.596421
cg01165297	16	475440	RAB11FIP3	3.52527e-07	4.84279e-13	-0.012581	-0.0115038	0.0340169	0.0404988	0.00682557	0.0471888
cg02656560	17	19967600	SPECC1	3.52774e-07	8.82041e-08	-0.0207084	-0.0284692	0.0264468	0.0488895	0.458073	0.367901
cg25293251	14	93260171	GOLGA5	3.59276e-07	1.46738e-11	-0.0291556	-0.0323956	0.0395159	0.0492006	0.526445	0.457002
cg23950233	6	33245739	B3GALT4	3.61017e-07	1.62085e-10	-0.0364715	-0.0465643	0.0393091	0.0507616	0.564902	0.688623
cg08330404	6	166419593	LINC00602	3.62093e-07	<1.0E-50	-0.0311338	-0.0234996	0.0807853	0.0482696	0.182972	0.147028
cg07779699	19	55873983	FAM71E2	3.6297e-07	7.52829e-08	-0.0152243	-0.0237265	0.0244577	0.0430185	0.268487	0.331243
cg24601559	2	43328536	ZFP36L2	3.67093e-07	2.02904e-09	-0.0297558	-0.0406224	0.0363583	0.0499806	0.732784	0.80437
cg11557618	2	172974138	DLX2	3.67666e-07	<1.0E-50	-0.0355713	-0.0320341	0.062742	0.0527278	0.594067	0.780488
cg17714703	19	4912221	UHRF1	3.70628e-07	1.29187e-09	0.031098	0.0415327	0.0323375	0.0444561	0.482502	0.48024
cg27009812	16	3062597	CLDN9	3.7389e-07	9.68512e-11	-0.0312828	-0.0394063	0.0429676	0.0502581	0.766322	0.772634
cg03434624	12	123380883	VPS37B	3.74071e-07	5.00649e-09	0.0504509	0.0622268	0.0303853	0.0500065	0.540382	0.525253
cg07949217	9	124497981	DAB2IP	3.76996e-07	1.03002e-11	-0.012797	-0.0148813	0.0425249	0.0451558	0.443817	0.460545
cg21291672	1	29451713	TMEM200B	3.79835e-07	2.78554e-08	-0.0183656	-0.02702	0.0289609	0.0467161	0.565196	0.599585
cg09365533	19	2429209	LMNB2	3.83568e-07	2.7294e-09	-0.0257268	-0.0314341	0.0308611	0.0463844	0.46147	0.48125
cg19095000	1	11711141	FBXO2	3.85005e-07	6.0967e-10	-0.0134724	-0.0153701	0.0356975	0.0411338	0.392281	0.136872
cg10794973	6	43692678	MRPS18A	3.86998e-07	1.24154e-11	-0.0201464	-0.0214468	0.0424942	0.046814	0.437918	0.390741
cg25953012	14	50052901	RPS29	3.88614e-07	3.59206e-10	-0.0225418	-0.0241259	0.0266979	0.0371802	0.0297375	0.153144
cg13734833	11	68779817	MRGPRF	3.90218e-07	4.57258e-08	-0.0244054	-0.0361375	0.0287192	0.04935	0.594176	0.43604
cg01226883	1	11865642	MTHFR	3.92425e-07	1.03618e-09	-0.0107552	-0.0120781	0.0247289	0.0389909	0.0144128	0
cg02663864	16	50776102	CYLD	4.02051e-07	1.78724e-12	-0.0179406	-0.0175866	0.0345476	0.0383113	0.0388053	0
cg00269553	8	52321814	PXDNL	4.05599e-07	<1.0E-50	-0.119712	-0.0943522	0.090448	0.0517603	0.689442	0.467205
cg10658516	2	98612531	TMEM131	4.05945e-07	1.2368e-09	0.0116978	0.0146075	0.0270096	0.0359158	0.0175117	0
cg18468844	1	28503720	PTAFR	4.06388e-07	1.10689e-12	-0.0322763	-0.034678	0.0424522	0.0534976	0.356484	0.379177
cg06180356	3	145879710	PLOD2	4.07974e-07	6.66134e-16	-0.0554802	-0.0522812	0.060245	0.0507342	0.513442	0.535861
cg24491553	15	41851210	TYRO3	4.08398e-07	6.09411e-09	-0.0126469	-0.0150095	0.0257134	0.0398693	0.12945	0.197342
cg04098052	7	24517414	MPP6	4.11639e-07	<1.0E-50	-0.043391	-0.0327158	0.0859999	0.0528747	0.537392	0.771605
cg10773601	19	51226046	CLEC11A	4.11798e-07	3.9968e-15	-0.0277547	-0.0284968	0.0544476	0.0492329	0.454328	0.640682
cg09203312	13	20805196	GJB6	4.12037e-07	9.14824e-14	-0.0395978	-0.0436131	0.050355	0.0512241	0.587941	0.753219
cg02359712	5	77280597	AP3B1	4.14073e-07	9.90946e-10	-0.0293235	-0.0378558	0.0365633	0.0464445	0.606517	0.727179
cg13561855	14	52735840	PTGDR	4.17309e-07	2.76695e-10	-0.0399642	-0.0490241	0.0372953	0.0515058	0.560103	0.247976
cg22361859	17	37123638	FBXO47	4.23665e-07	1.25918e-09	-0.0664256	-0.0849247	0.0357349	0.0535924	0.660091	0.370143
cg02958895	1	46999348	MKNK1-AS1	4.25404e-07	1.37459e-08	-0.0162756	-0.0249694	0.0308173	0.0478794	0.533864	0.26062
cg03027739	7	127805680	MIR129-1	4.29475e-07	1.78675e-10	-0.0270666	-0.0346217	0.0369919	0.0487477	0.702888	0.518109
cg19601035	12	48399140	COL2A1	4.31754e-07	1.37389e-07	-0.0182797	-0.0282455	0.0230882	0.0401084	0.396904	0.723819
cg00047843	12	83321412	TMTC2	4.47263e-07	1.11957e-10	0.0228659	0.0236122	0.0292079	0.0377918	0.0445401	0.174145
cg18407136	15	83681092	C15orf40	4.50804e-07	1.89444e-09	-0.0307921	-0.0420609	0.0337792	0.053069	0.68312	0.735356
cg07624705	19	19626525	NDUFA13	4.60955e-07	8.72429e-08	-0.0192599	-0.0282272	0.0289951	0.05128	0.642017	0.360572
cg16248798	1	247271246	C1orf229	4.69535e-07	1.59872e-14	-0.0316532	-0.0303869	0.0523131	0.0479852	0.494832	0.783654
cg16289618	6	29705939	HLA-F-AS1	4.70198e-07	1.46849e-07	-0.0198507	-0.0259861	0.0230025	0.0423143	0.2524	0.300562
cg09745688	16	2908918	PRSS22	4.76553e-07	5.95116e-10	0.0514008	0.0630728	0.0379581	0.0495797	0.822654	0.604839
cg04120272	17	37123843	FBXO47	4.7972e-07	5.48384e-12	-0.0562362	-0.0652745	0.0476598	0.0532586	0.716539	0.516736
cg12669395	6	30860866	DDR1	4.80399e-07	1.72251e-11	-0.0183679	-0.02199	0.0410354	0.0480319	0.525233	0.62073
cg21374048	17	56013560	CUEDC1	4.81746e-07	1.87736e-10	-0.0201508	-0.0217638	0.035206	0.0473951	0.438157	0.206215
cg04591709	8	102235927	ZNF706	4.82904e-07	1.57072e-08	-0.0181683	-0.0236368	0.0280553	0.0457727	0.37827	0.373178
cg20787146	11	75142449	KLHL35	4.90297e-07	7.77156e-14	-0.0268414	-0.0302023	0.0522704	0.0490371	0.686744	0.609562
cg25334934	2	121269348	LOC84931	4.93435e-07	8.51892e-09	-0.0507956	-0.0713623	0.0306723	0.0513955	0.654904	0.685279
cg18637459	12	108991991	TMEM119	5.1564e-07	9.24367e-11	-0.0251174	-0.0271978	0.0374275	0.0484835	0.351452	0.253401
cg17606683	11	86013447	C11orf73	5.17011e-07	<1.0E-50	-0.0409207	-0.0280231	0.0653925	0.0381795	0	0
cg08304608	20	57594200	TUBB1	5.20391e-07	9.35225e-11	-0.0181125	-0.0191507	0.0338007	0.0409229	0.253123	0.321091
cg21667367	2	172974217	DLX2	5.20559e-07	4.35652e-12	-0.0320557	-0.031835	0.0436923	0.0491213	0.625188	0.809935
cg09013220	17	45944385	SP6	5.21604e-07	1.11854e-07	-0.0538354	-0.0831457	0.0269074	0.0488429	0.44753	0.314286
cg22054885	5	23507450	PRDM9	5.27468e-07	<1.0E-50	-0.0797953	-0.0672211	0.0881201	0.049727	0.794312	0.521869
cg03371609	8	52322171	PXDNL	5.29776e-07	<1.0E-50	-0.0639472	-0.0534853	0.0697488	0.0479888	0.612315	0.351406
cg22109708	5	132148179	SOWAHA	5.32462e-07	2.22045e-14	-0.0408379	-0.038701	0.0530708	0.0484002	0.605968	0.383807
cg09243648	17	45944464	SP6	5.3325e-07	1.53413e-10	-0.0455659	-0.0479601	0.0358623	0.0429635	0.371663	0.328125
cg23006040	4	188528319	LOC339975	5.34933e-07	4.33713e-10	-0.0214189	-0.0249714	0.0336193	0.0450272	0.382793	0.444944
cg10867349	14	88793741	KCNK10	5.36591e-07	<1.0E-50	-0.0663001	-0.0535454	0.0730667	0.0446383	0.651539	0.331992
cg03233793	19	19626605	NDUFA13	5.37119e-07	1.08313e-12	-0.0331851	-0.0368339	0.0507111	0.0522371	0.696615	0.341889
cg14357089	10	18550033	CACNB2	5.38832e-07	1.3208e-09	-0.034665	-0.0436395	0.0349369	0.0471046	0.556866	0.662109
cg06940110	2	118616430	DDX18	5.42402e-07	<1.0E-50	-0.0644964	-0.0554259	0.0684114	0.0552271	0.817415	0.500514
cg10848724	12	123380878	VPS37B	5.46586e-07	9.2342e-10	0.0508201	0.0589285	0.0330159	0.0506062	0.561687	0.420886
cg09374627	14	97206170	VRK1	5.47345e-07	2.85454e-10	-0.0416825	-0.0503912	0.0394476	0.0482611	0.663044	0.725933
cg23241201	19	45580017	ZNF296	5.55031e-07	7.60349e-08	-0.0235501	-0.0294196	0.0245659	0.0382584	0.176097	0.290375
cg24170248	19	56015067	SSC5D	5.55072e-07	2.73337e-13	0.0315422	0.0353753	0.0502799	0.0508272	0.63135	0.339642
cg03140421	16	67200181	HSF4	5.61291e-07	3.42475e-10	-0.0216678	-0.0268593	0.0375803	0.0473983	0.66159	0.469526
cg19334350	7	157406737	PTPRN2	5.62749e-07	2.22045e-16	0.045943	0.0424926	0.0651608	0.0498104	0.67194	0.608258
cg09174870	16	56702802	MT1G	5.6695e-07	2.00062e-13	-0.0277624	-0.0288462	0.051759	0.0502666	0.572412	0.542261
cg03915638	3	62356042	FEZF2	5.83553e-07	1.46129e-09	-0.0224978	-0.0267174	0.0260349	0.0354088	0	0.0132248
cg01076129	6	49681334	CRISP2	5.84956e-07	4.44089e-16	-0.0748985	-0.0718125	0.0660984	0.0503281	0.751678	0.712181
cg05192452	5	71852759	ZNF366	5.85322e-07	6.06004e-11	-0.0603015	-0.0575353	0.0383081	0.0472277	0.571998	0.489318
cg10230427	6	57038227	BAG2	5.94097e-07	7.63826e-10	-0.0512543	-0.0681765	0.0344545	0.0472678	0.565407	0.530256
cg22196260	19	50936172	MYBPC2	5.96715e-07	3.13083e-13	-0.0298337	-0.0338583	0.0501051	0.0491921	0.673631	0.656281
cg14688272	17	80673958	FN3KRP	5.98534e-07	6.01285e-09	-0.0173034	-0.0233011	0.0315801	0.0488852	0.525233	0.626286
cg23044186	5	141228416	PCDH1	6.03314e-07	2.22045e-16	-0.0170967	-0.0149186	0.0549579	0.0483314	0.371971	0.459732
cg05086567	17	7486615	MPDU1	6.0619e-07	2.259e-08	-0.044059	-0.0541069	0.0303949	0.0444624	0.406619	0.453476
cg17818731	2	43295753	ZFP36L2	6.06263e-07	1.12512e-07	-0.0215807	-0.0302886	0.027357	0.0428493	0.569808	0.441476
cg24129626	17	41924499	CD300LG	6.12597e-07	3.34038e-08	-0.0184124	-0.0227031	0.0229581	0.042578	0.199756	0.319536
cg07875335	2	48844728	STON1-GTF2A1L	6.14885e-07	4.44938e-10	-0.0494163	-0.0607739	0.0345896	0.0466984	0.562815	0.502976
cg12250581	12	2045810	LOC100271702	6.21957e-07	1.12377e-12	-0.0342663	-0.0362898	0.0431487	0.0467083	0.456542	0.629032
cg16024530	11	128673534	FLI1	6.22858e-07	9.13936e-13	-0.0178244	-0.019207	0.0432907	0.0512192	0.440256	0.179856
cg19612068	6	33130024	COL11A2	6.37635e-07	9.95826e-11	-0.0111932	-0.0131901	0.0384613	0.0479739	0.49499	0.485388
cg10242160	4	48493350	ZAR1	6.37969e-07	1.74503e-11	-0.0221672	-0.0240948	0.0379911	0.0426796	0.372161	0.460212
cg08320164	19	18228740	MAST3	6.40344e-07	1.14873e-09	-0.0223036	-0.0224098	0.0296535	0.0342167	0.0978126	0.214213
cg04626491	6	28584053	SCAND3	6.43548e-07	1.77361e-09	-0.0257959	-0.0315438	0.0343272	0.048029	0.651572	0.67419
cg19396666	10	125866280	CHST15	6.53086e-07	3.44736e-10	-0.0221394	-0.0252941	0.0368221	0.0419981	0.582126	0.634886
cg21845390	13	40762260	LINC00332	6.55523e-07	1.18658e-11	0.0202623	0.0197387	0.0392018	0.0438726	0.358613	0.158602
cg09373148	3	138152837	ESYT3	6.56331e-07	<1.0E-50	-0.0543108	-0.0497185	0.075738	0.0495491	0.785876	0.588235
cg26952796	19	50860847	NAPSA	6.78142e-07	3.62179e-08	0.039388	0.057418	0.0302822	0.048386	0.753852	0.301108
cg20863339	3	71804005	GPR27	6.81766e-07	7.86704e-13	-0.0226945	-0.024691	0.047159	0.0465482	0.543378	0.663377
cg25243008	17	59554806	TBX4	6.85884e-07	1.86537e-10	-0.0315777	-0.039317	0.0383985	0.045591	0.682404	0.52
cg00498401	17	74024829	EVPL	6.88527e-07	<1.0E-50	-0.0245754	-0.0202677	0.0641917	0.0490625	0.396408	0.552066
cg11321083	11	64638190	EHD1	6.90266e-07	4.62839e-08	-0.0208422	-0.0266356	0.0257359	0.0451323	0.438723	0.165138
cg15244786	12	54446279	HOXC4	6.91095e-07	7.61613e-14	-0.0449312	-0.0453901	0.0524221	0.0565069	0.721994	0.697198
cg16449012	4	17781880	FAM184B	6.95759e-07	2.69583e-10	-0.0347397	-0.0412215	0.0393778	0.0477479	0.652762	0.676798
cg22637865	22	43486524	TTLL1	7.0211e-07	2.22045e-15	-0.0268525	-0.0236571	0.0498774	0.0474067	0.311834	0.591568
cg14235350	6	157802496	ZDHHC14	7.03137e-07	9.6833e-11	-0.0238169	-0.0287364	0.028989	0.0366655	0.0185218	0.191753
cg03697708	19	13617549	CACNA1A	7.05009e-07	5.09148e-13	-0.0444282	-0.0447169	0.0346487	0.0375189	0.0100335	0.179513
cg00220225	3	50194470	SEMA3F	7.05878e-07	6.85582e-09	-0.0256732	-0.0365056	0.0329727	0.0465737	0.746804	0.809051
cg22801949	1	181057279	IER5	7.12851e-07	9.29523e-12	-0.0262508	-0.0297832	0.0430428	0.0472853	0.467303	0.403053
cg17712928	7	2124974	MAD1L1	7.13017e-07	9.97959e-08	0.0239375	0.0281065	0.0246596	0.0354141	0.249875	0.416025
cg14444751	5	157117513	C5orf52	7.16455e-07	1.87184e-13	-0.0349128	-0.0365436	0.0521304	0.0444523	0.716209	0.563895
cg10096378	22	40391617	FAM83F	7.34131e-07	6.50213e-12	-0.0234039	-0.0251748	0.045662	0.0493885	0.589395	0.493488
cg17011590	19	15529901	AKAP8L	7.3824e-07	1.1724e-07	-0.0123254	-0.0164672	0.0182897	0.0399348	0	0
cg27158481	20	25128681	LOC284798	7.44448e-07	1.73417e-13	-0.0373341	-0.0382651	0.0537203	0.0468719	0.715784	0.213319
cg08142858	1	2718742	TTC34	7.44584e-07	<1.0E-50	0.0294381	0.0229216	0.0966749	0.0484237	0.524009	0.639311
cg24437523	1	160085568	ATP1A2	7.44895e-07	7.7835e-09	-0.0239586	-0.0331657	0.0333108	0.0466187	0.616829	0.646454
cg26107597	14	31343283	COCH	7.46619e-07	<1.0E-50	-0.0355847	-0.0282088	0.0622392	0.0437327	0.567455	0.373045
cg26787020	1	174968089	CACYBP	7.48227e-07	2.2576e-10	-0.0228433	-0.027922	0.0376339	0.0437477	0.466129	0.658798
cg02247068	15	41793472	ITPKA	7.48435e-07	1.13967e-07	-0.0133111	-0.019492	0.0260861	0.0476595	0.663883	0.503212
cg07355069	5	43289541	HMGCS1	7.58748e-07	4.09811e-08	0.0595609	0.0696706	0.0220927	0.0327295	0.0682797	0.0809674
cg25738529	12	49938018	KCNH3	7.66055e-07	1.82077e-14	-0.0156969	-0.0143195	0.0515675	0.0434708	0.511243	0.44806
cg22878388	2	105853796	GPR45	7.78507e-07	<1.0E-50	-0.0723265	-0.0568965	0.0775256	0.0476433	0.789893	0.742363
cg25851313	1	16400665	FAM131C	7.82041e-07	3.17133e-08	-0.0368461	-0.0485089	0.028322	0.0471626	0.557553	0.519412
cg07880854	2	112895559	FBLN7	7.9001e-07	4.3499e-11	-0.0318132	-0.0353526	0.0405194	0.0505357	0.670535	0.699301
cg16937168	2	241936844	SNED1	7.99062e-07	1.37668e-14	-0.0232519	-0.0208235	0.0497012	0.0394274	0.426879	0.368476
cg21167563	1	117114916	CD58	8.01324e-07	9.30078e-12	-0.0236713	-0.0245206	0.0351769	0.0416973	0.1613	0.27674
cg00622166	16	46919021	GPT2	8.07758e-07	1.28606e-11	-0.0179721	-0.0213784	0.0444798	0.0462055	0.494279	0.461194
cg04362002	5	23506738	PRDM9	8.13395e-07	1.87184e-13	-0.0305748	-0.0344551	0.04962	0.0479332	0.696075	0.497452
cg18305433	6	28972963	ZNF311	8.14299e-07	3.76136e-09	-0.0318043	-0.0398513	0.0309389	0.0464726	0.54384	0.16841
cg08698605	19	8273643	CERS4	8.17452e-07	2.73502e-08	-0.0203699	-0.0258218	0.0297537	0.0465855	0.629782	0.569647
cg11162888	13	40762188	LINC00332	8.19125e-07	1.70908e-12	0.0270533	0.024089	0.0432515	0.0439525	0.386745	0.0792079
cg02500042	4	77342788	SHROOM3	8.19745e-07	1.19904e-14	-0.0207264	-0.0232301	0.0534858	0.0432165	0.586559	0.480892
cg17775765	13	95354021	SOX21	8.29878e-07	4.03012e-09	-0.0193978	-0.0272395	0.0295001	0.0491887	0.539495	0.472367
cg01550445	11	72929983	P2RY2	8.31869e-07	2.06571e-07	-0.0154642	-0.0216883	0.0223617	0.0437531	0.205954	0.314917
cg16385865	12	132670412	GALNT9	8.35667e-07	3.10317e-08	0.0262689	0.0365703	0.0258569	0.0492245	0.435703	0.518519
cg10557828	3	145879642	PLOD2	8.38144e-07	2.88658e-15	-0.048868	-0.0447525	0.0583623	0.0494525	0.56334	0.56487
cg01115274	11	74022764	P4HA3	8.39389e-07	3.4177e-09	-0.0152537	-0.018105	0.022541	0.0332926	0	0.0881459
cg03089717	6	28557411	SCAND3	8.47904e-07	2.12805e-08	0.0294217	0.035821	0.0271781	0.0496444	0.299351	0.395469
cg24070990	1	228634724	HIST3H2A	8.48801e-07	1.7048e-10	-0.0368645	-0.0427463	0.040038	0.0441776	0.470894	0.600849
cg11132534	2	218114431	DIRC3	8.51733e-07	2.2737e-08	-0.0249965	-0.0325867	0.026987	0.0426272	0.423649	0.54324
cg13303654	10	31610754	ZEB1	8.68318e-07	6.76641e-08	0.0253212	0.0331668	0.0267232	0.0428283	0.524325	0.740273
cg25390787	6	49681299	CRISP2	8.82564e-07	1.13243e-14	-0.0908685	-0.0816242	0.0601762	0.0477417	0.755235	0.722222
cg05745223	2	74730630	LBX2-AS1	8.82918e-07	8.93581e-08	-0.0163367	-0.0225395	0.0247753	0.0441453	0.358048	0.407092
cg22631938	3	71802420	EIF4E3	8.87565e-07	<1.0E-50	-0.0367701	-0.0323878	0.0599746	0.0455975	0.4393	0.534183
cg05092353	13	113777013	F10	8.88469e-07	3.95195e-08	-0.0183083	-0.0280633	0.0289166	0.0474902	0.606562	0.504444
cg24566261	6	30854164	DDR1	8.9123e-07	2.69629e-12	-0.0309015	-0.0339128	0.049263	0.0472702	0.762597	0.805058
cg23737263	2	43328424	ZFP36L2	9.18968e-07	1.62456e-08	-0.0258786	-0.0355513	0.0311683	0.045031	0.647838	0.647124
cg20308817	19	51225848	CLEC11A	9.21945e-07	2.22045e-16	-0.0235714	-0.0248569	0.0603391	0.0499943	0.60192	0.613103
cg26207503	12	81110749	MYF5	9.21981e-07	6.83175e-08	-0.0203259	-0.0280716	0.0283797	0.0492235	0.673745	0.492886
cg26783727	16	67204807	NOL3	9.23371e-07	7.90035e-13	-0.0170683	-0.0177415	0.0460138	0.0504482	0.551308	0.357664
cg26456563	19	40728617	CNTD2	9.33256e-07	2.38527e-10	0.0634675	0.0647255	0.0353948	0.047818	0.575834	0.396603
cg11287888	14	103604700	TNFAIP2	9.40899e-07	3.39086e-09	-0.0215194	-0.0292976	0.0344714	0.0445135	0.611436	0.714595
cg15832662	11	63448437	RTN3	9.5266e-07	3.84389e-10	-0.0299858	-0.0332026	0.0341534	0.0443206	0.372896	0.325635
cg24676612	1	111148105	KCNA2	9.55942e-07	3.59014e-10	-0.0141524	-0.0151485	0.0324773	0.0406831	0.306783	0.228659
cg12300731	11	101207708	TRPC6	9.6534e-07	1.69842e-12	-0.0407349	-0.0448995	0.0500252	0.0540116	0.661784	0.212679
cg19837938	5	23507458	PRDM9	9.66895e-07	<1.0E-50	-0.0628014	-0.0514614	0.0834256	0.0457007	0.772907	0.501502
cg05045817	1	184633523	EDEM3	9.67656e-07	4.86278e-14	-0.0356747	-0.0349376	0.0546097	0.0480159	0.721038	0.686154
cg08011245	19	55975827	ISOC2	9.68101e-07	9.84046e-08	-0.0449616	-0.057827	0.0274606	0.0412329	0.640383	0.587318
cg08909156	1	36616028	TRAPPC3	9.68284e-07	7.38404e-10	-0.0140699	-0.0159522	0.0314167	0.0451469	0.381832	0.146552
cg16005592	5	964654	LOC100506688	9.73663e-07	9.8343e-09	0.0194287	0.0212332	0.0276811	0.0418101	0.316956	0.161491
cg04566512	22	46457588	LOC150381	9.76622e-07	9.6088e-11	-0.0640646	-0.0737747	0.0412328	0.0461889	0.759617	0.810363
cg23684449	16	46919194	GPT2	9.82561e-07	1.08701e-09	-0.0154193	-0.0184156	0.0359762	0.0470913	0.501136	0.364679
cg13380502	1	27718221	GPR3	9.99727e-07	1.55431e-15	-0.0301738	-0.0274525	0.0525981	0.0457845	0.413532	0.333333
cg00137234	4	155703138	RBM46	1.01373e-06	1.60909e-08	-0.0538465	-0.0686178	0.0278263	0.0432305	0.568291	0.510121
cg05490519	16	2908934	PRSS22	1.01516e-06	5.55322e-11	0.0405129	0.0503141	0.0427788	0.0475276	0.80863	0.626866
cg01612140	6	78166436	HTR1B	1.01625e-06	5.2589e-11	-0.0266862	-0.0316882	0.0372463	0.0453978	0.289163	0.413255
cg02802029	3	145879686	PLOD2	1.02481e-06	<1.0E-50	-0.0738683	-0.0565197	0.0870585	0.0501997	0.693771	0.523952
cg01905210	3	138154620	ESYT3	1.0336e-06	8.87554e-08	-0.0170725	-0.0236183	0.0257943	0.043846	0.52185	0.657248
cg00760935	4	155411351	DCHS2	1.0388e-06	2.1838e-08	-0.0223767	-0.0273042	0.0291905	0.0437892	0.559523	0.16999
cg07543967	19	49055443	SULT2B1	1.04294e-06	1.5284e-08	-0.0412485	-0.0558814	0.0300738	0.0451416	0.563889	0.358163
cg00233307	19	39109076	EIF3K	1.04927e-06	3.98148e-11	-0.0258547	-0.0292753	0.037493	0.0422484	0.432932	0.342583
cg06484000	19	46998383	PNMAL2	1.06019e-06	1.67888e-12	-0.0345759	-0.0384396	0.0472403	0.0465858	0.731314	0.834547
cg11014740	2	129079223	HS6ST1	1.06745e-06	1.64686e-10	-0.0121457	-0.0132078	0.0378378	0.0445467	0.470389	0.467532
cg19247726	1	228565914	OBSCN	1.06882e-06	4.64084e-11	-0.0197991	-0.0231603	0.0429491	0.0474937	0.703291	0.708602
cg05873568	14	105155145	INF2	1.08677e-06	1.03053e-09	-0.0194715	-0.0226466	0.0325746	0.0442853	0.351452	0.133721
cg05672327	9	139141754	QSOX2	1.08909e-06	5.88062e-08	-0.0143344	-0.0176095	0.0224489	0.0400507	0.109452	0.116424
cg10238080	12	50445058	ASIC1	1.09812e-06	<1.0E-50	-0.0321797	-0.0269694	0.0563274	0.0467612	0.30237	0.466912
cg03185704	7	150020125	ACTR3C	1.11256e-06	5.05295e-08	-0.0521468	-0.0720718	0.0317266	0.0482565	0.784109	0.39839
cg26466145	3	188665930	LPP	1.11762e-06	<1.0E-50	-0.033828	-0.0298947	0.0638423	0.0497046	0.421588	0.269294
cg21749424	6	166418799	LINC00602	1.12734e-06	2.61393e-10	-0.0486241	-0.0554496	0.0384139	0.0447858	0.692138	0.763083
cg06655187	17	34842929	ZNHIT3	1.13118e-06	2.52287e-12	-0.0137318	-0.0137173	0.0355943	0.035437	0.0331161	0
cg04631458	7	1329462	UNCX	1.1324e-06	8.85951e-08	-0.0252506	-0.0321988	0.0277483	0.0465439	0.593982	0.775293
cg09965419	6	30854186	DDR1	1.13327e-06	5.27426e-09	-0.0319635	-0.0422162	0.0344831	0.0466982	0.750395	0.823062
cg26345105	1	228634265	HIST3H2A	1.1392e-06	2.08542e-11	-0.0307938	-0.0327842	0.0431268	0.0479874	0.626017	0.658798
cg05358404	20	62288950	RTEL1	1.14526e-06	7.74549e-11	-0.0284977	-0.0335087	0.040975	0.045844	0.675519	0.849951
cg22986999	11	68781976	MRGPRF	1.15067e-06	8.49543e-13	-0.023744	-0.028317	0.0512227	0.0432898	0.702857	0.792763
cg10601026	10	64579140	EGR2	1.15266e-06	8.95728e-13	-0.0454306	-0.0479349	0.0514488	0.0478423	0.736251	0.14
cg08832227	12	5020693	KCNA1	1.16385e-06	9.27702e-13	-0.0423466	-0.0441905	0.0489499	0.0447329	0.595621	0.580259
cg03785076	2	241936915	SNED1	1.1754e-06	<1.0E-50	-0.0208165	-0.0172031	0.0599658	0.0443314	0.475906	0.754149
cg26217402	14	74238381	ELMSAN1	1.1754e-06	7.22575e-08	0.0184922	0.0207605	0.0246517	0.0455898	0.296893	0.217391
cg05721773	1	207083336	FAIM3	1.18249e-06	2.28877e-11	-0.012762	-0.0141728	0.0397151	0.0465451	0.404281	0.388582
cg21148531	6	106774172	ATG5	1.19098e-06	2.18928e-08	-0.0496114	-0.0656897	0.0303964	0.0472309	0.55068	0.406188
cg26838023	20	30072314	REM1	1.19374e-06	3.38873e-10	-0.0281928	-0.0340085	0.0350687	0.0458957	0.451317	0.291793
cg01165142	16	27367172	IL4R	1.20083e-06	1.37668e-14	-0.0214357	-0.0194085	0.0535992	0.0459404	0.421265	0.466752
cg25753010	13	32889434	BRCA2	1.2114e-06	3.10796e-12	-0.0432796	-0.0417302	0.044454	0.0447725	0.542791	0.303093
cg11367159	12	110044531	MVK	1.23714e-06	2.45182e-10	-0.0297709	-0.0380286	0.037652	0.0461161	0.759501	0.836472
cg09068286	5	179779115	GFPT2	1.25927e-06	3.19744e-14	-0.0346694	-0.0341956	0.0537861	0.047261	0.687322	0.695469
cg19691659	11	64482332	NRXN2	1.26994e-06	1.29299e-11	-0.0188729	-0.0219388	0.0358157	0.0434345	0.331068	0.488095
cg24213669	2	118616576	DDX18	1.27645e-06	3.39728e-14	-0.0519039	-0.0510712	0.056894	0.0506108	0.796139	0.550936
cg05977462	12	111475136	CUX2	1.27773e-06	2.51032e-08	-0.0402376	-0.0513579	0.0303295	0.044682	0.780516	0.501502
cg24059075	12	49688316	PRPH	1.28023e-06	2.95319e-14	-0.0179949	-0.0178946	0.047077	0.0432758	0.370143	0.464052
cg07059402	22	38244781	EIF3L	1.28344e-06	6.99776e-11	-0.0545423	-0.0543625	0.0472431	0.0485377	0.811338	0.688933
cg23973272	8	52322169	PXDNL	1.29421e-06	<1.0E-50	-0.130486	-0.0893355	0.0933599	0.0459089	0.653143	0.317907
cg20017761	20	25128807	LOC284798	1.29561e-06	2.22045e-16	-0.0329087	-0.0315303	0.0635277	0.0461541	0.673739	0.542169
cg22452837	6	28664155	SCAND3	1.30265e-06	3.16869e-09	-0.0585145	-0.0763426	0.0348103	0.046619	0.782168	0.53373
cg04239967	17	63534625	AXIN2	1.31087e-06	1.52706e-07	0.0161745	0.0190277	0.0210608	0.0362001	0.185666	0.504263
cg00673006	2	97483133	CNNM3	1.31536e-06	<1.0E-50	0.0204084	0.0190564	0.0632163	0.0367398	0.58566	0.461704
cg11434671	17	74524611	CYGB	1.32524e-06	3.85244e-10	-0.0213947	-0.0280805	0.0365201	0.0426122	0.527469	0.665485
cg05708536	1	113285118	FAM19A3	1.33386e-06	8.65974e-15	-0.0628211	-0.0639477	0.0583774	0.0451241	0.735222	0.597793
cg01806238	17	56597682	2004-09-01	1.33924e-06	6.88335e-10	-0.0204322	-0.0250002	0.0307116	0.0432503	0.313763	0.0915033
cg00462007	4	582634	PDE6B	1.38334e-06	2.32453e-09	0.0411415	0.0472738	0.0286269	0.0424633	0.382207	0.152305
cg26998717	12	81110893	MYF5	1.39552e-06	1.77636e-15	-0.0387724	-0.0354867	0.0542863	0.0414556	0.530673	0.318413
cg16060369	10	43698834	RASGEF1A	1.40314e-06	1.24278e-07	-0.0214322	-0.0315273	0.0290417	0.0487534	0.696342	0.524946
cg22374474	1	247681297	GCSAML-AS1	1.40319e-06	4.73141e-09	-0.0286605	-0.0347936	0.0342071	0.043614	0.574258	0.662955
cg18221429	7	150020136	ACTR3C	1.41446e-06	1.76783e-07	-0.042735	-0.0615393	0.0287482	0.0472967	0.776452	0.388721
cg03242028	9	35754421	MSMP	1.41805e-06	1.79841e-07	-0.0190931	-0.0249729	0.0252118	0.0389583	0.431008	0.387168
cg03122674	7	56515752	LOC650226	1.41875e-06	1.01458e-08	0.0449483	0.0574649	0.0340768	0.0442065	0.834461	0.617172
cg23222488	5	176755393	LMAN2	1.43136e-06	<1.0E-50	-0.0316189	-0.0265639	0.0626423	0.0440551	0.632286	0.827696
cg03720617	16	47527034	PHKB	1.43402e-06	1.84007e-09	-0.0311511	-0.0336081	0.0311515	0.0425389	0.413228	0.611185
cg07726139	1	228652528	MIR4666A	1.43788e-06	4.99767e-09	0.0202316	0.0230673	0.0258859	0.0384335	0.218561	0.176411
cg17487170	5	133451259	TCF7	1.43793e-06	1.17682e-07	-0.0129759	-0.0172864	0.0223361	0.0413223	0.28614	0
cg10668414	20	34895979	AAR2	1.44031e-06	4.61853e-13	-0.0253821	-0.0265813	0.0467707	0.0485949	0.713099	0.643008
cg00873811	16	56654264	MT1L	1.44895e-06	4.17444e-14	-0.0521377	-0.0458711	0.0454195	0.0454165	0.334838	0.433031
cg10075360	8	26513239	DPYSL2	1.45024e-06	8.2306e-10	-0.0100706	-0.0107392	0.0308825	0.0367515	0.253478	0.214433
cg05384271	19	6464029	CRB3	1.46082e-06	4.00663e-10	-0.020433	-0.0264424	0.0358405	0.0430276	0.574916	0.396313
cg16328007	1	41119988	RIMS3	1.46846e-06	2.39686e-09	-0.0316201	-0.037345	0.0313041	0.0461588	0.570506	0.551487
cg17736526	7	1329387	UNCX	1.4779e-06	4.08968e-08	-0.0304456	-0.0360763	0.0304175	0.0462503	0.642312	0.764526
cg18059891	19	36499721	SYNE4;ALKBH6	1.48227e-06	3.76144e-10	-0.023235	-0.0271213	0.0357382	0.0445105	0.549052	0.369989
cg11601336	19	19053012	HOMER3	1.49228e-06	7.20579e-12	-0.0157382	-0.0164115	0.0375093	0.0392481	0.199456	0.326877
cg06686742	19	8273505	CERS4	1.50075e-06	2.22045e-16	-0.0521429	-0.0495374	0.0644528	0.0446112	0.649587	0.548832
cg25749306	19	46997775	PNMAL2	1.50254e-06	9.86478e-12	-0.0193353	-0.0236194	0.0395644	0.0450276	0.611473	0.480547
cg11945929	7	158750384	WDR60	1.51708e-06	3.03979e-13	0.0617162	0.0608292	0.053073	0.0485473	0.83577	0.491
cg19340941	4	155702931	RBM46	1.56842e-06	3.94595e-12	-0.0694202	-0.0763191	0.0463786	0.041388	0.740415	0.59815
cg09557543	6	27598947	LOC100507173	1.59185e-06	1.93883e-09	0.0187055	0.023824	0.0276069	0.0357909	0.108551	0
cg21117965	2	220325369	SPEG	1.59956e-06	1.14823e-07	-0.0407548	-0.0544692	0.0292746	0.0494163	0.788063	0.892889
cg17101703	2	69793701	AAK1	1.63433e-06	4.265e-08	-0.0145804	-0.0196553	0.0279754	0.0430699	0.385578	0.251572
cg06154311	20	61002657	RBBP8NL	1.63627e-06	3.34117e-09	-0.0333974	-0.0430622	0.0307258	0.0377962	0.660186	0.674627
cg09972569	2	231712971	ITM2C	1.65192e-06	2.0807e-10	-0.0216361	-0.023537	0.0319207	0.0360054	0.135562	0.460784
cg07143805	20	56286671	PMEPA1	1.66077e-06	4.36835e-10	-0.0137776	-0.016508	0.0360451	0.0457854	0.39433	0.342105
cg04876424	6	17280551	RBM24	1.71083e-06	8.65485e-12	-0.0282663	-0.0302179	0.0421335	0.0412704	0.492131	0.702236
cg20704654	20	30072118	REM1	1.71462e-06	<1.0E-50	-0.0773657	-0.0659307	0.0848938	0.0407726	0.660506	0.534702
cg11004890	20	3218500	SLC4A11	1.71572e-06	8.53317e-13	-0.0289739	-0.0301236	0.0469932	0.0473988	0.698384	0.688119
cg05184311	1	201253537	PKP1	1.72152e-06	2.42029e-14	-0.0313942	-0.0311035	0.05154	0.0438309	0.636078	0.468041
cg20329210	1	228566080	OBSCN	1.73311e-06	7.15659e-08	-0.0421882	-0.0560136	0.0275493	0.0431842	0.570041	0.607179
cg06098368	7	63386616	LOC100506050	1.75245e-06	1.18794e-13	0.0652732	0.0672956	0.0536949	0.0415238	0.797018	0.54672
cg11065575	4	42403471	SHISA3	1.76443e-06	4.54867e-10	-0.0487592	-0.0596794	0.0387404	0.0401754	0.644208	0.563601
cg23082877	19	49243427	RASIP1	1.78119e-06	3.10862e-15	-0.0206813	-0.0188438	0.0516881	0.0447715	0.440082	0.533141
cg23965214	17	37123909	FBXO47	1.85322e-06	5.67857e-12	-0.0424282	-0.0455948	0.0486377	0.0487934	0.743297	0.489605
cg01530605	3	181414848	SOX2-OT	1.8767e-06	2.4029e-09	-0.0460937	-0.0545755	0.0322725	0.0394646	0.478731	0.530761
cg14769703	10	43818695	FXYD4	1.88994e-06	9.7026e-10	-0.0192903	-0.0223795	0.0366772	0.0362553	0.446811	0.494292
cg24116779	7	100841554	MOGAT3	1.91606e-06	6.04629e-09	-0.0252201	-0.0325689	0.0361494	0.040699	0.696501	0.437816
cg01733570	7	24797656	DFNA5	1.92339e-06	1.9984e-14	-0.0366071	-0.0337525	0.0564721	0.046904	0.636359	0.479233
cg22022881	2	105853494	GPR45	1.94601e-06	<1.0E-50	-0.0726391	-0.0520281	0.0680168	0.0422719	0.712215	0.691282
cg06634460	12	123380891	VPS37B	1.95657e-06	1.68214e-08	0.0379072	0.0438393	0.0276284	0.0463033	0.614595	0.484848
cg00488692	2	174877566	SP3	1.96296e-06	6.9259e-10	-0.0323212	-0.036794	0.0347743	0.0408863	0.469355	0.450937
cg10502244	12	48399295	COL2A1	1.96763e-06	2.44249e-15	-0.0423877	-0.0415514	0.0589874	0.0355362	0.733324	0.608741
cg05037688	9	139556554	EGFL7	1.98197e-06	8.72512e-08	-0.0123595	-0.0154376	0.0243299	0.0406542	0.386208	0.43662
cg03296935	3	195946851	SLC51A	1.98673e-06	3.69713e-08	-0.0189884	-0.0225182	0.0262493	0.0385919	0.36287	0.190476
cg19712189	19	33210851	TDRD12	1.99916e-06	5.81509e-09	0.0733151	0.0882428	0.0313884	0.048851	0.719192	0.306143
cg18630748	4	3387499	RGS12	2.00497e-06	<1.0E-50	-0.0248352	-0.0186901	0.0600388	0.0409934	0.3244	0.45035
cg17465423	12	54784180	ZNF385A	2.03337e-06	7.64131e-09	-0.018611	-0.0213078	0.030747	0.041901	0.403996	0.170854
cg18807011	1	184633572	EDEM3	2.0346e-06	1.06655e-08	-0.0258131	-0.0328355	0.0294165	0.0417547	0.473447	0.67334
cg13695585	6	30853014	DDR1	2.03586e-06	1.86207e-12	-0.0255106	-0.0307603	0.0501408	0.0426643	0.640046	0.71875
cg14616345	9	133901267	LAMC3	2.04063e-06	1.6299e-08	0.0119924	0.015287	0.0271892	0.0402965	0.509321	0.455072
cg09604569	2	232161891	ARMC9	2.0702e-06	1.08963e-08	-0.0220252	-0.0272162	0.0218084	0.0384516	0.084386	0.193353
cg19183166	7	150020108	ACTR3C	2.08552e-06	3.86876e-09	-0.0564307	-0.0692357	0.035788	0.0465065	0.769104	0.375125
cg08571821	16	68003649	SLC12A4	2.1062e-06	1.68065e-09	-0.016083	-0.0179258	0.0293152	0.0395561	0.245068	0.175772
cg13481974	15	42174516	SPTBN5	2.11593e-06	9.06386e-12	-0.0293941	-0.026544	0.0407202	0.0449685	0.351924	0.267819
cg13978175	7	2648222	IQCE	2.11627e-06	1.85325e-07	-0.0212166	-0.0292243	0.0240694	0.0422009	0.398113	0.24417
cg01487683	6	5031084	RPP40	2.12881e-06	1.85754e-08	-0.0318363	-0.0389095	0.0284607	0.0354035	0.412505	0.713092
cg21545605	1	36590481	TRAPPC3	2.13268e-06	3.0703e-09	-0.0149547	-0.0204665	0.0329588	0.0459677	0.54392	0.264574
cg25420477	2	70319121	PCBP1	2.13852e-06	1.14629e-07	0.0220894	0.0247411	0.0223846	0.0349972	0.325684	0.21875
cg05726758	16	88448456	ZNF469	2.14375e-06	1.63983e-07	-0.0192688	-0.0252742	0.0238591	0.0437672	0.414175	0.451168
cg05468028	21	30391383	RWDD2B	2.14607e-06	<1.0E-50	-0.0851172	-0.0840809	0.0788663	0.0454982	0.63985	0.503953
cg12356266	8	99984350	OSR2	2.16799e-06	1.55431e-15	-0.0464798	-0.0411092	0.0562195	0.0414598	0.550418	0.515121
cg11437810	15	69744829	RPLP1	2.1762e-06	2.33147e-13	-0.0687184	-0.0679873	0.0486043	0.0459548	0.656062	0.549738
cg19341652	6	116600143	TSPYL1	2.19768e-06	2.22045e-16	0.0429154	0.0386221	0.0613716	0.0393029	0.626772	0.719873
cg21043657	12	33590837	SYT10	2.2002e-06	1.77636e-15	-0.0453995	-0.0435885	0.0559819	0.0426756	0.487939	0.259898
cg08774009	8	49309094	EFCAB1	2.21175e-06	1.44287e-09	-0.0289355	-0.0346116	0.0337318	0.0413628	0.643014	0.828629
cg17285709	2	220300242	SPEG	2.25711e-06	4.27693e-11	-0.0159504	-0.0164068	0.0363539	0.0394061	0.371663	0.433486
cg10582608	6	28664190	SCAND3	2.26651e-06	1.3918e-11	-0.0840152	-0.0882883	0.045854	0.0428835	0.831876	0.605083
cg05901357	2	27529325	TRIM54	2.27064e-06	9.80771e-13	-0.0330058	-0.0329021	0.0451956	0.0432056	0.627975	0.444924
cg03281139	19	3451135	NFIC	2.276e-06	1.71603e-07	-0.0240682	-0.0310042	0.0216005	0.0383039	0.251715	0.341534
cg22109795	1	210468650	HHAT	2.28034e-06	4.35207e-14	-0.0357947	-0.0300583	0.0514426	0.0407068	0.535912	0.558522
cg10903903	6	27647843	LOC100507173	2.28442e-06	1.59562e-07	0.0689551	0.0927416	0.0252486	0.0409076	0.517161	0.221622
cg17501210	6	166970252	RPS6KA2	2.31774e-06	<1.0E-50	-0.0371164	-0.0241608	0.114462	0.0444073	0.601722	0.648822
cg18532215	3	145879568	PLOD2	2.3192e-06	7.04103e-13	-0.0481277	-0.0471875	0.0472268	0.0437272	0.449843	0.568983
cg22273555	6	33130034	COL11A2	2.32201e-06	1.5423e-11	-0.0143124	-0.0152349	0.0400225	0.0435181	0.474637	0.526582
cg22903908	10	64578919	EGR2	2.32295e-06	5.5254e-11	-0.0304185	-0.0327671	0.037087	0.0462245	0.561168	0.418335
cg16760981	11	63688531	RCOR2	2.34681e-06	1.43446e-08	-0.0192126	-0.0248604	0.0315359	0.0405531	0.576799	0.622845
cg19133875	7	128096196	HILPDA	2.3581e-06	1.36019e-07	-0.013139	-0.0157881	0.0189146	0.0361407	0	0
cg02489552	19	15121531	CCDC105	2.39147e-06	3.84212e-08	-0.0285125	-0.0353687	0.031095	0.0476479	0.680985	0.830645
cg10138630	17	74024966	EVPL	2.40322e-06	2.39146e-11	-0.0154143	-0.0152842	0.0350703	0.0434466	0.318458	0.213793
cg05895034	16	2908892	PRSS22	2.41342e-06	6.51479e-13	0.053661	0.055248	0.0510564	0.0426249	0.827494	0.619818
cg08942800	6	49681310	CRISP2	2.4613e-06	4.63629e-13	-0.0590496	-0.0576728	0.051515	0.0431198	0.650454	0.642502
cg01856384	6	41376904	NCR2	2.49746e-06	4.32889e-11	-0.0354316	-0.0365068	0.0415419	0.041413	0.661847	0.833689
cg14067873	12	81110706	MYF5	2.5014e-06	1.82168e-10	-0.0265416	-0.0286434	0.0380065	0.0414365	0.533882	0.272171
cg14453935	18	77398086	CTDP1	2.52627e-06	9.13351e-08	0.0266051	0.0366114	0.0274801	0.0450053	0.720642	0.509548
cg20319926	16	685686	C16orf13	2.55181e-06	1.56428e-08	0.0184266	0.0243919	0.0287165	0.0444972	0.650499	0.775316
cg21486510	2	7171998	RNF144A	2.57403e-06	6.15037e-11	-0.0224016	-0.0225037	0.0343626	0.042061	0.306683	0.273973
cg24030173	19	48922140	GRIN2D	2.58577e-06	1.74954e-08	-0.0138387	-0.0148952	0.027045	0.0366604	0.352697	0.265306
cg02407415	16	857454	PRR25	2.58797e-06	1.15405e-07	0.0749021	0.0950363	0.0306091	0.047407	0.757551	0.506903
cg19084479	7	44163941	POLD2	2.6096e-06	1.31375e-08	-0.0280648	-0.0362308	0.0292792	0.0425071	0.619957	0.608295
cg13942826	12	11002609	PRH1-PRR4	2.61019e-06	2.83273e-08	-0.0357659	-0.0403277	0.0220102	0.0337429	0.0416709	0.283838
cg26715042	6	49681307	CRISP2	2.62318e-06	<1.0E-50	-0.094384	-0.0777948	0.0694529	0.0441784	0.783626	0.682854
cg27011480	6	30228083	HCG17	2.62599e-06	2.42148e-10	-0.0589142	-0.0615843	0.0370544	0.0414838	0.444065	0.542304
cg05079544	16	48644408	N4BP1	2.6524e-06	2.22045e-16	-0.0497159	-0.0437815	0.0632583	0.0420632	0.643108	0.68069
cg00448707	1	68512928	DIRAS3	2.6964e-06	8.73007e-09	-0.0409205	-0.0503974	0.031876	0.0444637	0.691755	0.532129
cg23983884	5	176900806	DBN1	2.69961e-06	1.00382e-09	-0.0313125	-0.0319955	0.026564	0.0337917	0.0443631	0.0151362
cg24474319	1	156671386	CRABP2	2.72784e-06	5.30376e-10	-0.011303	-0.0130838	0.0360125	0.0368877	0.468527	0.472934
cg24063856	17	43863303	CRHR1	2.75911e-06	6.8071e-08	-0.0273668	-0.0333487	0.0268643	0.0399781	0.404327	0.297242
cg06975979	7	150020025	ACTR3C	2.78528e-06	2.51284e-08	-0.0455459	-0.0604151	0.0321719	0.0467948	0.755526	0.430569
cg18973515	15	65713476	IGDCC4	2.81944e-06	1.77149e-09	-0.0196978	-0.0244832	0.0359486	0.0405939	0.587782	0.744211
cg08573701	8	53603035	RB1CC1	2.84234e-06	9.90705e-08	0.031378	0.0382106	0.0208558	0.031522	0.101267	0
cg13223043	1	26492308	FAM110D	2.84525e-06	7.60596e-11	-0.0191903	-0.0167964	0.0339928	0.0369214	0.270399	0.455
cg00245850	8	143925513	GML	2.84552e-06	2.22045e-16	0.032827	0.0316268	0.0452863	0.0280161	0	0.580982
cg13191115	15	90728140	SEMA4B	2.86836e-06	2.30926e-14	-0.0272767	-0.0282209	0.0379341	0.0342739	0.0315186	0
cg03704673	17	4692287	GLTPD2	2.87249e-06	1.95506e-08	-0.0471372	-0.0556191	0.0307568	0.0428826	0.740504	0.631523
cg16390049	6	32165089	NOTCH4	2.88543e-06	1.56415e-08	-0.0309546	-0.0330205	0.0275305	0.0415401	0.593568	0.505143
cg18574254	7	126889015	GRM8	2.89867e-06	5.43476e-12	-0.0635982	-0.0642939	0.0432396	0.0417701	0.525492	0.319459
cg22952142	15	68549178	FEM1B	2.90364e-06	8.88178e-16	-0.0457174	-0.0422841	0.0594554	0.0418991	0.565449	0.575758
cg07502936	19	58571638	ZNF135	2.94543e-06	1.75772e-09	-0.0315561	-0.0358652	0.0365684	0.0404001	0.586575	0.343719
cg00655982	19	50936038	MYBPC2	2.94913e-06	1.06132e-07	-0.0264934	-0.0345735	0.0259453	0.0439361	0.554261	0.508651
cg07263981	2	26726691	OTOF	2.98142e-06	1.49602e-08	-0.0197766	-0.0235393	0.0263781	0.0416884	0.34863	0.313752
cg24195486	14	92788580	SLC24A4	2.99551e-06	2.72915e-11	-0.029917	-0.0331499	0.0419292	0.0451295	0.716708	0.45
cg09556700	1	2230668	SKI	2.99556e-06	<1.0E-50	-0.0324618	-0.0226652	0.0704076	0.0390393	0.415076	0.449495
cg26575633	1	156846336	NTRK1	3.02651e-06	6.43663e-12	-0.0278405	-0.0299288	0.0439469	0.0390559	0.608933	0.659772
cg07444414	6	32117377	PRRT1	3.03183e-06	4.84298e-10	-0.0182273	-0.0208351	0.029956	0.034613	0.147364	0.328976
cg00076325	2	172974630	DLX2	3.04966e-06	9.50528e-08	-0.021565	-0.0254468	0.0251946	0.0426091	0.477754	0.733586
cg11199036	3	129325693	PLXND1	3.12525e-06	1.26565e-14	-0.0226124	-0.0206787	0.0393838	0.0285951	0	0.0492462
cg04674060	17	7792063	CHD3	3.12998e-06	1.7542e-11	0.0194752	0.01839	0.0377695	0.0415364	0.468164	0.0815603
cg09810078	6	30860265	DDR1	3.13015e-06	5.00703e-10	-0.0302798	-0.0352965	0.0371019	0.0426209	0.700039	0.778761
cg16906964	1	4660171	AJAP1	3.15122e-06	6.48814e-13	0.0441381	0.0407583	0.0453235	0.0453449	0.740139	0.845552
cg12167564	1	236047034	LYST	3.16624e-06	3.13395e-08	-0.0183085	-0.0229256	0.0280889	0.0417561	0.477795	0.636943
cg04157161	17	7906847	GUCY2D	3.19918e-06	1.79368e-08	-0.0532282	-0.0674837	0.0298291	0.0392826	0.5224	0.607438
cg27464065	12	12940610	APOLD1	3.20795e-06	2.88325e-12	-0.0240074	-0.0248799	0.0426529	0.0420992	0.39264	0.477376
cg06255037	22	41634447	CHADL	3.20965e-06	7.68874e-12	-0.0195001	-0.0187004	0.0392914	0.0381427	0.339196	0.54982
cg19477346	19	48699872	CARD8	3.22662e-06	2.22045e-16	-0.0607105	-0.0469741	0.0654046	0.0409487	0.789776	0.563136
cg06603923	7	151217961	RHEB	3.2355e-06	2.95675e-12	-0.0266719	-0.0265368	0.0422862	0.041995	0.512805	0.51506
cg01259126	22	29705157	GAS2L1	3.2687e-06	1.40887e-12	-0.0139627	-0.0136735	0.0411302	0.0345691	0.234	0.186683
cg04485850	20	60372565	CDH4	3.27988e-06	3.69394e-08	0.0221468	0.0284995	0.027002	0.040795	0.750289	0.693264
cg12452300	3	51751788	GRM2	3.282e-06	4.91307e-11	-0.0125165	-0.0106831	0.0323043	0.0336731	0.175019	0.188535
cg02335533	12	28124870	PTHLH	3.28899e-06	4.61853e-14	-0.0530059	-0.0508388	0.0551951	0.0433438	0.683453	0.30637
cg18075691	19	58566643	ZSCAN1	3.30732e-06	3.56635e-10	0.0586651	0.0621845	0.0380612	0.0402432	0.807907	0.418838
cg23149300	10	36958940	ANKRD30A	3.31416e-06	3.66428e-10	0.023294	0.0260767	0.0297873	0.037115	0.305921	0.549721
cg17318193	17	77787312	CBX8	3.33383e-06	1.31018e-10	-0.0165328	-0.0175878	0.0309031	0.0298035	0	0
cg10079374	7	158750417	WDR60	3.34723e-06	4.17888e-13	0.0643699	0.0612134	0.0523588	0.0446448	0.82398	0.473896
cg11177833	17	4692377	GLTPD2	3.35995e-06	3.96692e-09	-0.0200274	-0.0246375	0.0328055	0.0422342	0.639012	0.6614
cg20265528	2	105853269	GPR45	3.39703e-06	6.88338e-15	-0.0709243	-0.054199	0.0555159	0.0410739	0.705976	0.624121
cg17590162	11	63827361	MACROD1	3.40156e-06	9.33733e-09	-0.022967	-0.0297085	0.0298577	0.041213	0.669516	0.690096
cg15451853	4	1515692	CRIPAK	3.40187e-06	1.17684e-14	0.0441856	0.0403043	0.0556601	0.0385538	0.635928	0.681081
cg17459387	17	79134666	AATK	3.40496e-06	3.14702e-09	-0.0216246	-0.0254234	0.034122	0.0437085	0.53769	0.706853
cg06711380	17	37123949	FBXO47	3.42053e-06	3.54516e-12	-0.0325792	-0.0343586	0.0487319	0.0462268	0.709728	0.63082
cg15302376	2	25560263	DNMT3A	3.43626e-06	5.09562e-10	0.0204425	0.0202797	0.0352511	0.0390406	0.475896	0.290476
cg01294327	19	2291373	LINGO3	3.46653e-06	2.94824e-11	0.0417804	0.0421637	0.0381546	0.0417949	0.768532	0.751029
cg26152923	19	18284120	IFI30	3.46878e-06	<1.0E-50	-0.030179	-0.0215175	0.0702474	0.0404519	0.405114	0.300836
cg17820878	1	27440463	SLC9A1	3.47955e-06	2.17477e-10	0.034731	0.033781	0.0362669	0.0362944	0.466628	0.495951
cg23363754	7	29606082	PRR15	3.49243e-06	<1.0E-50	0.0718587	0.0557353	0.0608782	0.0412839	0.587861	0.741996
cg05993265	4	2933802	MFSD10	3.4927e-06	9.40074e-10	-0.0196614	-0.0225252	0.0377004	0.043779	0.493291	0.394481
cg15089742	17	25930094	KSR1	3.49469e-06	8.61469e-10	-0.0168234	-0.0162687	0.0304459	0.03735	0.311597	0.106383
cg15753394	6	17282781	RBM24	3.50872e-06	1.2424e-07	-0.0327318	-0.0403467	0.026184	0.0419318	0.427886	0.58897
cg01670771	16	31009232	STX1B	3.51746e-06	8.80472e-08	-0.0148558	-0.0168206	0.0250904	0.038358	0.260441	0.233296
cg07821574	19	18208505	MAST3	3.53258e-06	3.44518e-10	-0.0136761	-0.0137937	0.0247397	0.0326538	0	0.0160966
cg18249244	8	27950725	ELP3	3.5413e-06	1.2998e-10	-0.0202433	-0.0185105	0.0295394	0.0312643	0.00413577	0
cg13301069	11	6624877	RRP8	3.54759e-06	5.07594e-13	-0.019157	-0.0176006	0.0378467	0.0346757	0.0544671	0.0609137
cg00750917	8	139507782	FAM135B	3.57424e-06	<1.0E-50	-0.0277974	-0.0213118	0.0642536	0.0435115	0.431228	0.362734
cg04562562	17	61044133	MIR548W	3.57751e-06	2.47105e-11	-0.0152815	-0.0159237	0.0297371	0.0307252	0.064388	0
cg08178168	22	35934864	RASD2	3.645e-06	9.63863e-08	-0.026426	-0.0364577	0.0301955	0.0410917	0.753662	0.257624
cg05598727	5	8457548	LOC729506	3.65042e-06	7.02327e-13	-0.0606509	-0.055422	0.0490011	0.0410434	0.624038	0.516958
cg26687119	1	156828442	INSRR	3.65565e-06	1.11022e-15	-0.0296387	-0.028171	0.0597401	0.0416732	0.708116	0.508333
cg00594854	17	48052682	DLX4	3.67657e-06	5.35865e-08	-0.0225502	-0.0316296	0.0264637	0.0359753	0.469366	0.436528
cg06368300	17	43065840	C1QL1	3.68096e-06	1.01252e-11	-0.0317445	-0.0359238	0.0451363	0.0399274	0.713741	0.710499
cg26458617	13	32889213	BRCA2	3.68468e-06	1.11274e-09	-0.0294371	-0.027738	0.0285681	0.0317725	0.110616	0.0942721
cg19773937	1	60216631	FGGY	3.68971e-06	1.85497e-07	-0.0350435	-0.0421882	0.0201659	0.0322561	0.0443939	0.0522541
cg24457026	17	42426018	GRN	3.71433e-06	4.44132e-10	-0.0208389	-0.024321	0.034588	0.0420528	0.483279	0.0690789
cg07318204	4	145566441	HHIP-AS1	3.71494e-06	1.77636e-15	-0.0623918	-0.0523281	0.0610019	0.0401654	0.703312	0.871102
cg02905198	12	54070610	ATP5G2	3.74212e-06	1.88061e-07	-0.0241374	-0.0303523	0.0224197	0.0411163	0.434302	0.505525
cg01403948	19	7661617	CAMSAP3	3.74322e-06	1.05937e-08	-0.0385359	-0.0475309	0.0364659	0.0392688	0.720691	0.699694
cg22871908	1	111323421	CD53	3.75974e-06	2.47874e-09	-0.022247	-0.0249677	0.0310598	0.0424479	0.480508	0.533762
cg00934322	6	30854109	DDR1	3.79037e-06	6.46112e-08	-0.0275048	-0.0366862	0.0276972	0.039318	0.702044	0.74238
cg00469015	15	69744684	RPLP1	3.82694e-06	<1.0E-50	-0.0687278	-0.0588458	0.0643139	0.0415933	0.726513	0.555439
cg06073695	6	89843846	PM20D2	3.87774e-06	2.39448e-09	0.0183868	0.0215783	0.0260997	0.0363045	0.226215	0
cg25228625	17	8127373	LINC00324;CTC1	3.88583e-06	2.70856e-10	-0.0134082	-0.0152335	0.0344071	0.0376217	0.330588	0.15917
cg08125755	4	174422908	HAND2	3.88843e-06	1.4122e-13	-0.0247033	-0.0268526	0.0512238	0.0445654	0.683591	0.611051
cg13922451	6	28557542	SCAND3	3.89725e-06	2.2386e-08	0.0298915	0.0388447	0.0248066	0.0404765	0.248061	0.338462
cg14420108	9	34647483	GALT	3.90011e-06	3.36356e-08	0.0213981	0.0262568	0.0245926	0.0320659	0.324115	0.61194
cg11870042	7	2060040	MAD1L1	3.90372e-06	3.53582e-11	-0.0232592	-0.0242651	0.0353751	0.0437138	0.490005	0.702607
cg12614687	5	76926752	OTP	3.99499e-06	<1.0E-50	-0.0336107	-0.0230112	0.062348	0.0375338	0.323671	0.114595
cg13697378	1	68512845	DIRAS3	4.00586e-06	1.43063e-07	-0.022777	-0.0299081	0.0267082	0.0420199	0.630417	0.476048
cg11194698	7	44184840	GCK	4.07152e-06	<1.0E-50	-0.0734478	-0.0552501	0.0818571	0.040387	0.716394	0.831901
cg01412654	3	12328084	PPARG	4.07803e-06	3.34175e-11	-0.0288059	-0.0260602	0.034529	0.0359803	0.176232	0.236307
cg23378165	17	9550256	USP43	4.07871e-06	4.38198e-11	-0.0305483	-0.0329611	0.0406384	0.0424557	0.547067	0.728723
cg03181300	6	26195995	HIST1H3D	4.09539e-06	5.0523e-10	0.105979	0.117148	0.0351711	0.0399799	0.725506	0.634905
cg06623057	17	41390510	LINC00854	4.10038e-06	3.64449e-10	0.0145791	0.0152598	0.0304718	0.0332634	0.160794	0.0661345
cg21894124	12	132904689	GALNT9	4.17556e-06	1.84333e-10	0.0328194	0.0382027	0.0417908	0.0415361	0.796635	0.693916
cg02287371	5	1246274	SLC6A18	4.17573e-06	1.2657e-11	0.0518588	0.0504785	0.0453353	0.0378827	0.738355	0.452452
cg06174495	21	47399648	COL6A1	4.19582e-06	6.24942e-08	-0.022867	-0.0290956	0.0262564	0.0403558	0.531925	0.721225
cg03466562	1	2220317	SKI	4.19728e-06	1.05569e-09	-0.0113825	-0.0109408	0.0298992	0.0303416	0.210588	0.450624
cg07668501	16	86766712	FOXL1	4.20249e-06	5.6801e-09	-0.0587203	-0.0661296	0.0330862	0.0404187	0.740575	0.700405
cg00543443	20	34638744	LINC00657	4.21319e-06	2.22045e-16	0.0182297	0.0147439	0.0456091	0.0305735	0.0590529	0.229908
cg07513768	15	69744528	RPLP1	4.26842e-06	8.37108e-14	-0.0518772	-0.0509408	0.0523719	0.0408137	0.729473	0.507384
cg03454353	9	115819364	ZFP37	4.27465e-06	8.8662e-09	-0.0506469	-0.0594999	0.0339198	0.0437884	0.742243	0.538539
cg05017199	7	150497065	TMEM176B	4.334e-06	4.27609e-09	-0.0275284	-0.0334479	0.0323051	0.0403703	0.472399	0.668565
cg12615761	18	8608907	RAB12	4.35216e-06	2.79798e-12	-0.0324301	-0.0316603	0.042196	0.0327251	0.403367	0.610883
cg09477019	16	56681945	MT1DP	4.37187e-06	1.53922e-09	-0.0252442	-0.0265345	0.0315271	0.0401326	0.60328	0.716544
cg14951955	6	106773949	ATG5	4.42973e-06	6.81313e-09	-0.0369991	-0.0446592	0.0333113	0.0394083	0.717495	0.440678
cg20426959	5	134802501	TIFAB	4.43866e-06	2.22045e-16	-0.0257747	-0.0193719	0.058745	0.0412	0.439354	0.635028
cg16731266	6	28601269	SCAND3	4.44548e-06	2.22045e-15	-0.0715426	-0.0602855	0.059004	0.0395888	0.602164	0.342508
cg08051713	14	57311640	OTX2-AS1	4.477e-06	1.64479e-08	-0.029002	-0.038687	0.0317345	0.0411716	0.754778	0.43956
cg14260073	6	137244681	SLC35D3	4.50766e-06	4.71611e-08	-0.0394483	-0.0521245	0.027759	0.0427068	0.567178	0.262814
cg16620537	5	140306054	PCDHA1	4.56117e-06	7.75598e-08	0.022686	0.0274241	0.0226926	0.0381096	0.279491	0.202051
cg00977403	16	1585720	IFT140	4.61642e-06	1.31695e-12	0.0479964	0.0434235	0.0449049	0.0429608	0.630159	0.692227
cg19822309	19	46181546	GIPR	4.64825e-06	3.4999e-10	-0.028765	-0.0309199	0.035027	0.0428971	0.603265	0.609756
cg19820919	1	9380800	SPSB1	4.6934e-06	1.1506e-10	-0.0211486	-0.0244863	0.0388622	0.0421951	0.575334	0.394704
cg10599571	21	35445161	MRPS6	4.70422e-06	7.79967e-11	-0.0214024	-0.0232789	0.0386623	0.0413477	0.592029	0.712156
cg13461447	1	1714001	NADK	4.7307e-06	1.57057e-09	-0.0318554	-0.0348757	0.0312713	0.0429174	0.435025	0.479208
cg22354234	2	40006543	THUMPD2	4.73115e-06	1.90493e-10	-0.012782	-0.0125773	0.0339312	0.0359944	0.217325	0.218317
cg16596889	1	156891327	LRRC71	4.74939e-06	1.43266e-10	-0.0326265	-0.0352577	0.0395836	0.0392819	0.588439	0.220682
cg03306615	11	2292890	ASCL2	4.77671e-06	2.78858e-09	-0.0398251	-0.0429472	0.0353244	0.0417878	0.779101	0.80733
cg09239106	12	49937997	KCNH3	4.79156e-06	<1.0E-50	-0.0343934	-0.0296693	0.0663084	0.0421835	0.658982	0.670056
cg08350047	16	50278722	PAPD5	4.79776e-06	1.21211e-09	-0.0205362	-0.0239368	0.0375604	0.0390119	0.599069	0.778
cg07041748	16	30023780	DOC2A	4.82866e-06	<1.0E-50	-0.0382697	-0.0296315	0.0722508	0.0410669	0.633385	0.757243
cg06279274	10	124635805	FAM24B-CUZD1	4.87167e-06	<1.0E-50	0.0512919	0.0389074	0.0773612	0.0374581	0.700543	0.412289
cg22160121	3	138153168	ESYT3	4.91438e-06	<1.0E-50	-0.0522669	-0.0397365	0.0744345	0.0417307	0.739068	0.482937
cg00234616	2	74740572	TLX2	4.915e-06	<1.0E-50	-0.0297185	-0.0217284	0.0826386	0.0415646	0.448495	0.305927
cg05568941	17	38517913	GJD3	4.92811e-06	6.44874e-10	-0.0292632	-0.0336619	0.0386272	0.0405104	0.744476	0.729642
cg23652484	1	211872653	NEK2	5.0153e-06	<1.0E-50	-0.032816	-0.0248421	0.0683786	0.0422189	0.563661	0.457647
cg03450829	11	1772468	MOB2	5.03221e-06	1.21852e-09	-0.0126842	-0.015049	0.0335632	0.0412149	0.417751	0.244186
cg20011248	1	227747268	ZNF678	5.04351e-06	2.83642e-08	-0.0268935	-0.0357099	0.0281486	0.0431465	0.738665	0.59735
cg16196077	10	64028521	RTKN2	5.07797e-06	1.58545e-09	-0.0363637	-0.0363303	0.0341209	0.0381115	0.468745	0.823775
cg07208667	8	41425365	AGPAT6	5.12619e-06	1.05451e-08	-0.0227004	-0.0287354	0.0310533	0.0378364	0.526713	0.271018
cg19718508	5	176831858	F12	5.13525e-06	1.69265e-11	-0.0164507	-0.0184893	0.043709	0.0401821	0.650102	0.327434
cg14466942	6	17282700	RBM24	5.14049e-06	1.61093e-12	-0.0258958	-0.0255305	0.0470969	0.0412475	0.502129	0.597207
cg21300318	19	4769206	MIR7-3HG	5.19602e-06	2.4565e-10	0.0394463	0.0434572	0.0406133	0.0403352	0.776735	0.324187
cg12728621	20	34743092	EPB41L1	5.21644e-06	<1.0E-50	-0.0262324	-0.0240008	0.0622033	0.0411577	0.407961	0.512048
cg22344122	11	66839085	RHOD	5.2299e-06	7.12683e-08	-0.0223466	-0.0288362	0.0298501	0.0409148	0.684658	0.698
cg01590439	8	143278608	LINC00051	5.2871e-06	<1.0E-50	-0.032865	-0.0247821	0.0789216	0.0418435	0.643768	0.72551
cg06661765	19	13106629	NFIX	5.31328e-06	9.85294e-11	-0.0143098	-0.0141051	0.0298005	0.0289237	0.0634667	0.072449
cg25400901	6	30860139	DDR1	5.34518e-06	6.42726e-09	-0.0223636	-0.0270735	0.0303169	0.0387847	0.468413	0.430131
cg26929272	10	88295210	WAPAL	5.39021e-06	8.48615e-08	-0.033073	-0.0430704	0.0298882	0.0397991	0.575793	0.650058
cg05644480	19	45418020	APOC1	5.39312e-06	2.53195e-11	-0.0227654	-0.0241629	0.0396146	0.0415939	0.56686	0.591623
cg22912331	14	24042251	JPH4	5.43633e-06	4.8663e-08	-0.0189235	-0.0225347	0.0244188	0.0412257	0.394445	0.228395
cg00945507	7	54827677	SEC61G	5.45442e-06	4.1831e-12	-0.0503824	-0.0493714	0.0472632	0.0438158	0.66951	0.601602
cg11641395	5	110062398	TMEM232	5.47773e-06	2.66454e-15	-0.0555005	-0.0476976	0.0571202	0.0431534	0.683614	0.433538
cg26675395	16	31159623	PRSS36	5.54226e-06	4.78241e-08	-0.0260512	-0.0320475	0.0276652	0.0383902	0.490562	0.657267
cg03852670	4	48484997	SLC10A4	5.60029e-06	1.05471e-12	-0.0498406	-0.0491711	0.0474225	0.0368386	0.592921	0.446123
cg08707819	14	103059391	RCOR1	5.63155e-06	1.06855e-10	-0.0120904	-0.0124723	0.0287865	0.0299326	0.0688026	0.196755
cg21710255	6	49681742	CRISP2	5.68844e-06	1.37668e-14	-0.0504856	-0.0479021	0.0575483	0.0397826	0.588795	0.614053
cg07367302	1	19967428	C1orf151-NBL1	5.7507e-06	4.07766e-10	-0.0116567	-0.0119646	0.0313268	0.0359386	0.386115	0.448849
cg25416125	12	56329615	DGKA	5.76556e-06	1.08253e-10	0.0213275	0.0203305	0.0321653	0.036517	0.3244	0.117486
cg02393699	1	2106620	PRKCZ	5.76662e-06	6.69018e-11	-0.0340018	-0.0367788	0.0423369	0.0371438	0.634906	0.704972
cg00793186	5	139283100	NRG2	5.78197e-06	4.9609e-10	-0.0220179	-0.0251945	0.0385029	0.0428293	0.623119	0.35854
cg21686577	7	75909905	SRRM3	5.78681e-06	1.39444e-12	-0.0250297	-0.0240209	0.0480426	0.0390419	0.501321	0.59548
cg10062919	17	38503802	RARA	5.83502e-06	3.77476e-15	-0.0135778	-0.010947	0.0505159	0.0395126	0.428218	0.487562
cg19905587	2	85554135	TGOLN2	5.94204e-06	1.24345e-14	0.0346357	0.0323926	0.0455782	0.0382291	0.471657	0.502141
cg11203616	7	47576580	TNS3	5.97846e-06	<1.0E-50	0.0397924	0.029896	0.0771234	0.0370961	0.487269	0.644722
cg11117637	5	149546366	CDX1	5.99619e-06	3.1678e-08	-0.0498173	-0.0629537	0.0316	0.0362445	0.750462	0.844985
cg00524708	16	31159558	PRSS36	6.00137e-06	2.56643e-08	-0.0331341	-0.0412322	0.0301277	0.0375705	0.549937	0.630786
cg12673429	18	11150043	PIEZO2	6.00891e-06	7.96629e-12	-0.0332153	-0.0361674	0.0458177	0.0371284	0.633261	0.387031
cg05304729	1	158800024	MNDA	6.01782e-06	1.82176e-08	0.0239069	0.0261018	0.0263067	0.0344466	0.439919	0.444169
cg25144111	6	127796312	SOGA3	6.03648e-06	2.22045e-16	-0.0653764	-0.0466582	0.0618473	0.0368402	0.550147	0.382324
cg11125758	14	83591622	SEL1L(dist=1591416)	6.05346e-06	2.22045e-16	-0.0505509	-0.0396411	0.0645682	0.0404102	0.640431	0.842161
cg19867991	19	13051573	CALR	6.06719e-06	5.74685e-08	-0.0164679	-0.018198	0.0249276	0.0387608	0.341211	0.192429
cg06518251	11	67776030	ALDH3B1	6.12792e-06	1.19405e-07	-0.0138707	-0.0176307	0.0237679	0.0408041	0.392698	0.341102
cg07264586	8	94871988	TMEM67	6.14239e-06	5.04859e-08	-0.0375674	-0.0462378	0.031251	0.0425711	0.645337	0.676647
cg11737831	19	980707	WDR18	6.22748e-06	3.07107e-09	-0.0132682	-0.0138675	0.0305888	0.0346294	0.34377	0.528125
cg01717649	11	66821665	RHOD	6.32698e-06	3.74594e-11	-0.0225328	-0.0232472	0.0414203	0.0399435	0.500132	0.62413
cg07845581	17	56326510	LPO	6.53265e-06	1.29787e-09	-0.0142638	-0.0188865	0.0319959	0.0396454	0.609045	0.366165
cg11848173	12	56121015	CD63	6.56796e-06	7.84481e-11	-0.0278974	-0.0258215	0.036432	0.0387137	0.36354	0.181208
cg05570258	7	105662884	CDHR3	6.56826e-06	4.07065e-09	0.024506	0.0273995	0.0273004	0.0349098	0.322323	0.530263
cg01614764	7	76023325	SRCRB4D	6.61076e-06	5.70331e-08	-0.0211444	-0.0260722	0.0251477	0.039403	0.355075	0.536903
cg09662852	16	11707685	LITAF	6.66644e-06	5.87484e-08	-0.0267603	-0.0298759	0.0259846	0.0370837	0.434039	0.376812
cg08151612	19	49055438	SULT2B1	6.69557e-06	2.98749e-09	-0.0331941	-0.0369088	0.0333391	0.0384895	0.557545	0.278622
cg03533472	16	46919112	GPT2	6.71787e-06	3.56408e-10	-0.0315441	-0.0334566	0.0369445	0.0389297	0.530115	0.316045
cg11853788	1	179561347	TDRD5	6.72892e-06	3.46567e-11	-0.0474739	-0.0478093	0.0415392	0.042493	0.711103	0.513889
cg05695762	4	2059595	NAT8L	6.74056e-06	7.67097e-12	-0.0285877	-0.0265377	0.0445206	0.0404698	0.593061	0.320255
cg14162417	1	226315857	ACBD3	6.75868e-06	1.79762e-10	-0.0171616	-0.0171819	0.0347911	0.0358269	0.457208	0.544174
cg03357547	19	51165207	SHANK1	6.8152e-06	8.7835e-10	-0.0289192	-0.0267848	0.0330229	0.0375135	0.496526	0.618999
cg04487205	17	36997563	C17orf98	6.83286e-06	3.33067e-15	-0.0475089	-0.0436763	0.0571395	0.0350308	0.641695	0.759754
cg26685752	1	152086692	TCHH	6.86168e-06	2.56239e-13	-0.0669469	-0.0601336	0.0471632	0.0339124	0.3673	0.159757
cg01293485	3	42847044	HIGD1A	6.86816e-06	2.84084e-12	-0.0317574	-0.0302694	0.0451815	0.0367498	0.577117	0.499435
cg19243826	19	14584926	PTGER1	6.87983e-06	2.37289e-10	-0.0189489	-0.0197918	0.0351739	0.0378371	0.487119	0.589569
cg05468064	22	46423449	LOC100271722	6.96596e-06	1.10656e-11	-0.0342635	-0.0358897	0.0398932	0.0383891	0.456648	0.778455
cg07370221	12	132904796	GALNT9	7.03858e-06	3.56044e-11	0.0316459	0.0346748	0.0426733	0.0426206	0.769187	0.667627
cg20369299	2	213698158	MIR4776-2	7.05418e-06	<1.0E-50	-0.0477057	-0.0347357	0.068222	0.0372674	0.462864	0.465657
cg06221946	1	32802312	MARCKSL1	7.10733e-06	7.66102e-09	-0.0156586	-0.0190612	0.0308642	0.0451345	0.614602	0.425287
cg17277199	2	24397845	FAM228A	7.15829e-06	<1.0E-50	-0.055955	-0.0488426	0.073655	0.0407751	0.703656	0.427394
cg01990997	3	42977777	KRBOX1	7.1937e-06	1.15707e-12	-0.0393981	-0.0386547	0.0497052	0.0430223	0.739792	0.446123
cg02227331	2	234663937	LOC100286922	7.21004e-06	3.8489e-08	-0.0318115	-0.0362121	0.0292672	0.0374848	0.590734	0.41407
cg07856667	10	94455710	HHEX	7.23483e-06	3.77476e-15	0.0967404	0.0750433	0.0572793	0.0350957	0.594907	0.634274
cg08181251	10	99443455	AVPI1	7.26585e-06	1.91848e-08	-0.020855	-0.0216097	0.0279457	0.0366278	0.368931	0.155738
cg23268208	22	30476345	HORMAD2	7.27548e-06	2.51082e-08	-0.0190009	-0.0235771	0.0272407	0.0386431	0.421365	0.488079
cg06468108	2	173539091	RAPGEF4-AS1	7.30645e-06	1.38803e-09	-0.0423999	-0.0462337	0.0381418	0.0388976	0.713625	0.635135
cg01996116	3	42846907	HIGD1A	7.31611e-06	6.255e-13	-0.053411	-0.052799	0.0482526	0.0380407	0.688176	0.596703
cg12763811	1	220267521	IARS2	7.32258e-06	6.70648e-09	-0.0111674	-0.0117645	0.0226232	0.0271397	0.00332779	0.13401
cg07056606	19	52035287	SIGLEC6	7.36973e-06	3.48607e-09	-0.0148553	-0.0152257	0.0292704	0.0386531	0.350653	0.166963
cg20518446	11	62315034	AHNAK	7.40598e-06	4.88498e-15	-0.0410326	-0.0326545	0.0496237	0.0392587	0.381644	0.681564
cg19741359	2	73429176	NOTO	7.41361e-06	1.19904e-14	-0.0614224	-0.0574818	0.0553712	0.0442426	0.667235	0.22211
cg15799267	17	7942406	ALOX15B	7.46274e-06	4.32987e-12	-0.0257037	-0.0244617	0.0442732	0.0382041	0.656725	0.566871
cg05992786	12	54446308	HOXC4	7.51786e-06	2.22045e-15	-0.0450402	-0.0377991	0.0579861	0.0456425	0.683942	0.64232
cg17072494	6	149401166	UST	7.54396e-06	2.06501e-14	-0.0344599	-0.0284836	0.0450273	0.0399898	0.224382	0.216216
cg15233611	12	122244660	SETD1B	7.61232e-06	2.43361e-13	0.0257312	0.0232912	0.045864	0.0388446	0.621331	0.582955
cg07252200	10	125751941	CHST15	7.69112e-06	1.92454e-07	0.0418757	0.0555315	0.028534	0.0368579	0.758909	0.50303
cg08443038	16	89006877	CBFA2T3	7.73633e-06	3.42171e-13	0.0194084	0.0201891	0.0432019	0.0366307	0.415178	0.491192
cg17112426	19	36004716	DMKN	7.78621e-06	1.00405e-08	-0.0151095	-0.0173527	0.0278217	0.0360153	0.26874	0.374257
cg23610841	8	30891077	PURG	7.89583e-06	1.05803e-09	-0.00950826	-0.0101577	0.0248027	0.0281788	0.0186616	0.0142276
cg17586988	18	5892245	TMEM200C	7.90318e-06	1.68836e-11	-0.0465856	-0.0431287	0.0460514	0.041802	0.722023	0.475767
cg23320056	1	155948742	ARHGEF2	7.93513e-06	3.49174e-09	0.0101075	0.0110476	0.0242579	0.030294	0	0
cg25527770	19	1444892	RPS15	7.96904e-06	1.09742e-07	-0.0208276	-0.0276896	0.0253657	0.0414999	0.564876	0.56964
cg27461196	19	35630106	FXYD1	7.99742e-06	1.33706e-07	-0.0123789	-0.014878	0.0239947	0.0381364	0.409709	0.161172
cg07936030	17	36756043	SRCIN1	8.0014e-06	1.04089e-09	-0.0172544	-0.0197557	0.0332326	0.0400744	0.529996	0.615957
cg01797381	3	57128136	IL17RD	8.06405e-06	3.10179e-08	-0.0221188	-0.0225764	0.0280988	0.0363541	0.356316	0.421053
cg21268578	22	38029478	GGA1	8.12898e-06	1.47532e-07	-0.0296412	-0.0342221	0.026745	0.0392663	0.564624	0.266979
cg06636541	17	79374515	MIR4740	8.18505e-06	4.76774e-12	0.0404631	0.0401283	0.0457999	0.0424758	0.717559	0.729145
cg10632094	3	23244068	UBE2E2	8.20754e-06	2.45097e-09	-0.0240092	-0.026178	0.0330517	0.0377215	0.490313	0.570149
cg25800753	10	94891725	CYP26A1	8.23043e-06	4.44089e-16	-0.0207631	-0.0159419	0.0512796	0.0355483	0.276534	0.332842
cg09900893	1	26865376	RPS6KA1	8.25963e-06	4.71692e-08	-0.013275	-0.0168444	0.027691	0.0331157	0.457081	0.533333
cg24129222	2	74643251	C2orf81	8.29563e-06	3.45945e-13	-0.0409088	-0.0365792	0.0512218	0.0366571	0.704163	0.436419
cg08170427	8	144410815	TOP1MT	8.30026e-06	4.58568e-10	-0.0247207	-0.0254658	0.0327694	0.0373939	0.300116	0.437209
cg14947218	17	41278197	NBR2	8.31422e-06	4.63682e-08	-0.0406884	-0.048036	0.0305364	0.0418064	0.736255	0.463243
cg20341758	10	90966221	CH25H	8.32502e-06	1.05587e-10	-0.0338673	-0.0361789	0.0374713	0.0394843	0.565474	0.52838
cg19598293	7	117854765	ANKRD7	8.34799e-06	6.44251e-09	-0.0369343	-0.0485594	0.0333203	0.0438309	0.592889	0.255081
cg14789818	1	227748712	ZNF678	8.36655e-06	1.47729e-07	-0.039665	-0.0475594	0.0254706	0.039171	0.522893	0.534483
cg22488891	13	40762452	LINC00332	8.36762e-06	<1.0E-50	0.0413228	0.029025	0.0607168	0.0367994	0.404041	0.259259
cg20141652	19	19221574	SLC25A42	8.393e-06	4.11557e-08	-0.0160487	-0.0213356	0.0292672	0.0383569	0.589348	0.552174
cg15053190	22	18893313	DGCR6	8.48325e-06	4.76617e-10	-0.0168907	-0.0169733	0.0316201	0.0365201	0.378576	0.607046
cg17771569	19	1789618	ATP8B3	8.52815e-06	6.63691e-13	0.0366344	0.0345094	0.0503494	0.0388123	0.745145	0.668012
cg25168925	11	1591548	DUSP8	8.53786e-06	8.00972e-08	-0.0126939	-0.0156723	0.0282481	0.0369594	0.573452	0.598039
cg25975485	12	54446537	HOXC4	8.54304e-06	6.56963e-12	-0.0340959	-0.0357515	0.0433208	0.0437488	0.691811	0.649688
cg18056303	17	19770234	ULK2	8.55167e-06	5.80589e-09	-0.0283328	-0.0280917	0.0228487	0.0333976	0.0916722	0.274823
cg26697583	15	89992598	RHCG	8.67067e-06	1.0747e-13	0.0391905	0.0394719	0.0536891	0.0364143	0.812598	0.530815
cg19279310	11	47413087	SPI1	8.67305e-06	7.17516e-08	-0.0108648	-0.0132572	0.0247692	0.0367401	0.266815	0.181081
cg13185046	6	32165321	NOTCH4	8.67332e-06	2.45284e-10	-0.0197247	-0.0193016	0.0344301	0.0412359	0.383683	0.171429
cg08110610	2	234216147	SAG	8.70424e-06	1.77722e-10	0.0155689	0.0150923	0.0294965	0.0275684	0.0451346	0.0927835
cg19605788	19	40729386	CNTD2	8.75469e-06	3.02107e-09	0.0524509	0.0601114	0.0326925	0.039129	0.746541	0.57734
cg02941741	2	233793921	NGEF	8.93382e-06	1.81704e-08	-0.0239953	-0.0328849	0.0312398	0.0367113	0.604959	0.574289
cg01301660	5	110886711	STARD4-AS1	8.97904e-06	4.09257e-10	-0.0187585	-0.0199254	0.0288851	0.032914	0.128549	0.404187
cg16686654	13	24463656	C1QTNF9B-AS1	8.98953e-06	5.59763e-08	-0.0213649	-0.0232689	0.0220079	0.0323956	0.0703863	0.0554435
cg09505788	7	117854511	ANKRD7	9.00007e-06	1.64599e-09	-0.0530474	-0.0618867	0.0355386	0.0433571	0.600891	0.408266
cg02661372	1	181056912	IER5	9.00701e-06	6.9129e-10	-0.021381	-0.0238653	0.0350951	0.0391579	0.354616	0.310722
cg06633543	14	100151561	CYP46A1	9.05485e-06	2.22045e-16	-0.0393255	-0.033453	0.0602629	0.0394723	0.664242	0.727273
cg25513635	19	18981378	GDF1;CERS1	9.07024e-06	8.26006e-14	-0.0313231	-0.0264505	0.0495366	0.0412813	0.476979	0.734491
cg10077239	14	30397686	PRKD1	9.08063e-06	5.46575e-08	-0.0248057	-0.0320241	0.0271237	0.0375964	0.658014	0.607467
cg07021181	11	122853573	BSX	9.09743e-06	5.39568e-14	-0.043074	-0.0435909	0.0543553	0.0380369	0.655167	0.215087
cg12097883	17	62774939	LOC146880	9.20403e-06	6.13827e-08	-0.0403094	-0.0423796	0.0247939	0.0349954	0.235419	0.566906
cg11562153	6	28493500	GPX5	9.26327e-06	9.04006e-10	0.0279648	0.0308272	0.0339959	0.0390023	0.545629	0.58617
cg18391323	13	20716432	GJA3	9.33475e-06	3.77476e-15	-0.0470578	-0.0382756	0.0564201	0.0378537	0.722615	0.602434
cg26689780	4	10079554	WDR1	9.343e-06	5.59552e-14	-0.0207225	-0.0195548	0.0460244	0.036524	0.235748	0.248588
cg10350492	5	33937673	RXFP3	9.37435e-06	7.58682e-12	-0.0356656	-0.0368479	0.046331	0.0394088	0.724408	0.376797
cg05833851	13	100548910	CLYBL	9.39899e-06	1.59872e-14	-0.0630654	-0.05153	0.0471213	0.0368956	0.402486	0.344969
cg22930275	15	102265145	TARSL2	9.52065e-06	4.88119e-08	-0.029024	-0.0329673	0.0294626	0.0373856	0.487609	0.509606
cg23038338	1	46996546	MKNK1-AS1	9.5299e-06	1.74101e-09	-0.0210806	-0.0261305	0.0324172	0.0434169	0.541865	0.507119
cg24309739	4	164088478	NAF1	9.56505e-06	7.42682e-09	-0.0496691	-0.059041	0.0308815	0.0404349	0.633061	0.450151
cg17852385	15	75019188	CYP1A1	9.58726e-06	<1.0E-50	-0.0492388	-0.0349771	0.079064	0.0375726	0.636495	0.583417
cg23445461	5	140864733	PCDHGA1	9.59759e-06	7.62963e-11	0.0657735	0.065314	0.0387811	0.0353831	0.593514	0.133127
cg22165279	10	135436174	FRG2B	9.60443e-06	3.82498e-09	-0.0130686	-0.0135576	0.0316446	0.0349407	0.54719	0.687316
cg18435832	15	45671155	GATM-AS1	9.74818e-06	2.45581e-13	-0.0441393	-0.041354	0.0495827	0.0389924	0.712021	0.689796
cg23570245	17	42426011	GRN	9.79416e-06	6.14435e-10	-0.0221365	-0.0235609	0.0353196	0.0367744	0.518366	0.270769
cg13993914	9	140165710	NELFB	9.97999e-06	2.28365e-09	0.013783	0.0159244	0.0300631	0.0336831	0.372528	0.57508
cg19664013	6	28757366	LOC401242	1.00056e-05	2.71916e-12	0.0393633	0.0426684	0.0443182	0.0386173	0.62031	0.262448
cg16535018	17	36829606	C17orf96	1.00078e-05	1.04711e-08	-0.0220668	-0.0269678	0.026117	0.0394899	0.410016	0.456107
cg03223580	12	76742630	BBS10	1.00133e-05	9.12346e-11	-0.0281331	-0.0296741	0.0402716	0.0384234	0.603999	0.732544
cg04731926	19	35758185	LSR	1.0071e-05	9.86022e-08	-0.0452108	-0.0578571	0.0283128	0.0400085	0.641708	0.76729
cg21727223	17	66755770	ABCA8	1.00829e-05	1.36448e-09	-0.0255007	-0.0254646	0.0292468	0.0381047	0.287614	0.452323
cg24678869	1	153919638	DENND4B;CRTC2	1.00858e-05	7.55977e-09	-0.011791	-0.0129004	0.0267814	0.0365637	0.337215	0.289628
cg07026636	14	103691799	LINC00605	1.00878e-05	7.28573e-12	-0.0193443	-0.0207074	0.0445875	0.0396396	0.534481	0.67297
cg21712830	22	24989335	GGT1	1.01811e-05	2.41074e-12	-0.023493	-0.0208169	0.0362208	0.0335745	0.231087	0.294807
cg12899423	11	44328154	ALX4	1.02085e-05	<1.0E-50	-0.0248775	-0.020383	0.0721	0.0375381	0.665577	0.784254
cg24985772	11	58830610	LOC283194	1.02216e-05	2.10942e-13	-0.0431077	-0.0385053	0.0538715	0.0335287	0.759235	0.511294
cg04645150	6	28584172	SCAND3	1.02254e-05	1.59772e-10	-0.0634286	-0.0629885	0.0379951	0.0392576	0.597484	0.564598
cg27202913	16	89258862	CDH15	1.02382e-05	7.09772e-11	0.0693452	0.0687825	0.0429272	0.0405267	0.804315	0.313568
cg20496314	22	39759864	SYNGR1	1.02768e-05	1.25966e-08	-0.0160683	-0.0177573	0.0258735	0.0378252	0.429035	0.54886
cg22789605	12	51419164	SLC11A2	1.03695e-05	1.86787e-07	0.0207214	0.0238857	0.019331	0.0348731	0.207485	0.453901
cg15323828	1	226053673	TMEM63A	1.04732e-05	2.343e-09	0.0144088	0.0146294	0.0297924	0.0341091	0.36226	0.599729
cg22997177	12	54070527	ATP5G2	1.05653e-05	6.69474e-09	-0.0379648	-0.0419165	0.0314941	0.0366433	0.550409	0.782518
cg00456672	15	62358751	C2CD4A	1.05659e-05	4.54392e-11	-0.0325117	-0.0310569	0.0358116	0.0377748	0.440581	0.709578
cg19822229	1	36616030	TRAPPC3	1.06144e-05	2.96333e-09	-0.0112513	-0.0116943	0.03032	0.0366291	0.369109	0.238636
cg04813911	15	65503889	CILP	1.07891e-05	1.08203e-10	-0.0117421	-0.011678	0.0337436	0.0369955	0.307195	0.423841
cg03749207	16	857863	PRR25	1.0935e-05	6.26413e-10	0.0902164	0.0903819	0.0403477	0.0416002	0.703836	0.429423
cg12002745	8	124179875	FAM83A	1.09571e-05	1.39862e-08	-0.0191904	-0.0204538	0.0283472	0.0370293	0.319784	0.200717
cg01012242	7	140043078	SLC37A3	1.09641e-05	9.996e-08	-0.0186375	-0.0219812	0.0223223	0.0367718	0.298035	0.102662
cg00720629	22	19752228	TBX1	1.10037e-05	2.05037e-07	-0.0170202	-0.0217952	0.0237691	0.0299601	0.387585	0.650108
cg24413781	19	8273693	CERS4	1.10106e-05	5.89173e-12	-0.0443071	-0.0437119	0.0463974	0.036757	0.7052	0.71484
cg15645685	19	19730175	PBX4	1.10124e-05	1.28992e-09	-0.0473204	-0.0497794	0.038136	0.0369296	0.730783	0.566913
cg09240693	2	86038538	LOC284950	1.10677e-05	4.8216e-08	-0.023666	-0.0319213	0.0320002	0.0399235	0.700055	0.679307
cg03353995	11	62455369	LRRN4CL	1.10934e-05	4.22141e-10	-0.0224101	-0.0248776	0.0389786	0.0326182	0.546467	0.435432
cg06380356	2	467891	FAM150B	1.11622e-05	2.08363e-08	-0.0245997	-0.0306113	0.0306253	0.0393884	0.577248	0.561458
cg05413305	17	79366851	BAHCC1	1.13202e-05	1.82234e-08	0.0213658	0.0240953	0.0271556	0.0346415	0.449063	0.538462
cg19074393	10	131682452	EBF3	1.13532e-05	2.80646e-08	-0.0193007	-0.0208037	0.0289816	0.0329572	0.37551	0.487884
cg25298161	15	41806135	LTK	1.13634e-05	1.0779e-07	-0.0167303	-0.0206694	0.0236367	0.0362016	0.424794	0.330309
cg18055623	19	54485327	CACNG8	1.13717e-05	3.03214e-09	-0.0303123	-0.034835	0.0344434	0.0341934	0.729478	0.618503
cg02625623	13	23493069	BASP1P1	1.14663e-05	<1.0E-50	0.063202	0.0355983	0.0626616	0.0308907	0.081148	0.154737
cg17035539	1	229544326	ACTA1	1.15177e-05	2.66454e-15	-0.0299517	-0.025724	0.0623325	0.0349771	0.703392	0.63082
cg05209483	17	7482986	CD68	1.15366e-05	1.15927e-08	-0.0299671	-0.0314974	0.0312757	0.0372779	0.488818	0.279904
cg00052772	6	33245804	B3GALT4	1.16494e-05	1.35066e-09	-0.0170888	-0.0178969	0.0331841	0.0359533	0.461785	0.60884
cg05528623	1	2387670	PLCH2	1.16515e-05	8.19509e-08	0.0240673	0.0313446	0.0281518	0.0384636	0.702134	0.572565
cg10791317	16	744622	FBXL16	1.17331e-05	1.36104e-08	-0.035223	-0.039244	0.029382	0.0341996	0.709315	0.215087
cg13661109	9	129433708	LMX1B	1.18033e-05	4.28546e-14	-0.0410249	-0.036605	0.0525949	0.0396377	0.607739	0.54043
cg00563107	4	141173528	SCOC	1.18929e-05	6.95271e-08	-0.0184576	-0.0205328	0.0240389	0.035707	0.295274	0.359375
cg00485194	3	21792684	ZNF385D	1.1894e-05	7.78571e-10	0.0341915	0.0389068	0.0333695	0.0385472	0.52589	0.668094
cg01005506	10	64565768	ADO	1.19075e-05	1.16652e-10	0.0237596	0.0232997	0.0351638	0.0344662	0.54585	0.699367
cg24163210	1	1713944	NADK	1.19655e-05	8.08385e-10	-0.016881	-0.0176833	0.033846	0.0403367	0.495088	0.543186
cg25985959	6	106430134	PRDM1	1.22706e-05	1.79281e-11	-0.0282744	-0.0261687	0.0392876	0.0334969	0.370001	0.539337
cg00609673	20	62703717	RGS19	1.23253e-05	4.84822e-09	-0.0133928	-0.0143126	0.0288719	0.0321919	0.306571	0.354545
cg02049629	6	28662065	SCAND3	1.23531e-05	<1.0E-50	-0.0417962	-0.0355799	0.0694717	0.036482	0.512672	0.319869
cg02052726	11	126180465	DCPS	1.23596e-05	3.31332e-09	-0.0204185	-0.0201133	0.0299624	0.0356784	0.3622	0.262391
cg08080174	16	72992580	ZFHX3	1.23652e-05	2.6426e-09	-0.0163876	-0.0201513	0.0313563	0.0334037	0.274182	0.455371
cg07366503	1	228330085	GUK1	1.2419e-05	1.03078e-11	0.0313023	0.0276654	0.0405252	0.0367465	0.418592	0.164021
cg13550419	17	44898510	WNT3	1.24538e-05	1.10314e-11	-0.0205662	-0.0210807	0.0417624	0.0363558	0.519192	0.601496
cg20762729	21	30451398	MAP3K7CL	1.25249e-05	3.60544e-08	-0.0219883	-0.0242406	0.0242949	0.033196	0.178232	0.328571
cg23190089	11	2920209	SLC22A18AS	1.2588e-05	8.69583e-09	-0.0270201	-0.0285698	0.0317496	0.0359451	0.359406	0.338462
cg05316463	14	95786663	CLMN	1.26241e-05	3.02095e-08	-0.0242893	-0.0271443	0.0286778	0.0364487	0.615619	0.731757
cg16081441	17	74463560	AANAT	1.26833e-05	6.56299e-08	-0.0106755	-0.0120931	0.0234371	0.0336544	0.292157	0.231552
cg26719629	11	2163299	IGF2-AS	1.27296e-05	1.45112e-07	-0.0381594	-0.0467677	0.0267658	0.0349635	0.668616	0.193193
cg00105640	1	3691994	SMIM1	1.27627e-05	6.97955e-09	-0.0125637	-0.0132767	0.0274309	0.0364696	0.401696	0.632168
cg20133923	20	3027467	MRPS26	1.28294e-05	<1.0E-50	0.025449	0.0176572	0.0713885	0.0346786	0.519371	0.660861
cg06752482	17	58499816	C17orf64	1.29022e-05	1.61856e-07	-0.011699	-0.0150046	0.0250504	0.0367103	0.420718	0.324948
cg09230763	1	27683351	MAP3K6	1.29084e-05	1.36692e-07	-0.0263777	-0.0356721	0.0285778	0.0387634	0.708178	0.554737
cg15229747	19	56097663	FIZ1	1.2914e-05	2.93962e-08	0.0279774	0.0270848	0.0293039	0.0310425	0.418928	0.455096
cg20984663	19	14543883	PKN1	1.29264e-05	6.09663e-09	0.0219205	0.024037	0.0249341	0.0280139	0.0515991	0
cg16216407	4	24797140	SOD3	1.29347e-05	1.78528e-11	-0.0317365	-0.0324162	0.0433559	0.037622	0.685743	0.781006
cg15602972	19	47151481	DACT3	1.29545e-05	7.26626e-10	-0.0235124	-0.0222967	0.0321008	0.036528	0.396016	0.181556
